# Supplementary material for: Conditional independence mapping of DIGE data reveals PDIA3 protein species as key nodes associated with muscle aerobic capacity
Source: PubMed Central journal article supplement — J Proteomics. Author manuscript; Available in PMC 2015 Jun 25. (PMC4150023; doi:10.1016/j.jprot.2014.04.015), 2014-04-24
Supplement: NIHMS600477-supplement-01.pdf [file NIHMS600477-supplement-01.pdf]

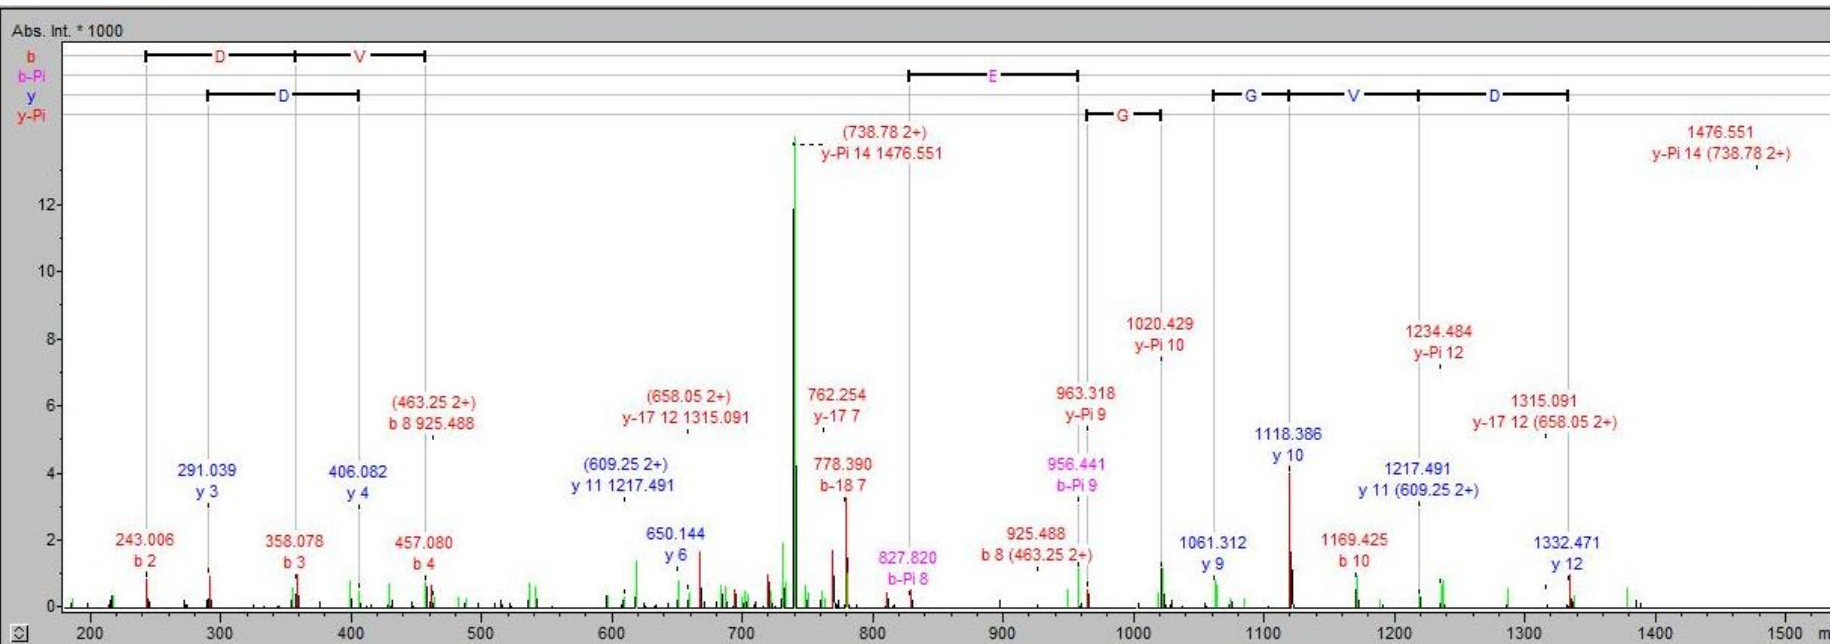

Protein View | Match Errors | MS/MS Fragments | MSMS Analysis

Sequence: **IEDVGSDEEDDSGK** (Peptide Mods: 6: Phospho (ST))

MH+(mono): 1574.574    MH+(avg): 1575.415    MS/MS Tol: 0.500 Da    Peaks: 64    Above Threshold: 64    Zoom to m/z for 2+    Zoom +/-: 5 Da

Masses:  Monoisotopic     Average    Calculate: Masses    Threshold: 0.000    Assigned: 21    Not Assigned: 43    1+, m/z: 0.000

|      | I  | E  | D  | V  | G  | S  | D | E | E | D  | D  | S  | G  | K  | Ile     | Glu     | Asp     | Val     | Gly     | Ser     | Asp     | Glu     | Glu      | Asp      | Asp      | Ser      | Gly      | Lys      |          |
|------|----|----|----|----|----|----|---|---|---|----|----|----|----|----|---------|---------|---------|---------|---------|---------|---------|---------|----------|----------|----------|----------|----------|----------|----------|
| Ion  | 1  | 2  | 3  | 4  | 5  | 6  | 7 | 8 | 9 | 10 | 11 | 12 | 13 | 14 | 1       | 2       | 3       | 4       | 5       | 6       | 7       | 8       | 9        | 10       | 11       | 12       | 13       | 14       |          |
| b    | I  | E  | D  | V  | G  | S* | D | E | E | D  | D  | S  | G  | K  | -       | 114.091 | 243.134 | 358.161 | 457.229 | 514.251 | 681.249 | 796.276 | 925.319  | 1054.361 | 1169.388 | 1284.415 | 1371.447 | 1428.469 | 1556.564 |
| b-17 | I  | E  | D  | V  | G  | S* | D | E | E | D  | D  | S  | G  | K  | -       | -       | -       | -       | -       | -       | -       | -       | -        | -        | -        | -        | -        | -        | 1539.537 |
| b-18 | I  | E  | D  | V  | G  | S* | D | E | E | D  | D  | S  | G  | K  | -       | 225.123 | 340.150 | 439.219 | 496.240 | 663.239 | 778.265 | 907.308 | 1036.351 | 1151.378 | 1266.405 | 1353.437 | 1410.458 | 1538.553 |          |
| b-Pi | I  | E  | D  | V  | G  | S* | D | E | E | D  | D  | S  | G  | K  | -       | -       | -       | -       | -       | 583.272 | 698.299 | 827.342 | 956.384  | 1071.411 | 1186.438 | 1273.470 | 1330.492 | 1458.587 |          |
| y    | I  | E  | D  | V  | G  | S* | D | E | E | D  | D  | S  | G  | K  | 147.113 | 204.134 | 291.166 | 406.193 | 521.220 | 650.263 | 779.305 | 894.332 | 1061.331 | 1118.352 | 1217.421 | 1332.447 | 1461.490 | 1574.574 |          |
| y-17 | I  | E  | D  | V  | G  | S* | D | E | E | D  | D  | S  | G  | K  | 130.086 | 187.108 | 274.140 | 389.167 | 504.194 | 633.236 | 762.279 | 877.306 | 1044.304 | 1101.326 | 1200.394 | 1315.421 | 1444.464 | 1557.548 |          |
| y-18 | I  | E  | D  | V  | G  | S* | D | E | E | D  | D  | S  | G  | K  | -       | -       | 273.156 | 388.183 | 503.210 | 632.252 | 761.295 | 876.322 | 1043.320 | 1100.342 | 1199.410 | 1314.437 | 1443.480 | 1556.564 |          |
| y-Pi | I  | E  | D  | V  | G  | S* | D | E | E | D  | D  | S  | G  | K  | -       | -       | 193.189 | 308.216 | 423.243 | 552.286 | 681.328 | 796.355 | 963.354  | 1020.375 | 1119.444 | 1234.471 | 1363.513 | 1476.597 |          |
|      | 14 | 13 | 12 | 11 | 10 | 9  | 8 | 7 | 6 | 5  | 4  | 3  | 2  | 1  | Lys     | Gly     | Ser     | Asp     | Asp     | Glu     | Glu     | Asp     | Ser      | Gly      | Val      | Asp      | Glu      | Ile      |          |

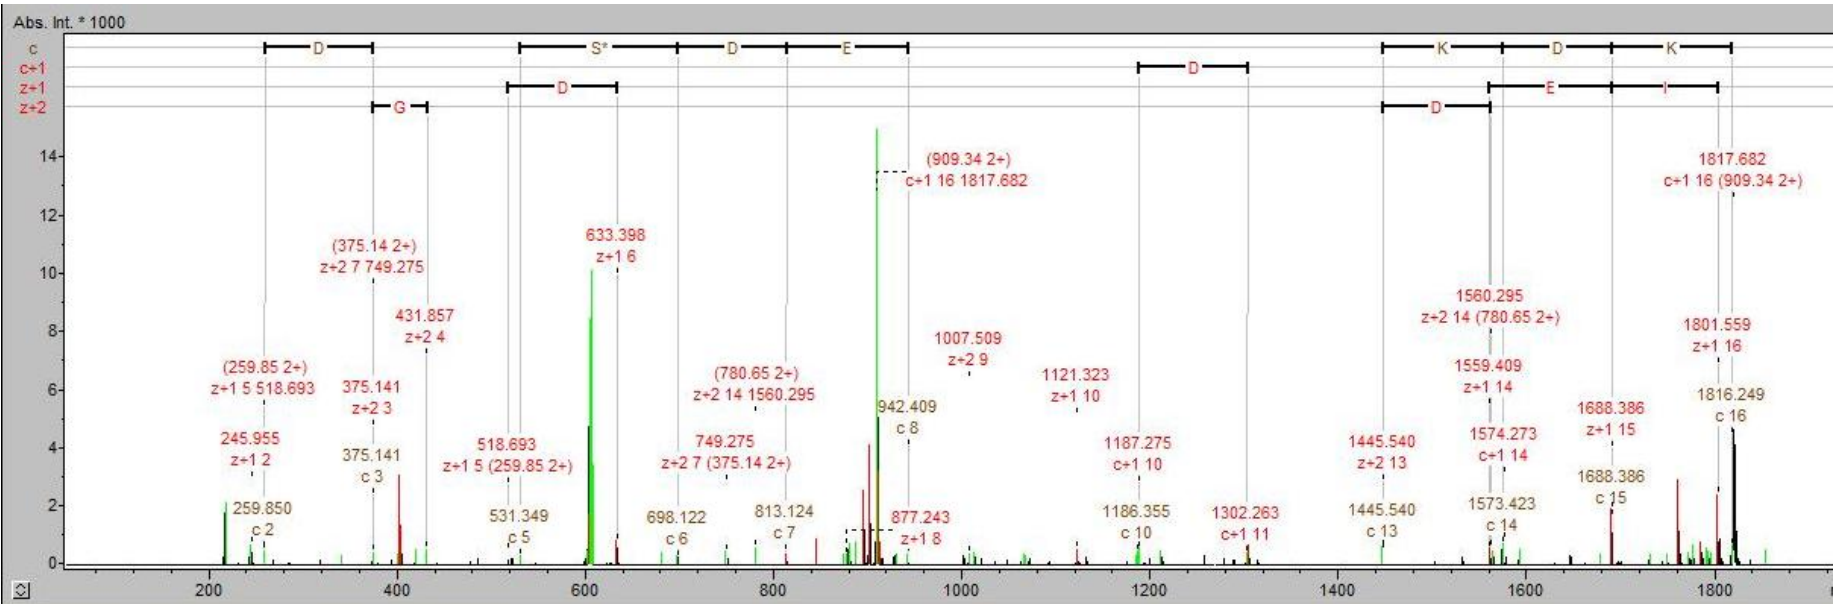

Protein View | Match Errors | MS/MS Fragments | MSMS Analysis

Sequence: IEDVGSDEEDDSGKDK (Peptide Mods: 6: Phospho (ST))

MH+(mono): 1817.696    MH+(avg): 1818.675    MS/MS Tol: 0.500 Da    Peaks: 69    Above Threshold: 69    Zoom to m/z for 2+    Zoom +/-: 5 Da

Masses:  Monoisotopic     Average    Calculate: Masses    Threshold: 0.000    Assigned: 29    Not Assigned: 40    1+, m/z: 0.000

|     | I  | E  | D  | V  | G  | S  | D  | E | E | D  | D  | S  | G  | K  | D  | K  | Ile     | Glu     | Asp     | Val     | Gly     | Ser     | Asp     | Glu     | Glu      | Asp      | Asp      | Ser      | Gly      | Lys |
|-----|----|----|----|----|----|----|----|---|---|----|----|----|----|----|----|----|---------|---------|---------|---------|---------|---------|---------|---------|----------|----------|----------|----------|----------|-----|
| Ion | 1  | 2  | 3  | 4  | 5  | 6  | 7  | 8 | 9 | 10 | 11 | 12 | 13 | 14 | 15 | 16 | 1       | 2       | 3       | 4       | 5       | 6       | 7       | 8       | 9        | 10       | 11       | 12       | 13       | 14  |
| c   | I  | E  | D  | V  | G  | S* | D  | E | E | D  | D  | S  | G  | K  | D  | K  | 131.118 | 260.160 | 375.187 | 474.256 | 531.277 | 698.276 | 813.303 | 942.345 | 1071.388 | 1186.415 | 1301.442 | 1388.474 | 1445.495 | 157 |
| c+1 | I  | E  | D  | V  | G  | S* | D  | E | E | D  | D  | S  | G  | K  | D  | K  | 132.126 | 261.168 | 376.195 | 475.264 | 532.285 | 699.283 | 814.310 | 943.353 | 1072.396 | 1187.423 | 1302.450 | 1389.482 | 1446.503 | 157 |
| z   | I  | E  | D  | V  | G  | S* | D  | E | E | D  | D  | S  | G  | K  | D  | K  | 130.086 | 245.113 | 373.208 | 430.230 | 517.262 | 632.289 | 747.316 | 876.358 | 1005.401 | 1120.428 | 1287.426 | 1344.447 | 1443.516 | 155 |
| z+1 | I  | E  | D  | V  | G  | S* | D  | E | E | D  | D  | S  | G  | K  | D  | K  | 131.094 | 246.121 | 374.216 | 431.237 | 518.269 | 633.296 | 748.323 | 877.366 | 1006.409 | 1121.435 | 1288.434 | 1345.455 | 1444.524 | 155 |
| z+2 | I  | E  | D  | V  | G  | S* | D  | E | E | D  | D  | S  | G  | K  | D  | K  | 132.102 | 247.129 | 375.224 | 432.245 | 519.277 | 634.304 | 749.331 | 878.374 | 1007.416 | 1122.443 | 1289.442 | 1346.463 | 1445.532 | 156 |
|     | 16 | 15 | 14 | 13 | 12 | 11 | 10 | 9 | 8 | 7  | 6  | 5  | 4  | 3  | 2  | 1  | Lys     | Asp     | Lys     | Gly     | Ser     | Asp     | Asp     | Glu     | Glu      | Asp      | Ser      | Gly      | Val      | As  |



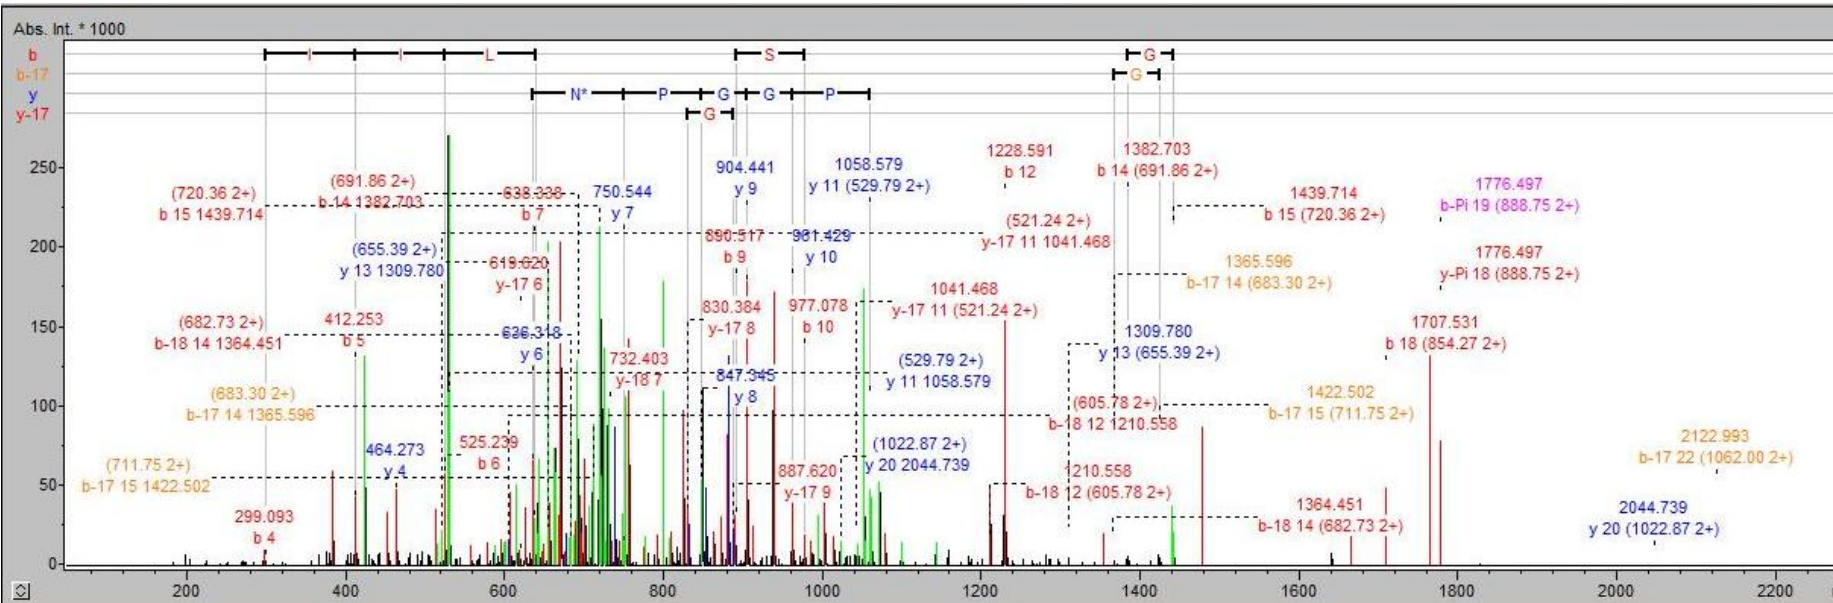

Protein View | Match Errors | MS/MS Fragments | MSMS Analysis

Sequence: A I G G I I L T A S H N P G G P N G D F G I K (Peptide Mods: 17: Deamidated (NQ) 8: Phospho (ST))

MH+(mono): 2286.128 MH+(avg): 2287.449 MS/MS Tol: 0.500 Da Peaks: 108 Above Threshold: 108 Zoom to m/z for 2+ Zoom +/-: 5 Da

Masses:  Monoisotopic  Average Calculate: Masses Threshold: 0.000 Assigned: 31 Not Assigned: 77 1+, m/z: 0.000

|      | A  | I  | G  | G  | I  | I  | L  | T  | A  | S  | H  | N  | P  | G  | G  | P  | N  | G  | D  | F  | G  | I  | K  | Ala     | Ile     | Gly     | Gly     | Ile     | Ile     | Leu     | Thr     | Ala     | Ser     | His      | Asn   |   |       |
|------|----|----|----|----|----|----|----|----|----|----|----|----|----|----|----|----|----|----|----|----|----|----|----|---------|---------|---------|---------|---------|---------|---------|---------|---------|---------|----------|-------|---|-------|
| Ion  | 1  | 2  | 3  | 4  | 5  | 6  | 7  | 8  | 9  | 10 | 11 | 12 | 13 | 14 | 15 | 16 | 17 | 18 | 19 | 20 | 21 | 22 | 23 | 1       | 2       | 3       | 4       | 5       | 6       | 7       | 8       | 9       | 10      | 11       | 12    |   |       |
| b    | A  | I  | G  | G  | I  | I  | L  | T* | A  | S  | H  | N  | P  | G  | G  | P  | N* | G  | D  | F  | G  | I  | K  | 72.044  | 185.128 | 242.150 | 299.171 | 412.255 | 525.340 | 638.424 | 819.438 | 890.475 | 977.507 | 1114.566 | 1228. |   |       |
| b-17 | A  | I  | G  | G  | I  | I  | L  | T* | A  | S  | H  | N  | P  | G  | G  | P  | N* | G  | D  | F  | G  | I  | K  | -       | -       | -       | -       | -       | -       | -       | -       | -       | -       | -        | -     | - | 1211. |
| b-18 | A  | I  | G  | G  | I  | I  | L  | T* | A  | S  | H  | N  | P  | G  | G  | P  | N* | G  | D  | F  | G  | I  | K  | -       | -       | -       | -       | -       | -       | -       | 801.427 | 872.464 | 959.496 | 1096.555 | 1210. |   |       |
| b-Pi | A  | I  | G  | G  | I  | I  | L  | T* | A  | S  | H  | N  | P  | G  | G  | P  | N* | G  | D  | F  | G  | I  | K  | 25.933  | -       | -       | -       | -       | -       | -       | 773.326 | 844.363 | 931.395 | 1068.454 | 1182. |   |       |
| y    | A  | I  | G  | G  | I  | I  | L  | T* | A  | S  | H  | N  | P  | G  | G  | P  | N* | G  | D  | F  | G  | I  | K  | 147.113 | 260.197 | 317.218 | 464.287 | 579.314 | 636.335 | 750.378 | 847.431 | 904.452 | 961.474 | 1058.527 | 1172. |   |       |
| y-17 | A  | I  | G  | G  | I  | I  | L  | T* | A  | S  | H  | N  | P  | G  | G  | P  | N* | G  | D  | F  | G  | I  | K  | 130.086 | 243.170 | 300.192 | 447.260 | 562.287 | 619.309 | 733.352 | 830.404 | 887.426 | 944.447 | 1041.500 | 1155. |   |       |
| y-18 | A  | I  | G  | G  | I  | I  | L  | T* | A  | S  | H  | N  | P  | G  | G  | P  | N* | G  | D  | F  | G  | I  | K  | -       | -       | -       | -       | 561.303 | 618.325 | 732.368 | 829.420 | 886.442 | 943.463 | 1040.516 | 1154. |   |       |
| y-Pi | A  | I  | G  | G  | I  | I  | L  | T* | A  | S  | H  | N  | P  | G  | G  | P  | N* | G  | D  | F  | G  | I  | K  | -       | -       | -       | -       | -       | -       | -       | -       | -       | -       | -        | -     | - |       |
|      | 23 | 22 | 21 | 20 | 19 | 18 | 17 | 16 | 15 | 14 | 13 | 12 | 11 | 10 | 9  | 8  | 7  | 6  | 5  | 4  | 3  | 2  | 1  | Lys     | Ile     | Gly     | Phe     | Asp     | Gly     | Asn     | Pro     | Gly     | Gly     | Pro      | Asn   |   |       |



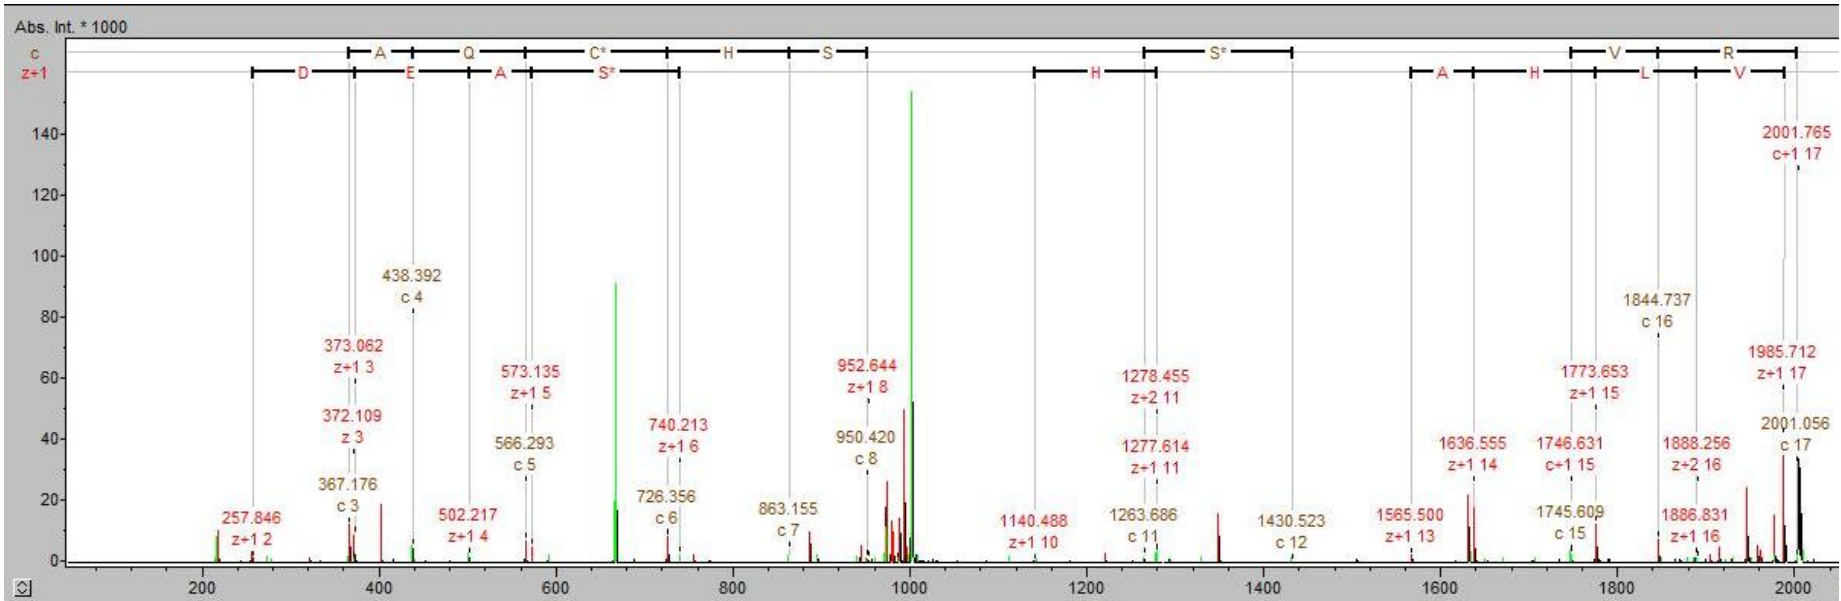

Sequence: VLHAQCHSTPDAEDVR (Peptide Mods: 12: Phospho (ST) 6: Carbamidomethyl (C))

MH+(mono): 2001.848    MH+(avg): 2003.034    MS/MS To: 0.500    Da    Peaks: 85    Above Threshold: 85    Zoom to m/z for 2+    Zoom +/-: 5    Da

Masses:  Monoisotopic     Average    Calculate: Masses    Threshold: 0.000    Assigned: 29    Not Assigned: 56    1+, m/z: 0.000

|     | V  | L  | H  | A  | Q  | C  | H  | S  | T | P  | D  | S  | A  | E  | D  | V  | R  | Val     | Leu     | His     | Ala     | Gln     | Cys     | His     | Ser     | Thr      | Pro      | Asp      | Ser      | Ala      |    |
|-----|----|----|----|----|----|----|----|----|---|----|----|----|----|----|----|----|----|---------|---------|---------|---------|---------|---------|---------|---------|----------|----------|----------|----------|----------|----|
| Ion | 1  | 2  | 3  | 4  | 5  | 6  | 7  | 8  | 9 | 10 | 11 | 12 | 13 | 14 | 15 | 16 | 17 | 1       | 2       | 3       | 4       | 5       | 6       | 7       | 8       | 9        | 10       | 11       | 12       | 13       | 14 |
| c   | V  | L  | H  | A  | Q  | C* | H  | S  | T | P  | D  | S* | A  | E  | D  | V  | R  | 117.102 | 230.186 | 367.245 | 438.282 | 566.341 | 726.372 | 863.430 | 950.462 | 1051.510 | 1148.563 | 1263.590 | 1430.588 | 1501.625 |    |
| c+1 | V  | L  | H  | A  | Q  | C* | H  | S  | T | P  | D  | S* | A  | E  | D  | V  | R  | 118.110 | 231.194 | 368.253 | 439.290 | 567.349 | 727.379 | 864.438 | 951.470 | 1052.518 | 1149.571 | 1264.598 | 1431.596 | 1502.633 |    |
| z   | V  | L  | H  | A  | Q  | C* | H  | S  | T | P  | D  | S* | A  | E  | D  | V  | R  | 158.092 | 257.161 | 372.188 | 501.230 | 572.267 | 739.266 | 854.293 | 951.346 | 1052.393 | 1139.425 | 1276.484 | 1436.515 | 1564.573 |    |
| z+1 | V  | L  | H  | A  | Q  | C* | H  | S  | T | P  | D  | S* | A  | E  | D  | V  | R  | 159.100 | 258.169 | 373.196 | 502.238 | 573.275 | 740.274 | 855.301 | 952.353 | 1053.401 | 1140.433 | 1277.492 | 1437.523 | 1565.581 |    |
| z+2 | V  | L  | H  | A  | Q  | C* | H  | S  | T | P  | D  | S* | A  | E  | D  | V  | R  | 160.108 | 259.176 | 374.203 | 503.246 | 574.283 | 741.281 | 856.308 | 953.361 | 1054.409 | 1141.441 | 1278.500 | 1438.530 | 1566.589 |    |
|     | 17 | 16 | 15 | 14 | 13 | 12 | 11 | 10 | 9 | 8  | 7  | 6  | 5  | 4  | 3  | 2  | 1  | Arg     | Val     | Asp     | Glu     | Ala     | Ser     | Asp     | Pro     | Thr      | Ser      | His      | Cys      | Gln      |    |

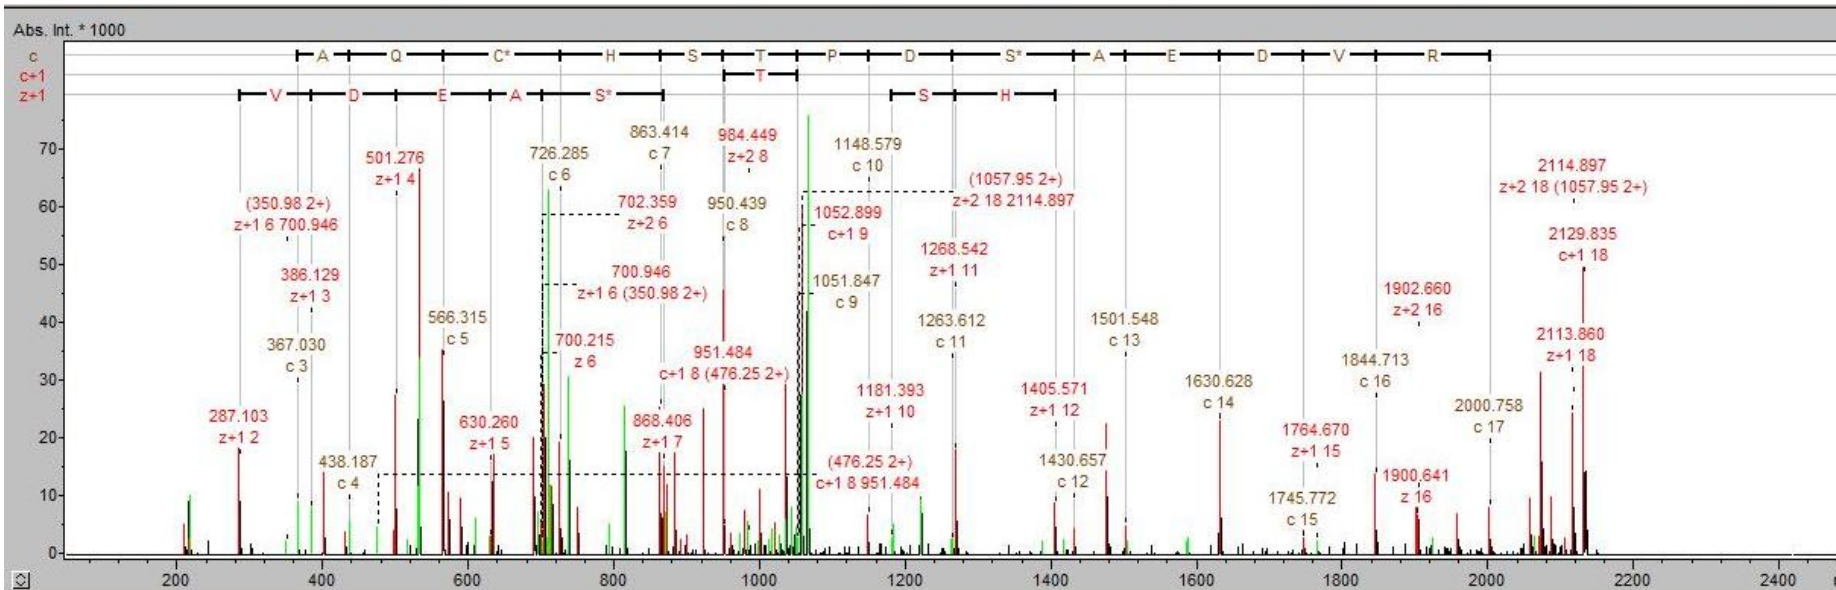

Protein View | Match Errors | MS/MS Fragments | MSMS Analysis

Sequence: VLHAQCHSTPDSEAEDVR (Peptide Mods: 12: Phospho (ST) 6: Carbamidomethyl (C))

MH+(mono): 2129.943 MH+(avg): 2131.206 MS/MS Tol: 0.500 Da Peaks: 108 Above Threshold: 108 Zoom to m/z for 2+ Zoom +/-: 5 Da

Masses:  Monoisotopic  Average Calculate: Masses Threshold: 0.000 Assigned: 35 Not Assigned: 73 1+, m/z: 0.000

|     | V  | L  | H  | A  | Q  | C* | H  | S  | T  | P  | D  | S* | A  | E  | D  | V  | R  | K  | Val     | Leu     | His     | Ala     | Gln     | Cys     | His     | Ser     | Thr      | Pro      | Asp      | Ser      | Ala      |
|-----|----|----|----|----|----|----|----|----|----|----|----|----|----|----|----|----|----|----|---------|---------|---------|---------|---------|---------|---------|---------|----------|----------|----------|----------|----------|
| Ion | 1  | 2  | 3  | 4  | 5  | 6  | 7  | 8  | 9  | 10 | 11 | 12 | 13 | 14 | 15 | 16 | 17 | 18 | 1       | 2       | 3       | 4       | 5       | 6       | 7       | 8       | 9        | 10       | 11       | 12       | 13       |
| c   | V  | L  | H  | A  | Q  | C* | H  | S  | T  | P  | D  | S* | A  | E  | D  | V  | R  | K  | 117.102 | 230.186 | 367.245 | 438.282 | 566.341 | 726.372 | 863.430 | 950.462 | 1051.510 | 1148.563 | 1263.590 | 1430.588 | 1501.625 |
| c+1 | V  | L  | H  | A  | Q  | C* | H  | S  | T  | P  | D  | S* | A  | E  | D  | V  | R  | K  | 118.110 | 231.194 | 368.253 | 439.290 | 567.349 | 727.379 | 864.438 | 951.470 | 1052.518 | 1149.571 | 1264.598 | 1431.596 | 1502.633 |
| z   | V  | L  | H  | A  | Q  | C* | H  | S  | T  | P  | D  | S* | A  | E  | D  | V  | R  | K  | 130.086 | 286.187 | 385.256 | 500.283 | 629.325 | 700.362 | 867.361 | 982.388 | 1079.440 | 1180.488 | 1267.520 | 1404.579 | 1564.610 |
| z+1 | V  | L  | H  | A  | Q  | C* | H  | S  | T  | P  | D  | S* | A  | E  | D  | V  | R  | K  | 131.094 | 287.195 | 386.264 | 501.291 | 630.333 | 701.370 | 868.369 | 983.396 | 1080.448 | 1181.496 | 1268.528 | 1405.587 | 1565.618 |
| z+2 | V  | L  | H  | A  | Q  | C* | H  | S  | T  | P  | D  | S* | A  | E  | D  | V  | R  | K  | 132.102 | 288.203 | 387.271 | 502.298 | 631.341 | 702.378 | 869.376 | 984.403 | 1081.456 | 1182.504 | 1269.536 | 1406.595 | 1566.625 |
|     | 18 | 17 | 16 | 15 | 14 | 13 | 12 | 11 | 10 | 9  | 8  | 7  | 6  | 5  | 4  | 3  | 2  | 1  | Lys     | Arg     | Val     | Asp     | Glu     | Ala     | Ser     | Asp     | Pro      | Thr      | Ser      | His      | Cys      |



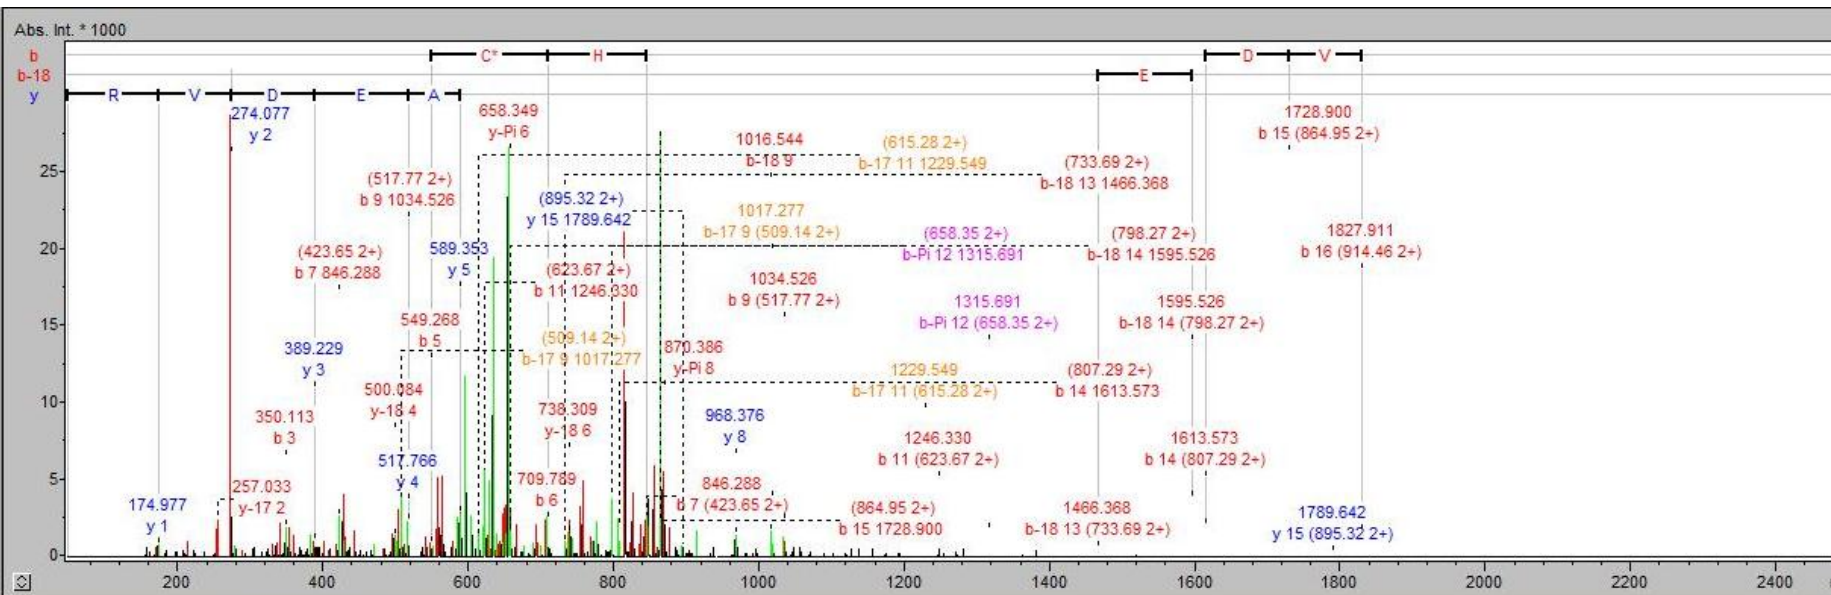

Protein View | Match Errors | MS/MS Fragments | MSMS Analysis

Sequence: VLHAQC<sup>C\*</sup>HSTPD<sup>S</sup>AEDV<sup>R</sup> (Peptide Mods: 12: Phospho (ST) 6: Carbamidomethyl (C))

MH+(mono): 2001.848    MH+(avg): 2003.034    MS/MS Tol: 0.500 Da    Peaks: 109    Above Threshold: 109    Zoom to m/z for 2+    Zoom +/-: 5 Da

Masses:  Monoisotopic     Average    Calculate: Masses    Threshold: 0.000    Assigned: 27    Not Assigned: 82    1+, m/z: 0.000

|      | V  | L  | H  | A  | Q  | C  | H  | S  | T | P  | D  | S  | A  | E  | D  | V  | R  | Val     | Leu     | His     | Ala     | Gln     | Cys     | His     | Ser     | Thr      | Pro      | Asp      | Ser      | Ala      |    |
|------|----|----|----|----|----|----|----|----|---|----|----|----|----|----|----|----|----|---------|---------|---------|---------|---------|---------|---------|---------|----------|----------|----------|----------|----------|----|
| Ion  | 1  | 2  | 3  | 4  | 5  | 6  | 7  | 8  | 9 | 10 | 11 | 12 | 13 | 14 | 15 | 16 | 17 | 1       | 2       | 3       | 4       | 5       | 6       | 7       | 8       | 9        | 10       | 11       | 12       | 13       | 14 |
| b    | V  | L  | H  | A  | Q  | C* | H  | S  | T | P  | D  | S* | A  | E  | D  | V  | R  | 100.076 | 213.160 | 350.219 | 421.256 | 549.314 | 709.345 | 846.404 | 933.436 | 1034.484 | 1131.536 | 1246.563 | 1413.562 | 1484.599 |    |
| b-17 | V  | L  | H  | A  | Q  | C* | H  | S  | T | P  | D  | S* | A  | E  | D  | V  | R  | -       | -       | -       | -       | 532.288 | 692.318 | 829.377 | 916.409 | 1017.457 | 1114.510 | 1229.537 | 1396.535 | 1467.572 |    |
| b-18 | V  | L  | H  | A  | Q  | C* | H  | S  | T | P  | D  | S* | A  | E  | D  | V  | R  | -       | -       | -       | -       | -       | -       | -       | 915.425 | 1016.473 | 1113.526 | 1228.553 | 1395.551 | 1466.588 |    |
| b-Pi | V  | L  | H  | A  | Q  | C* | H  | S  | T | P  | D  | S* | A  | E  | D  | V  | R  | -       | -       | -       | -       | -       | -       | -       | 835.459 | 936.507  | 1033.559 | 1148.586 | 1315.585 | 1386.622 |    |
| y    | V  | L  | H  | A  | Q  | C* | H  | S  | T | P  | D  | S* | A  | E  | D  | V  | R  | 175.119 | 274.187 | 389.214 | 518.257 | 589.294 | 756.292 | 871.319 | 968.372 | 1069.420 | 1156.452 | 1293.511 | 1453.541 | 1581.600 |    |
| y-17 | V  | L  | H  | A  | Q  | C* | H  | S  | T | P  | D  | S* | A  | E  | D  | V  | R  | 158.092 | 257.161 | 372.188 | 501.230 | 572.267 | 739.266 | 854.293 | 951.346 | 1052.393 | 1139.425 | 1276.484 | 1436.515 | 1564.573 |    |
| y-18 | V  | L  | H  | A  | Q  | C* | H  | S  | T | P  | D  | S* | A  | E  | D  | V  | R  | -       | -       | 371.204 | 500.246 | 571.283 | 738.282 | 853.309 | 950.362 | 1051.409 | 1138.441 | 1275.500 | 1435.531 | 1563.589 |    |
| y-Pi | V  | L  | H  | A  | Q  | C* | H  | S  | T | P  | D  | S* | A  | E  | D  | V  | R  | -       | -       | -       | -       | -       | 658.315 | 773.342 | 870.395 | 971.443  | 1058.475 | 1195.534 | 1355.564 | 1483.623 |    |
|      | 17 | 16 | 15 | 14 | 13 | 12 | 11 | 10 | 9 | 8  | 7  | 6  | 5  | 4  | 3  | 2  | 1  | Arg     | Val     | Asp     | Glu     | Ala     | Ser     | Asp     | Pro     | Thr      | Ser      | His      | Cys      | Gln      |    |



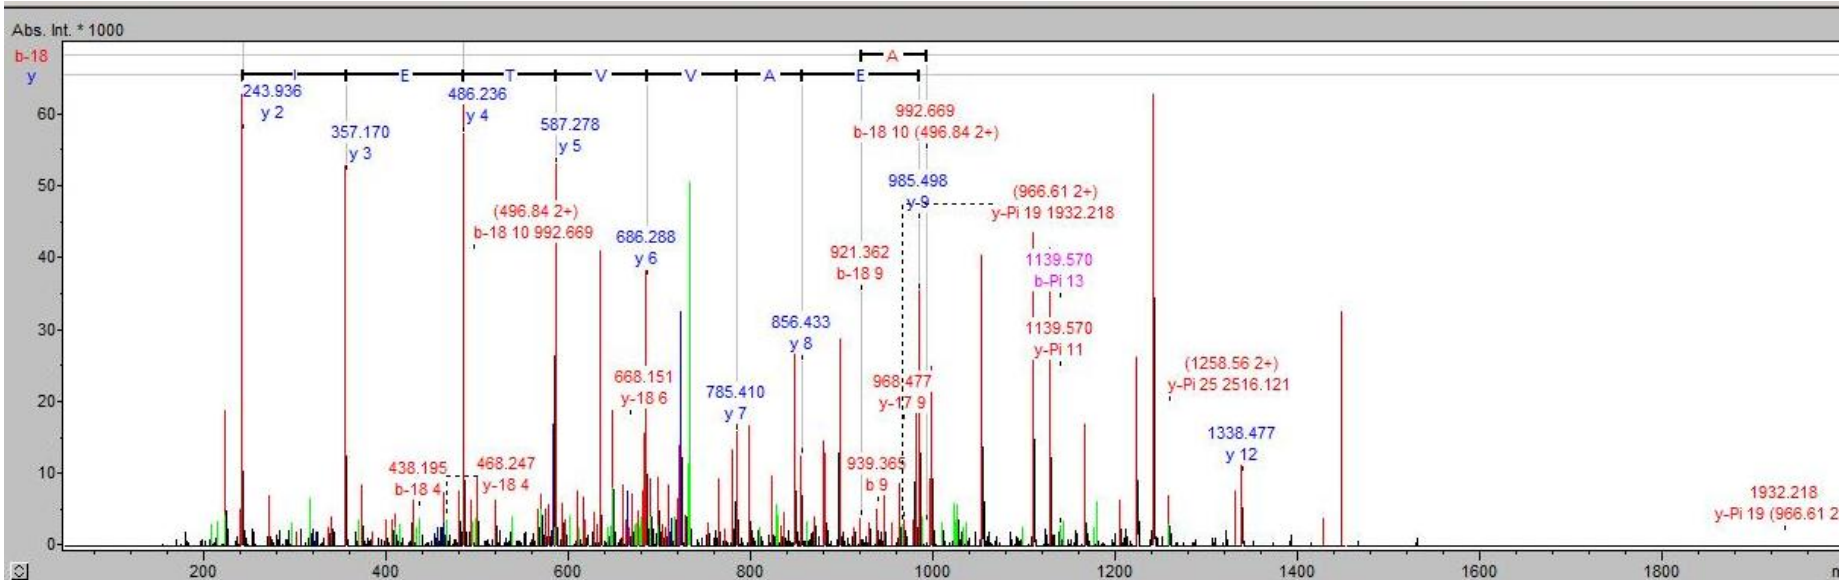

Protein View | Match Errors | MS/MS Fragments | MSMS Analysis

Sequence: VVVRTALLDAAGVALLTAEAVVTEIPK (Peptide Mods: 14: Phospho (ST) 18: Phospho (ST))

MH+(mono): 2968.541    MH+(avg): 2970.232    MS/MS Tol: 0.500 Da    Peaks: 142    Above Threshold: 142    Zoom to m/z for 2+    Zoom +/-: 5 Da  
 Masses:  Monoisotopic     Average    Calculate: Masses    Threshold: 0.000    Assigned: 20    Not Assigned: 122    1+, m/z: 0.000

|      | V  | V  | R  | T  | A  | L  | L  | D  | A  | A  | G  | V  | A  | S  | L  | L  | T  | T  | A  | E  | A  | V  | V  | T  | E  | I  | P  | K  | Val     | Val     | Arg     | Thr     | Ala     | Leu     | Leu     | Asp     | Ala     | Ala      |    |
|------|----|----|----|----|----|----|----|----|----|----|----|----|----|----|----|----|----|----|----|----|----|----|----|----|----|----|----|----|---------|---------|---------|---------|---------|---------|---------|---------|---------|----------|----|
| Ion  | 1  | 2  | 3  | 4  | 5  | 6  | 7  | 8  | 9  | 10 | 11 | 12 | 13 | 14 | 15 | 16 | 17 | 18 | 19 | 20 | 21 | 22 | 23 | 24 | 25 | 26 | 27 | 28 | 1       | 2       | 3       | 4       | 5       | 6       | 7       | 8       | 9       | 10       | 11 |
| b    | V  | V  | R  | T  | A  | L  | L  | D  | A  | A  | G  | V  | A  | S  | L  | L  | T  | T  | A  | E  | A  | V  | V  | T  | E  | I  | P  | K  | 100.076 | 199.144 | 355.245 | 456.293 | 527.330 | 640.414 | 753.498 | 868.525 | 939.562 | 1010.599 | 1  |
| b-17 | V  | V  | R  | T  | A  | L  | L  | D  | A  | A  | G  | V  | A  | S  | L  | L  | T  | T  | A  | E  | A  | V  | V  | T  | E  | I  | P  | K  | -       | -       | 338.219 | 439.266 | 510.303 | 623.388 | 736.472 | 851.499 | 922.536 | 993.573  | 1  |
| b-18 | V  | V  | R  | T  | A  | L  | L  | D  | A  | A  | G  | V  | A  | S  | L  | L  | T  | T  | A  | E  | A  | V  | V  | T  | E  | I  | P  | K  | -       | -       | -       | 438.282 | 509.319 | 622.404 | 735.488 | 850.515 | 921.552 | 992.589  | 1  |
| b-Pi | V  | V  | R  | T  | A  | L  | L  | D  | A  | A  | G  | V  | A  | S  | L  | L  | T  | T  | A  | E  | A  | V  | V  | T  | E  | I  | P  | K  | -       | -       | -       | 358.316 | 429.353 | 542.437 | 655.521 | 770.548 | 841.585 | 912.622  | 1  |
| y    | V  | V  | R  | T  | A  | L  | L  | D  | A  | A  | G  | V  | A  | S  | L  | L  | T  | T  | A  | E  | A  | V  | V  | T  | E  | I  | P  | K  | 147.113 | 244.166 | 357.250 | 486.292 | 587.340 | 686.408 | 785.477 | 856.514 | 985.556 | 1056.594 | 1  |
| y-17 | V  | V  | R  | T  | A  | L  | L  | D  | A  | A  | G  | V  | A  | S  | L  | L  | T  | T  | A  | E  | A  | V  | V  | T  | E  | I  | P  | K  | 130.086 | 227.139 | 340.223 | 469.266 | 570.313 | 669.382 | 768.450 | 839.487 | 968.530 | 1039.567 | 1  |
| y-18 | V  | V  | R  | T  | A  | L  | L  | D  | A  | A  | G  | V  | A  | S  | L  | L  | T  | T  | A  | E  | A  | V  | V  | T  | E  | I  | P  | K  | -       | -       | -       | 468.282 | 569.329 | 668.398 | 767.466 | 838.503 | 967.546 | 1038.583 | 1  |
| y-Pi | V  | V  | R  | T  | A  | L  | L  | D  | A  | A  | G  | V  | A  | S  | L  | L  | T  | T  | A  | E  | A  | V  | V  | T  | E  | I  | P  | K  | -       | -       | -       | -       | 489.363 | 588.431 | 687.500 | 758.537 | 887.580 | 958.617  | 1  |
|      | 28 | 27 | 26 | 25 | 24 | 23 | 22 | 21 | 20 | 19 | 18 | 17 | 16 | 15 | 14 | 13 | 12 | 11 | 10 | 9  | 8  | 7  | 6  | 5  | 4  | 3  | 2  | 1  | Lys     | Pro     | Ile     | Glu     | Thr     | Val     | Val     | Ala     | Glu     | Ala      |    |

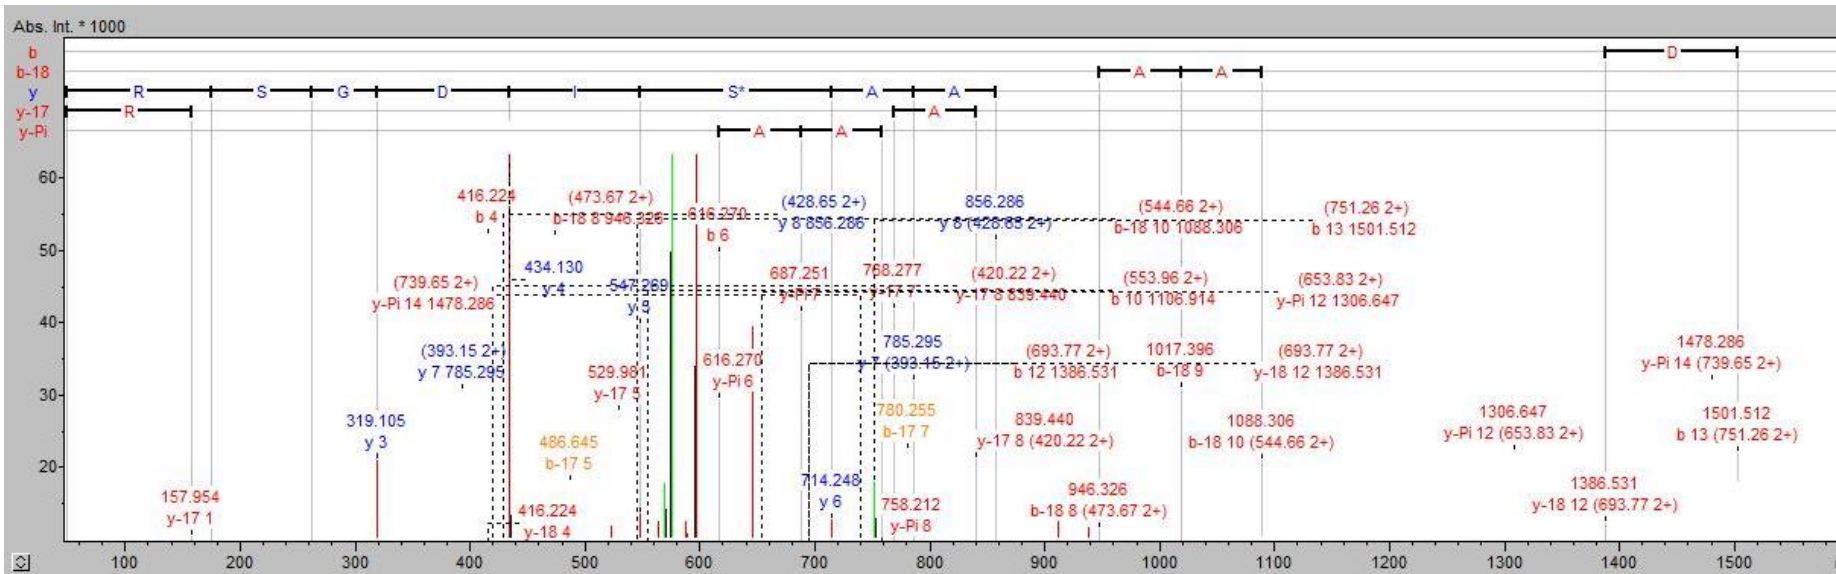

Protein View | Match Errors | MS/MS Fragments | MSMS Analysis

Sequence: SRTASLTSAAIDGSR (Peptide Mods: 7: Phospho (ST) 8: Phospho (ST) 11: Phospho (ST))

MH+(mono): 1819.702 MH+(avg): 1820.619 MS/MS Tol: 0.500 Da Peaks: 137 Above Threshold: 137 Zoom to m/z for 2+ Zoom +/-: 5 Da

Masses:  Monoisotopic  Average Calculate: Masses Threshold: 0.000 Assigned: 30 Not Assigned: 107 1+, m/z: 0.000

|      | S  | R  | T  | A  | S  | L  | T  | S  | A | A  | S  | I  | D  | G  | S  | R  | Ser     | Arg     | Thr     | Ala     | Ser     | Leu     | Thr     | Ser     | Ala      | Ala      | Ser      | Ile      | Asp      | G  |
|------|----|----|----|----|----|----|----|----|---|----|----|----|----|----|----|----|---------|---------|---------|---------|---------|---------|---------|---------|----------|----------|----------|----------|----------|----|
| Ion  | 1  | 2  | 3  | 4  | 5  | 6  | 7  | 8  | 9 | 10 | 11 | 12 | 13 | 14 | 15 | 16 | 1       | 2       | 3       | 4       | 5       | 6       | 7       | 8       | 9        | 10       | 11       | 12       | 13       | 14 |
| b    | S  | R  | T  | A  | S  | L  | T* | S* | A | A  | S* | I  | D  | G  | S  | R  | 88.039  | 244.140 | 345.188 | 416.225 | 503.257 | 616.341 | 797.355 | 964.354 | 1035.391 | 1106.428 | 1273.426 | 1386.510 | 1501.537 | 15 |
| b-17 | S  | R  | T  | A  | S  | L  | T* | S* | A | A  | S* | I  | D  | G  | S  | R  | -       | 227.114 | 328.162 | 399.199 | 486.231 | 599.315 | 780.329 | 947.327 | 1018.364 | 1089.401 | 1256.400 | 1369.484 | 1484.511 | 15 |
| b-18 | S  | R  | T  | A  | S  | L  | T* | S* | A | A  | S* | I  | D  | G  | S  | R  | 70.029  | 226.130 | 327.178 | 398.215 | 485.247 | 598.331 | 779.345 | 946.343 | 1017.380 | 1088.417 | 1255.416 | 1368.500 | 1483.527 | 15 |
| b-Pi | S  | R  | T  | A  | S  | L  | T* | S* | A | A  | S* | I  | D  | G  | S  | R  | -       | 166.039 | 267.086 | 338.123 | 425.156 | 538.240 | 719.254 | 886.252 | 957.289  | 1028.326 | 1195.325 | 1308.409 | 1423.436 | 14 |
| y    | S  | R  | T  | A  | S  | L  | T* | S* | A | A  | S* | I  | D  | G  | S  | R  | 175.119 | 262.151 | 319.172 | 434.199 | 547.283 | 714.282 | 785.319 | 856.356 | 1023.354 | 1204.368 | 1317.452 | 1404.484 | 1475.522 | 15 |
| y-17 | S  | R  | T  | A  | S  | L  | T* | S* | A | A  | S* | I  | D  | G  | S  | R  | 158.092 | 245.124 | 302.146 | 417.173 | 530.257 | 697.255 | 768.292 | 839.329 | 1006.328 | 1187.342 | 1300.426 | 1387.458 | 1458.495 | 15 |
| y-18 | S  | R  | T  | A  | S  | L  | T* | S* | A | A  | S* | I  | D  | G  | S  | R  | -       | 244.140 | 301.162 | 416.189 | 529.273 | 696.271 | 767.308 | 838.345 | 1005.344 | 1186.358 | 1299.442 | 1386.474 | 1457.511 | 15 |
| y-Pi | S  | R  | T  | A  | S  | L  | T* | S* | A | A  | S* | I  | D  | G  | S  | R  | -       | 164.174 | 221.196 | 336.222 | 449.307 | 616.305 | 687.342 | 758.379 | 925.378  | 1106.392 | 1219.476 | 1306.508 | 1377.545 | 14 |
|      | 16 | 15 | 14 | 13 | 12 | 11 | 10 | 9  | 8 | 7  | 6  | 5  | 4  | 3  | 2  | 1  | Arg     | Ser     | Gly     | Asp     | Ile     | Ser     | Ala     | Ala     | Ser      | Thr      | Leu      | Ser      | Ala      | T  |



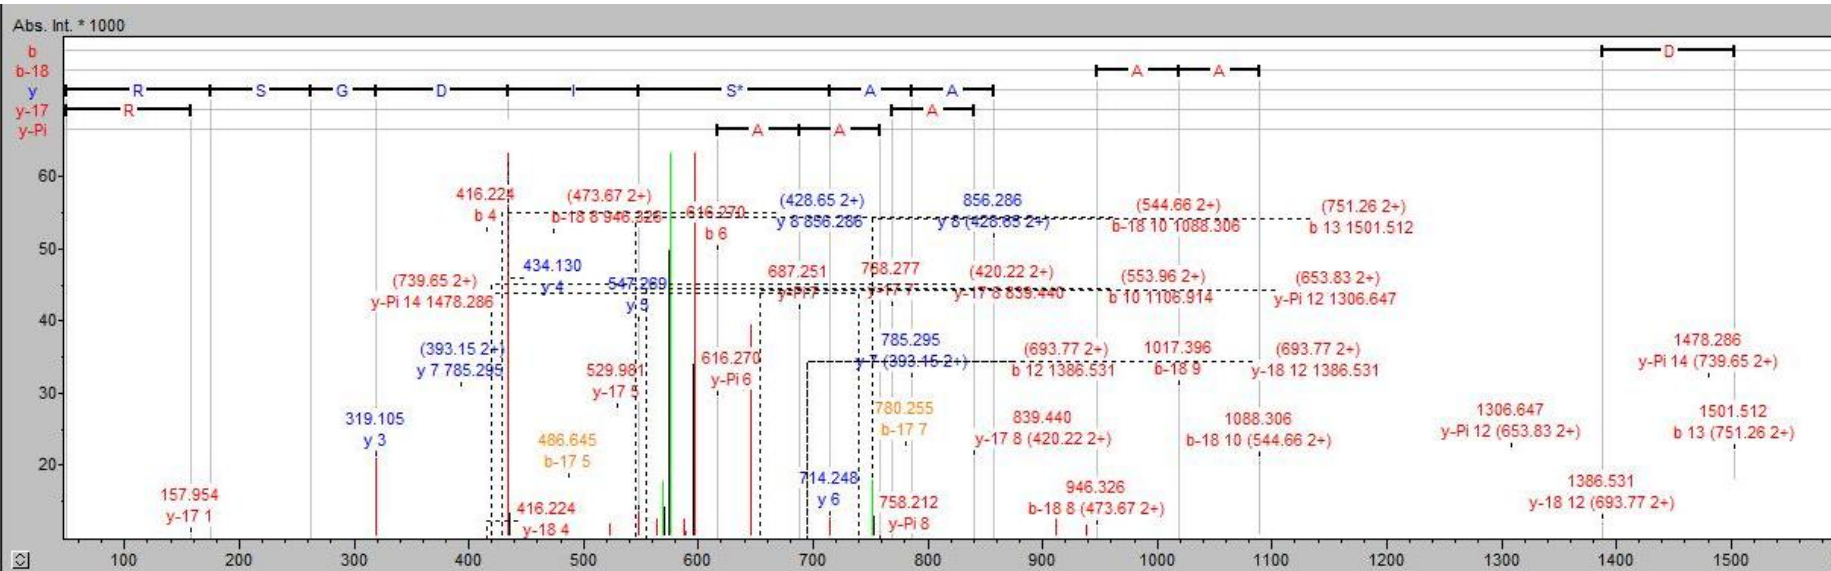

Protein View | Match Errors | MS/MS Fragments | MSMS Analysis

Sequence: SRTASLTSAAIDGSR (Peptide Mods: 7: Phospho (ST) 8: Phospho (ST) 11: Phospho (ST))

MH+(mono): 1819.702 MH+(avg): 1820.619 MS/MS Tol: 0.500 Da Peaks: 137 Above Threshold: 137 Zoom to m/z for 2+ Zoom +/-: 5 Da

Masses:  Monoisotopic  Average Calculate: Masses Threshold: 0.000 Assigned: 30 Not Assigned: 107 1+, m/z: 0.000

|      | S  | R  | T  | A  | S  | L  | T  | S* | A | A  | S  | I  | D  | G  | S  | R  | Ser     | Arg     | Thr     | Ala     | Ser     | Leu     | Thr     | Ser     | Ala      | Ala      | Ser      | Ile      | Asp      | G  |
|------|----|----|----|----|----|----|----|----|---|----|----|----|----|----|----|----|---------|---------|---------|---------|---------|---------|---------|---------|----------|----------|----------|----------|----------|----|
| Ion  | 1  | 2  | 3  | 4  | 5  | 6  | 7  | 8  | 9 | 10 | 11 | 12 | 13 | 14 | 15 | 16 | 1       | 2       | 3       | 4       | 5       | 6       | 7       | 8       | 9        | 10       | 11       | 12       | 13       | 14 |
| b    | S  | R  | T  | A  | S  | L  | T* | S* | A | A  | S* | I  | D  | G  | S  | R  | 88.039  | 244.140 | 345.188 | 416.225 | 503.257 | 616.341 | 797.355 | 964.354 | 1035.391 | 1106.428 | 1273.426 | 1386.510 | 1501.537 | 15 |
| b-17 | S  | R  | T  | A  | S  | L  | T* | S* | A | A  | S* | I  | D  | G  | S  | R  | -       | 227.114 | 328.162 | 399.199 | 486.231 | 599.315 | 780.329 | 947.327 | 1018.364 | 1089.401 | 1256.400 | 1369.484 | 1484.511 | 15 |
| b-18 | S  | R  | T  | A  | S  | L  | T* | S* | A | A  | S* | I  | D  | G  | S  | R  | 70.029  | 226.130 | 327.178 | 398.215 | 485.247 | 598.331 | 779.345 | 946.343 | 1017.380 | 1088.417 | 1255.416 | 1368.500 | 1483.527 | 15 |
| b-Pi | S  | R  | T  | A  | S  | L  | T* | S* | A | A  | S* | I  | D  | G  | S  | R  | -       | 166.039 | 267.086 | 338.123 | 425.156 | 538.240 | 719.254 | 886.252 | 957.289  | 1028.326 | 1195.325 | 1308.409 | 1423.436 | 14 |
| y    | S  | R  | T  | A  | S  | L  | T* | S* | A | A  | S* | I  | D  | G  | S  | R  | 175.119 | 262.151 | 319.172 | 434.199 | 547.283 | 714.282 | 785.319 | 856.356 | 1023.354 | 1204.368 | 1317.452 | 1404.484 | 1475.522 | 15 |
| y-17 | S  | R  | T  | A  | S  | L  | T* | S* | A | A  | S* | I  | D  | G  | S  | R  | 158.092 | 245.124 | 302.146 | 417.173 | 530.257 | 697.255 | 768.292 | 839.329 | 1006.328 | 1187.342 | 1300.426 | 1387.458 | 1458.495 | 15 |
| y-18 | S  | R  | T  | A  | S  | L  | T* | S* | A | A  | S* | I  | D  | G  | S  | R  | -       | 244.140 | 301.162 | 416.189 | 529.273 | 696.271 | 767.308 | 838.345 | 1005.344 | 1186.358 | 1299.442 | 1386.474 | 1457.511 | 15 |
| y-Pi | S  | R  | T  | A  | S  | L  | T* | S* | A | A  | S* | I  | D  | G  | S  | R  | -       | 164.174 | 221.196 | 336.222 | 449.307 | 616.305 | 687.342 | 758.379 | 925.378  | 1106.392 | 1219.476 | 1306.508 | 1377.545 | 14 |
|      | 16 | 15 | 14 | 13 | 12 | 11 | 10 | 9  | 8 | 7  | 6  | 5  | 4  | 3  | 2  | 1  | Arg     | Ser     | Gly     | Asp     | Ile     | Ser     | Ala     | Ala     | Ser      | Thr      | Leu      | Ser      | Ala      | T  |



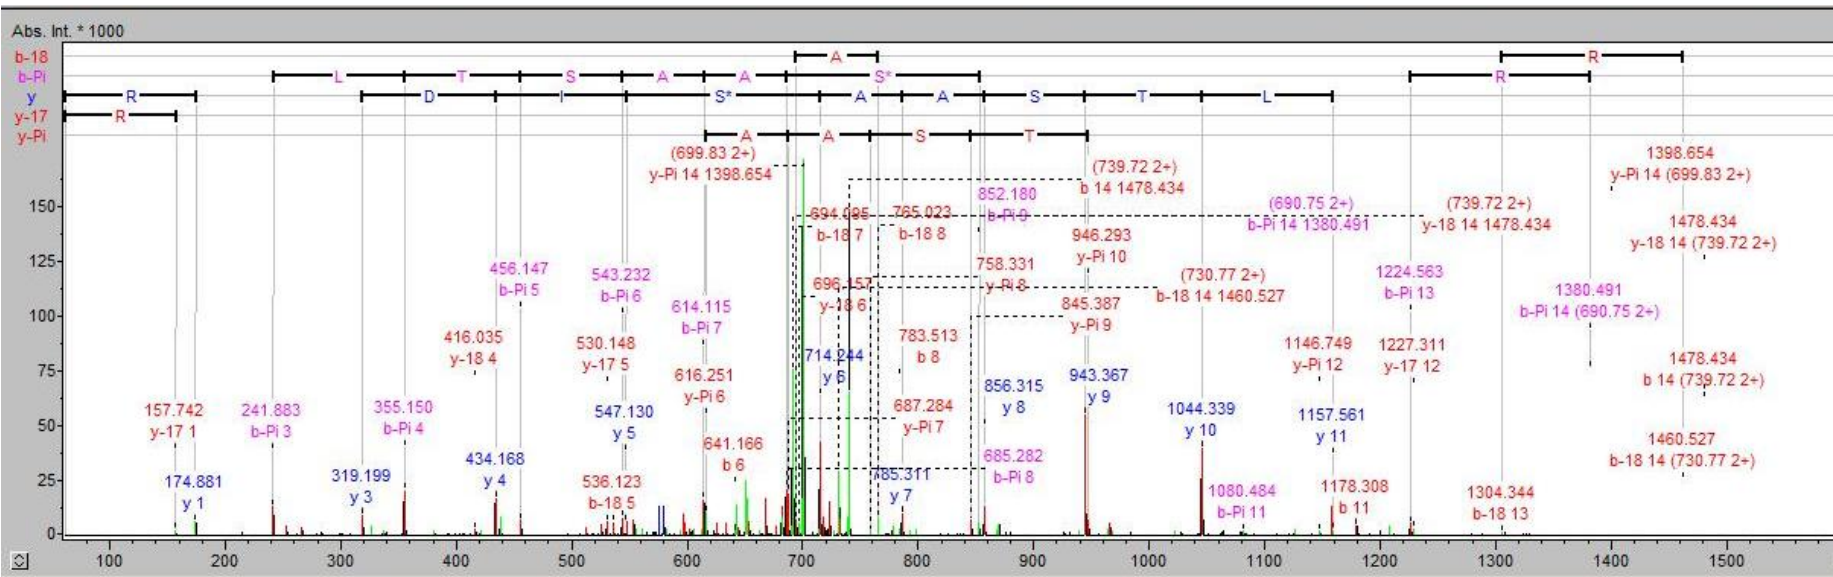

Protein View | Match Errors | MS/MS Fragments | MSMS Analysis

Sequence: **TASLTSAA SIDGSR (Peptide Mods: 1: Phospho (ST) 9: Phospho (ST))**

MH+(mono): 1496.603    MH+(avg): 1497.376    MS/MS Tol: 0.500 Da    Peaks: 93    Above Threshold: 93    Zoom to m/z for 2+    Zoom +/-: 5 Da

Masses:  Monoisotopic     Average    Calculate: Masses    Threshold: 0.000    Assigned: 42    Not Assigned: 51    1+, m/z: 0.000

|      | T  | A  | S  | L  | T  | S | A | A | S  | I  | D  | G  | S  | R  | Thr | Ala     | Ser     | Leu     | Thr     | Ser     | Ala     | Ala     | Ser     | Ile     | Asp      | Gly      | Ser      | Arg      |          |
|------|----|----|----|----|----|---|---|---|----|----|----|----|----|----|-----|---------|---------|---------|---------|---------|---------|---------|---------|---------|----------|----------|----------|----------|----------|
| Ion  | 1  | 2  | 3  | 4  | 5  | 6 | 7 | 8 | 9  | 10 | 11 | 12 | 13 | 14 | 1   | 2       | 3       | 4       | 5       | 6       | 7       | 8       | 9       | 10      | 11       | 12       | 13       | 14       |          |
| b    | T* | A  | S  | L  | T  | S | A | A | S* | I  | D  | G  | S  | R  |     | 182.021 | 253.058 | 340.090 | 453.174 | 554.222 | 641.254 | 712.291 | 783.328 | 950.327 | 1063.411 | 1178.438 | 1235.459 | 1322.491 | 1478.592 |
| b-17 | T* | A  | S  | L  | T  | S | A | A | S* | I  | D  | G  | S  | R  |     |         |         |         |         |         |         |         |         |         |          |          |          |          | 1461.566 |
| b-18 | T* | A  | S  | L  | T  | S | A | A | S* | I  | D  | G  | S  | R  |     | 164.011 | 235.048 | 322.080 | 435.164 | 536.212 | 623.244 | 694.281 | 765.318 | 932.316 | 1045.400 | 1160.427 | 1217.449 | 1304.481 | 1460.582 |
| b-Pi | T* | A  | S  | L  | T  | S | A | A | S* | I  | D  | G  | S  | R  |     | 84.044  | 155.082 | 242.114 | 355.198 | 456.245 | 543.277 | 614.314 | 685.352 | 852.350 | 965.434  | 1080.461 | 1137.482 | 1224.514 | 1380.615 |
| y    | T* | A  | S  | L  | T  | S | A | A | S* | I  | D  | G  | S  | R  |     | 175.119 | 262.151 | 319.172 | 434.199 | 547.283 | 714.282 | 785.319 | 856.356 | 943.388 | 1044.436 | 1157.520 | 1244.552 | 1315.589 | 1496.603 |
| y-17 | T* | A  | S  | L  | T  | S | A | A | S* | I  | D  | G  | S  | R  |     | 158.092 | 245.124 | 302.146 | 417.173 | 530.257 | 697.255 | 768.292 | 839.329 | 926.362 | 1027.409 | 1140.493 | 1227.525 | 1298.562 | 1479.576 |
| y-18 | T* | A  | S  | L  | T  | S | A | A | S* | I  | D  | G  | S  | R  |     |         | 244.140 | 301.162 | 416.189 | 529.273 | 696.271 | 767.308 | 838.345 | 925.378 | 1026.425 | 1139.509 | 1226.541 | 1297.578 | 1478.592 |
| y-Pi | T* | A  | S  | L  | T  | S | A | A | S* | I  | D  | G  | S  | R  |     |         | 164.174 | 221.196 | 336.222 | 449.307 | 616.305 | 687.342 | 758.379 | 845.411 | 946.459  | 1059.543 | 1146.575 | 1217.612 | 1398.626 |
|      | 14 | 13 | 12 | 11 | 10 | 9 | 8 | 7 | 6  | 5  | 4  | 3  | 2  | 1  | Arg | Ser     | Gly     | Asp     | Ile     | Ser     | Ala     | Ala     | Ser     | Thr     | Leu      | Ser      | Ala      | Thr      |          |

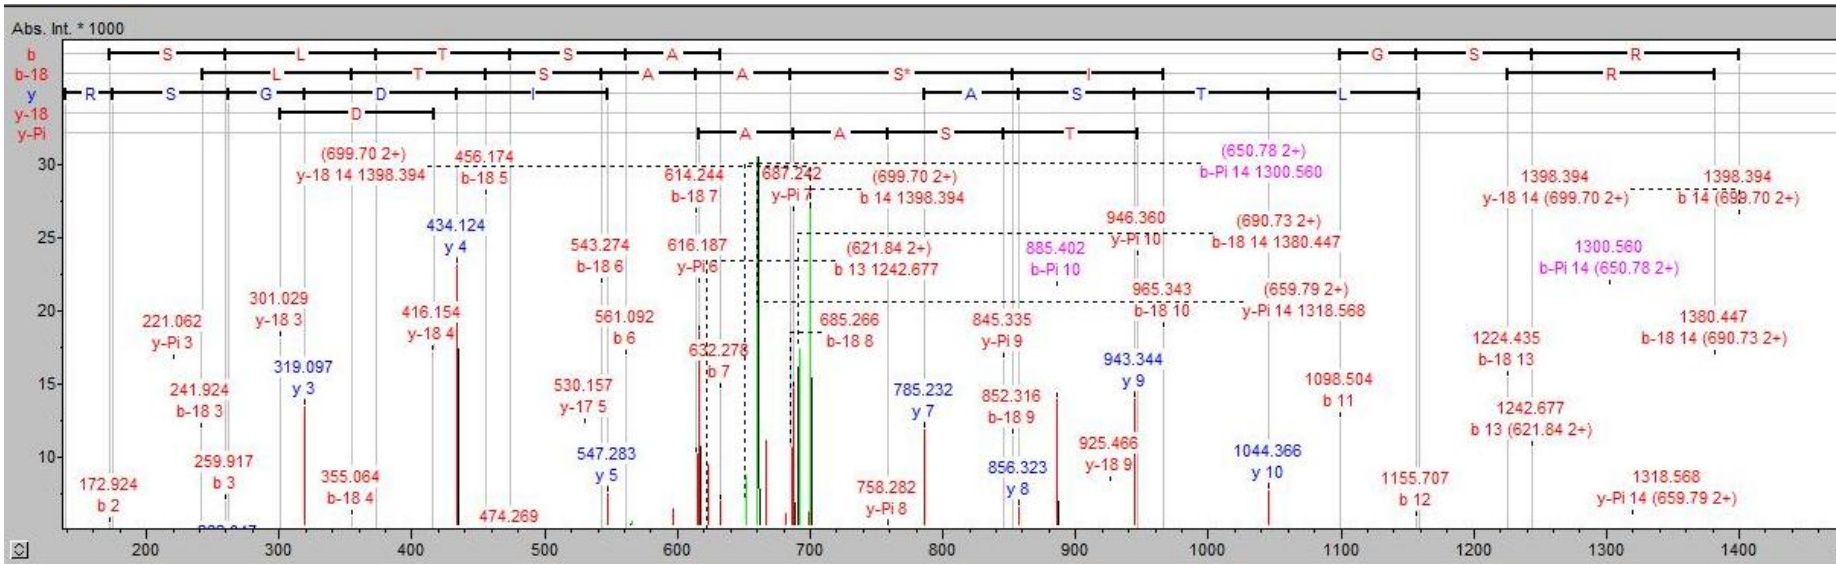

Protein View | Match Errors | MS/MS Fragments | MSMS Analysis

Sequence: TASLTSAA SIDGSR (Peptide Mods: 9: Phospho (ST))

MH+(mono): 1416.637 MH+(avg): 1417.396 MS/MS Tol: 0.500 Da Peaks: 139 Above Threshold: 139 Zoom to m/z for 2+ Zoom +/-: 5 Da

Masses:  Monoisotopic  Average Calculate: Masses Threshold: 0.000 Assigned: 44 Not Assigned: 95 1+, m/z: 0.000

|      | T  | A  | S  | L  | T  | S | A | A | S  | I  | D  | G  | S  | R  | Thr     | Ala     | Ser     | Leu     | Thr     | Ser     | Ala     | Ala     | Ser     | Ile      | Asp      | Gly      | Ser      | Arg      |          |
|------|----|----|----|----|----|---|---|---|----|----|----|----|----|----|---------|---------|---------|---------|---------|---------|---------|---------|---------|----------|----------|----------|----------|----------|----------|
| Ion  | 1  | 2  | 3  | 4  | 5  | 6 | 7 | 8 | 9  | 10 | 11 | 12 | 13 | 14 | 1       | 2       | 3       | 4       | 5       | 6       | 7       | 8       | 9       | 10       | 11       | 12       | 13       | 14       |          |
| b    | T  | A  | S  | L  | T  | S | A | A | S* | I  | D  | G  | S  | R  | 102.055 | 173.092 | 260.124 | 373.208 | 474.256 | 561.288 | 632.325 | 703.362 | 870.360 | 983.445  | 1098.471 | 1155.493 | 1242.525 | 1398.626 |          |
| b-17 | T  | A  | S  | L  | T  | S | A | A | S* | I  | D  | G  | S  | R  | -       | -       | -       | -       | -       | -       | -       | -       | -       | -        | -        | -        | -        | -        | 1381.600 |
| b-18 | T  | A  | S  | L  | T  | S | A | A | S* | I  | D  | G  | S  | R  | 84.044  | 155.082 | 242.114 | 355.198 | 456.245 | 543.277 | 614.314 | 685.352 | 852.350 | 965.434  | 1080.461 | 1137.482 | 1224.514 | 1380.615 |          |
| b-Pi | T  | A  | S  | L  | T  | S | A | A | S* | I  | D  | G  | S  | R  | 4.078   | 75.115  | 162.147 | 275.231 | 376.279 | 463.311 | 534.348 | 605.385 | 772.384 | 885.468  | 1000.495 | 1057.516 | 1144.548 | 1300.649 |          |
| y    | T  | A  | S  | L  | T  | S | A | A | S* | I  | D  | G  | S  | R  | 175.119 | 262.151 | 319.172 | 434.199 | 547.283 | 714.282 | 785.319 | 856.356 | 943.388 | 1044.436 | 1157.520 | 1244.552 | 1315.589 | 1416.637 |          |
| y-17 | T  | A  | S  | L  | T  | S | A | A | S* | I  | D  | G  | S  | R  | 158.092 | 245.124 | 302.146 | 417.173 | 530.257 | 697.255 | 768.292 | 839.329 | 926.362 | 1027.409 | 1140.493 | 1227.525 | 1298.562 | 1399.610 |          |
| y-18 | T  | A  | S  | L  | T  | S | A | A | S* | I  | D  | G  | S  | R  | -       | 244.140 | 301.162 | 416.189 | 529.273 | 696.271 | 767.308 | 838.345 | 925.378 | 1026.425 | 1139.509 | 1226.541 | 1297.578 | 1398.626 |          |
| y-Pi | T  | A  | S  | L  | T  | S | A | A | S* | I  | D  | G  | S  | R  | -       | 164.174 | 221.196 | 336.222 | 449.307 | 616.305 | 687.342 | 758.379 | 845.411 | 946.459  | 1059.543 | 1146.575 | 1217.612 | 1318.660 |          |
|      | 14 | 13 | 12 | 11 | 10 | 9 | 8 | 7 | 6  | 5  | 4  | 3  | 2  | 1  | Arg     | Ser     | Gly     | Asp     | Ile     | Ser     | Ala     | Ala     | Ser     | Thr      | Leu      | Ser      | Ala      | Thr      |          |



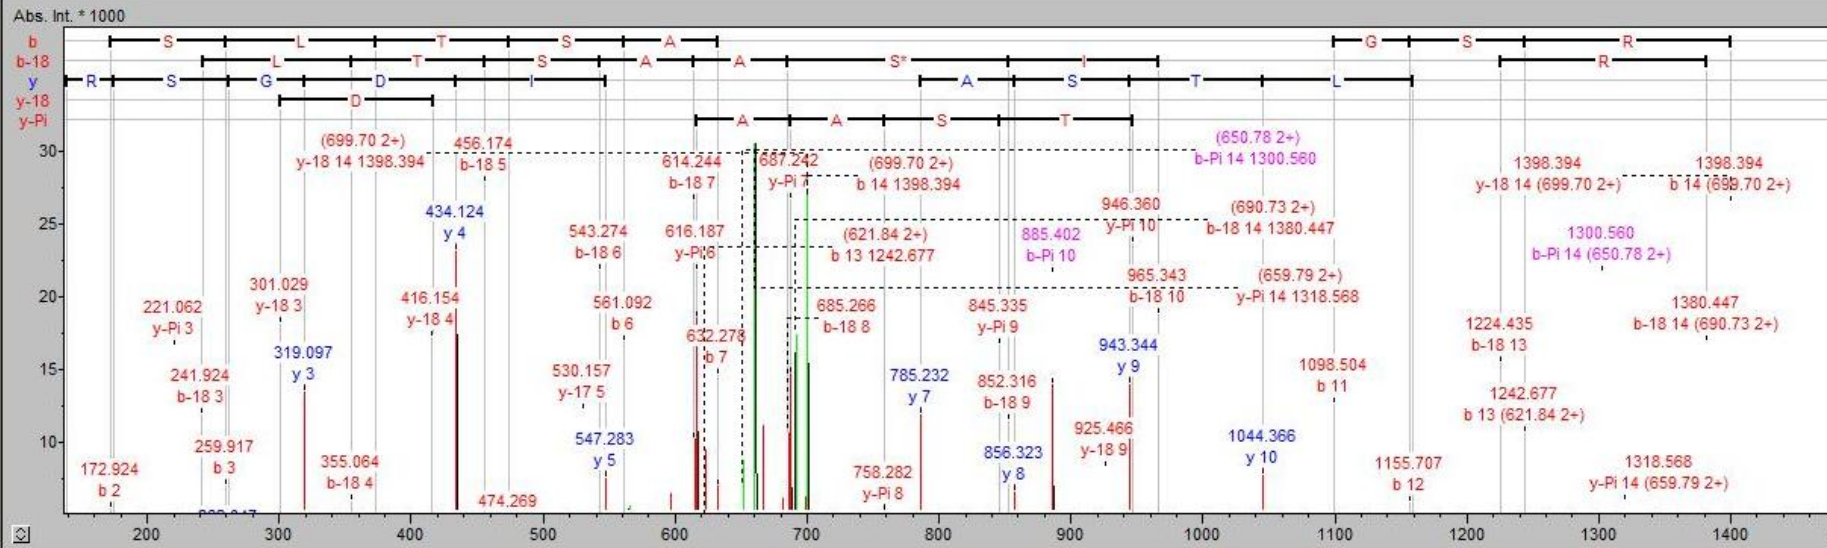

Protein View | Match Errors | MS/MS Fragments | MSMS Analysis

Sequence: T A S L T S A A S\* I D G S R (Peptide Mods: 9: Phospho (ST))

MH+(mono): 1416.637    MH+(avg): 1417.396    MS/MS To1: 0.500 Da    Peaks: 139    Above Threshold: 139    Zoom to m/z for 2+    Zoom +/-: 5 Da

Masses:  Monoisotopic     Average    Calculate: Masses    Threshold: 0.000    Assigned: 44    Not Assigned: 95    1+, m/z: 0.000

|      | T  | A  | S  | L  | T  | S | A | A | S* | I  | D  | G  | S  | R  | Thr     | Ala     | Ser     | Leu     | Thr     | Ser     | Ala     | Ala     | Ser     | Ile      | Asp      | Gly      | Ser      | Arg      |
|------|----|----|----|----|----|---|---|---|----|----|----|----|----|----|---------|---------|---------|---------|---------|---------|---------|---------|---------|----------|----------|----------|----------|----------|
| Ion  | 1  | 2  | 3  | 4  | 5  | 6 | 7 | 8 | 9  | 10 | 11 | 12 | 13 | 14 | 1       | 2       | 3       | 4       | 5       | 6       | 7       | 8       | 9       | 10       | 11       | 12       | 13       | 14       |
| b    | T  | A  | S  | L  | T  | S | A | A | S* | I  | D  | G  | S  | R  | 102.055 | 173.092 | 260.124 | 373.208 | 474.256 | 561.288 | 632.325 | 703.362 | 870.360 | 983.445  | 1098.471 | 1155.493 | 1242.525 | 1398.626 |
| b-17 | T  | A  | S  | L  | T  | S | A | A | S* | I  | D  | G  | S  | R  | -       | -       | -       | -       | -       | -       | -       | -       | -       | -        | -        | -        | -        | 1381.600 |
| b-18 | T  | A  | S  | L  | T  | S | A | A | S* | I  | D  | G  | S  | R  | 84.044  | 155.082 | 242.114 | 355.198 | 456.245 | 543.277 | 614.314 | 685.352 | 852.350 | 965.434  | 1080.461 | 1137.482 | 1224.514 | 1380.615 |
| b-Pi | T  | A  | S  | L  | T  | S | A | A | S* | I  | D  | G  | S  | R  | 4.078   | 75.115  | 162.147 | 275.231 | 376.279 | 463.311 | 534.348 | 605.385 | 772.384 | 885.468  | 1000.495 | 1057.516 | 1144.548 | 1300.649 |
| y    | T  | A  | S  | L  | T  | S | A | A | S* | I  | D  | G  | S  | R  | 175.119 | 262.151 | 319.172 | 434.199 | 547.283 | 714.282 | 785.319 | 856.356 | 943.388 | 1044.436 | 1157.520 | 1244.552 | 1315.589 | 1416.637 |
| y-17 | T  | A  | S  | L  | T  | S | A | A | S* | I  | D  | G  | S  | R  | 158.092 | 245.124 | 302.146 | 417.173 | 530.257 | 697.255 | 768.292 | 839.329 | 926.362 | 1027.409 | 1140.493 | 1227.525 | 1298.562 | 1399.610 |
| y-18 | T  | A  | S  | L  | T  | S | A | A | S* | I  | D  | G  | S  | R  | -       | 244.140 | 301.162 | 416.189 | 529.273 | 696.271 | 767.308 | 838.345 | 925.378 | 1026.425 | 1139.509 | 1226.541 | 1297.578 | 1398.626 |
| y-Pi | T  | A  | S  | L  | T  | S | A | A | S* | I  | D  | G  | S  | R  | -       | 164.174 | 221.196 | 336.222 | 449.307 | 616.305 | 687.342 | 758.379 | 845.411 | 946.459  | 1059.543 | 1146.575 | 1217.612 | 1318.660 |
|      | 14 | 13 | 12 | 11 | 10 | 9 | 8 | 7 | 6  | 5  | 4  | 3  | 2  | 1  | Arg     | Ser     | Gly     | Asp     | Ile     | Ser     | Ala     | Ala     | Ser     | Thr      | Leu      | Ser      | Ala      | Thr      |



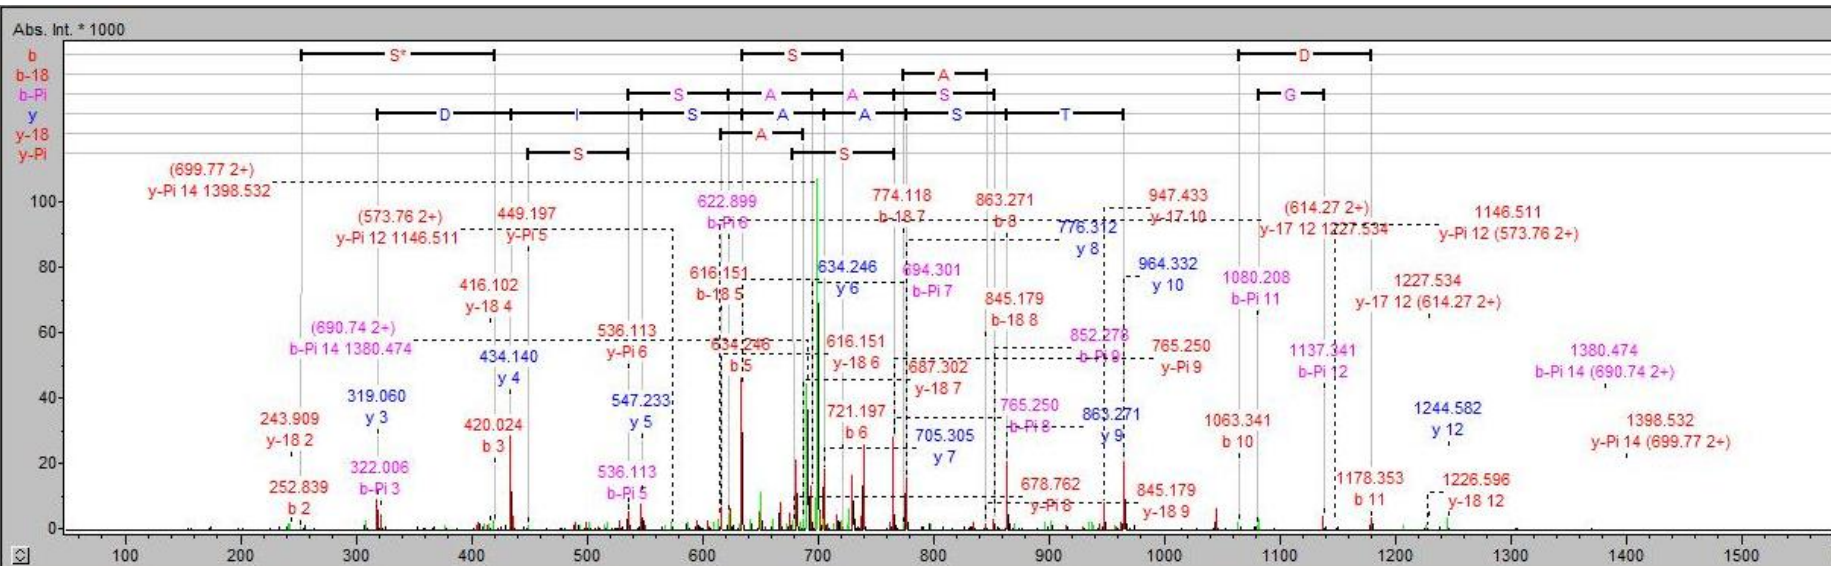

Protein View | Match Errors | MS/MS Fragments | MSMS Analysis

Sequence: T A S L T S A A S I D G S R (Peptide Mods: 1: Phospho (ST) 3: Phospho (ST))

MH+(mono): 1496.603 MH+(avg): 1497.376 MS/MS To: 0.500 Da Peaks: 100 Above Threshold: 100 Zoom to m/z for 2+ Zoom +/-: 5 Da

Masses:  Monoisotopic  Average Calculate: Masses Threshold: 0.000 Assigned: 42 Not Assigned: 58 1+, m/z: 0.000

|      | T  | A  | S  | L  | T  | S | A | A | S | I  | D  | G  | S  | R  | Thr     | Ala     | Ser     | Leu     | Thr     | Ser     | Ala     | Ala     | Ser     | Ile      | Asp      | Gly      | Ser      | Arg      |
|------|----|----|----|----|----|---|---|---|---|----|----|----|----|----|---------|---------|---------|---------|---------|---------|---------|---------|---------|----------|----------|----------|----------|----------|
| Ion  | 1  | 2  | 3  | 4  | 5  | 6 | 7 | 8 | 9 | 10 | 11 | 12 | 13 | 14 | 1       | 2       | 3       | 4       | 5       | 6       | 7       | 8       | 9       | 10       | 11       | 12       | 13       | 14       |
| b    | T* | A  | S* | L  | T  | S | A | A | S | I  | D  | G  | S  | R  | 182.021 | 253.058 | 420.057 | 533.141 | 634.188 | 721.221 | 792.258 | 863.295 | 950.327 | 1063.411 | 1178.438 | 1235.459 | 1322.491 | 1478.592 |
| b-17 | T* | A  | S* | L  | T  | S | A | A | S | I  | D  | G  | S  | R  | -       | -       | -       | -       | -       | -       | -       | -       | -       | -        | -        | -        | -        | 1461.566 |
| b-18 | T* | A  | S* | L  | T  | S | A | A | S | I  | D  | G  | S  | R  | 164.011 | 235.048 | 402.046 | 515.130 | 616.178 | 703.210 | 774.247 | 845.284 | 932.316 | 1045.400 | 1160.427 | 1217.449 | 1304.481 | 1460.582 |
| b-PI | T* | A  | S* | L  | T  | S | A | A | S | I  | D  | G  | S  | R  | 84.044  | 155.082 | 322.080 | 435.164 | 536.212 | 623.244 | 694.281 | 765.318 | 852.350 | 965.434  | 1080.461 | 1137.482 | 1224.514 | 1380.615 |
| y    | T* | A  | S* | L  | T  | S | A | A | S | I  | D  | G  | S  | R  | 175.119 | 262.151 | 319.172 | 434.199 | 547.283 | 634.315 | 705.353 | 776.390 | 863.422 | 964.469  | 1077.553 | 1244.552 | 1315.589 | 1496.603 |
| y-17 | T* | A  | S* | L  | T  | S | A | A | S | I  | D  | G  | S  | R  | 158.092 | 245.124 | 302.146 | 417.173 | 530.257 | 617.289 | 688.326 | 759.363 | 846.395 | 947.443  | 1060.527 | 1227.525 | 1298.562 | 1479.576 |
| y-18 | T* | A  | S* | L  | T  | S | A | A | S | I  | D  | G  | S  | R  | -       | 244.140 | 301.162 | 416.189 | 529.273 | 616.305 | 687.342 | 758.379 | 845.411 | 946.459  | 1059.543 | 1226.541 | 1297.578 | 1478.592 |
| y-PI | T* | A  | S* | L  | T  | S | A | A | S | I  | D  | G  | S  | R  | -       | 164.174 | 221.196 | 336.222 | 449.307 | 536.339 | 607.376 | 678.413 | 765.445 | 866.493  | 979.577  | 1146.575 | 1217.612 | 1398.626 |
|      | 14 | 13 | 12 | 11 | 10 | 9 | 8 | 7 | 6 | 5  | 4  | 3  | 2  | 1  | Arg     | Ser     | Gly     | Asp     | Ile     | Ser     | Ala     | Ala     | Ser     | Thr      | Leu      | Ser      | Ala      | Thr      |

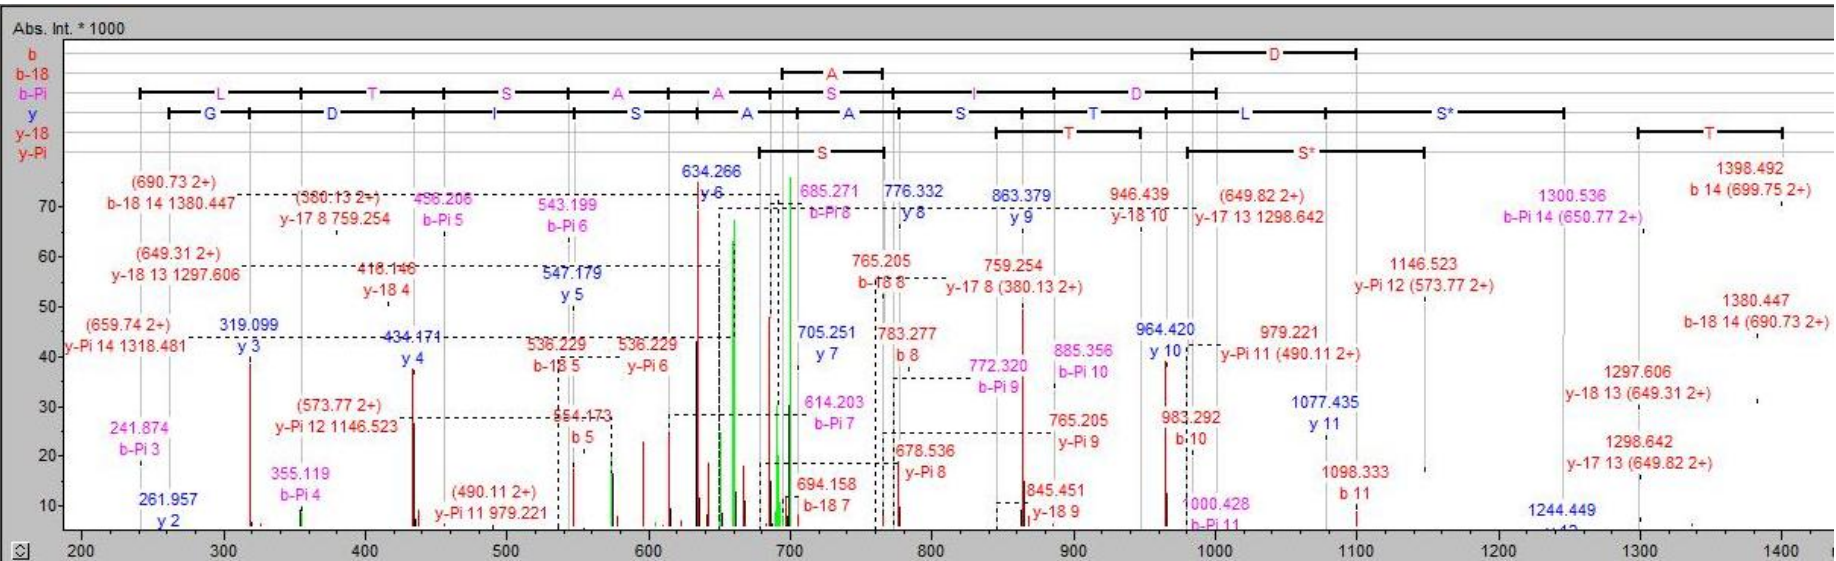

Protein View | Match Errors | MS/MS Fragments | MSMS Analysis

Sequence: **TASL TSAASIDGSR** (Peptide Mods: 3: Phospho (ST))

MH+(mono): 1416.637    MH+(avg): 1417.396    MS/MS Tol: 0.500 Da    Peaks: 119    Above Threshold: 119    Zoom to m/z for 2+    Zoom +/-: 5 Da

Masses:  Monoisotopic     Average    Calculate: Masses    Threshold: 0.000    Assigned: 43    Not Assigned: 76    1+, m/z: 0.000

|      | T  | A  | S  | L  | T  | S | A | S | I | D  | G  | S  | R  | Thr | Ala | Ser | Leu | Thr | Ser | Ala | Ala | Ser | Ile | Asp | Gly | Ser | Arg |     |
|------|----|----|----|----|----|---|---|---|---|----|----|----|----|-----|-----|-----|-----|-----|-----|-----|-----|-----|-----|-----|-----|-----|-----|-----|
| Ion  | 1  | 2  | 3  | 4  | 5  | 6 | 7 | 8 | 9 | 10 | 11 | 12 | 13 | 14  | 1   | 2   | 3   | 4   | 5   | 6   | 7   | 8   | 9   | 10  | 11  | 12  | 13  | 14  |
| b    | T  | A  | S* | L  | T  | S | A | A | S | I  | D  | G  | S  | R   |     |     |     |     |     |     |     |     |     |     |     |     |     |     |
| b-17 | T  | A  | S* | L  | T  | S | A | A | S | I  | D  | G  | S  | R   |     |     |     |     |     |     |     |     |     |     |     |     |     |     |
| b-18 | T  | A  | S* | L  | T  | S | A | A | S | I  | D  | G  | S  | R   |     |     |     |     |     |     |     |     |     |     |     |     |     |     |
| b-PI | T  | A  | S* | L  | T  | S | A | A | S | I  | D  | G  | S  | R   |     |     |     |     |     |     |     |     |     |     |     |     |     |     |
| y    | T  | A  | S* | L  | T  | S | A | A | S | I  | D  | G  | S  | R   |     |     |     |     |     |     |     |     |     |     |     |     |     |     |
| y-17 | T  | A  | S* | L  | T  | S | A | A | S | I  | D  | G  | S  | R   |     |     |     |     |     |     |     |     |     |     |     |     |     |     |
| y-18 | T  | A  | S* | L  | T  | S | A | A | S | I  | D  | G  | S  | R   |     |     |     |     |     |     |     |     |     |     |     |     |     |     |
| y-PI | T  | A  | S* | L  | T  | S | A | A | S | I  | D  | G  | S  | R   |     |     |     |     |     |     |     |     |     |     |     |     |     |     |
|      | 14 | 13 | 12 | 11 | 10 | 9 | 8 | 7 | 6 | 5  | 4  | 3  | 2  | 1   | Arg | Ser | Gly | Asp | Ile | Ser | Ala | Ala | Ser | Thr | Leu | Ser | Ala | Thr |



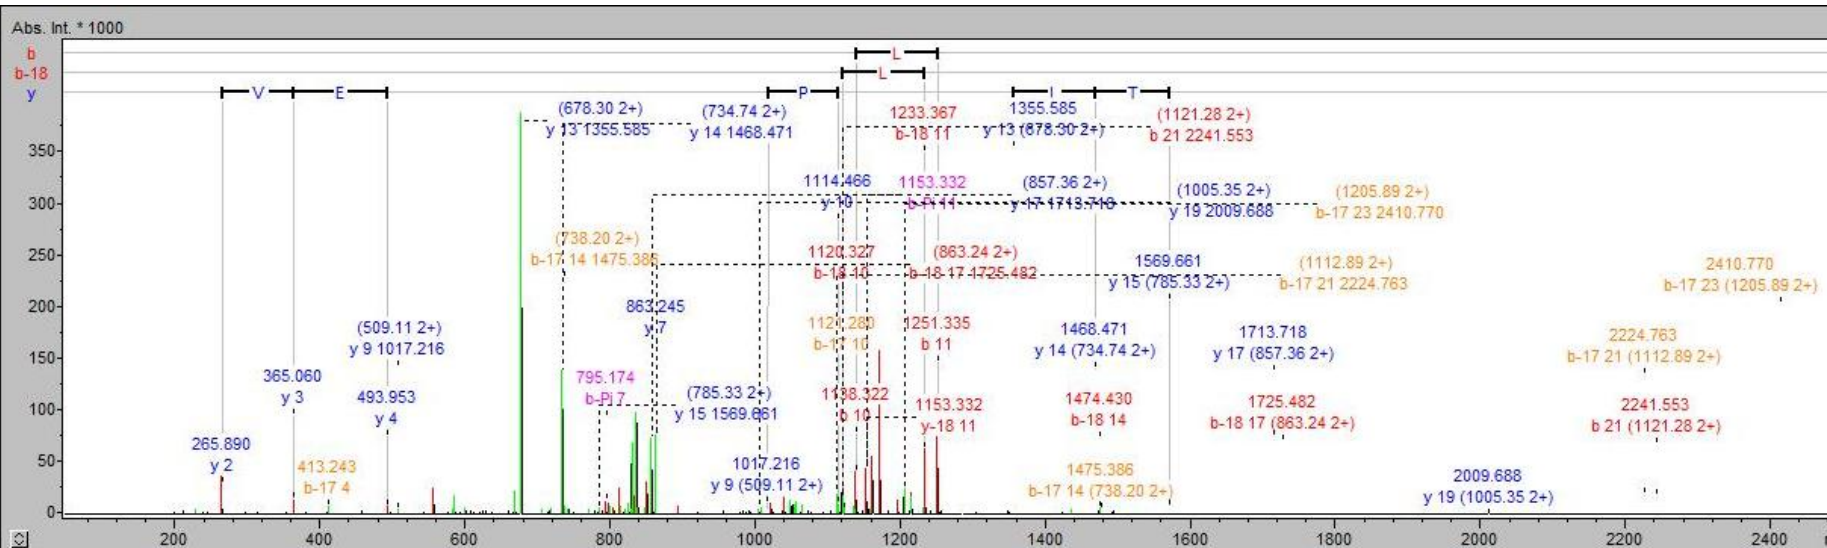

Protein View | Match Errors | MS/MS Fragments | MSMS Analysis

Sequence: **TLSQSS<sup>5</sup>ESGTLPSGPPGHTMEVSC** (Peptide Mods: 5: Phospho (ST) 6: Phospho (ST) 24: Carbamidomethyl (C))

MH+(mono): 2606.019    MH+(avg): 2607.598    MS/MS ToJ: 0.500    Da    Peaks: 72    Above Threshold: 72    Zoom to m/z for 2+    Zoom +/-: 5    Da

Masses:  Monoisotopic     Average    Calculate: Masses    Threshold: 0.000    Assigned: 26    Not Assigned: 46    1+, m/z: 0.000

|      | T  | L  | S  | Q  | S              | S              | E  | S  | G  | T  | L  | P  | S  | G  | P  | P  | G  | H  | T  | M  | E  | V  | S  | C               | Thr     | Leu     | Ser     | Gln     | Ser     | Ser     | Glu     | Ser     | Gly      | Thr      | Leu      | I  |    |
|------|----|----|----|----|----------------|----------------|----|----|----|----|----|----|----|----|----|----|----|----|----|----|----|----|----|-----------------|---------|---------|---------|---------|---------|---------|---------|---------|----------|----------|----------|----|----|
| Ion  | 1  | 2  | 3  | 4  | 5              | 6              | 7  | 8  | 9  | 10 | 11 | 12 | 13 | 14 | 15 | 16 | 17 | 18 | 19 | 20 | 21 | 22 | 23 | 24              | 1       | 2       | 3       | 4       | 5       | 6       | 7       | 8       | 9        | 10       | 11       | 12 |    |
| b    | T  | L  | S  | Q  | S <sup>5</sup> | S <sup>5</sup> | E  | S  | G  | T  | L  | P  | S  | G  | P  | P  | G  | H  | T  | M  | E  | V  | S  | C <sup>24</sup> | 102.055 | 215.139 | 302.171 | 430.230 | 597.228 | 764.226 | 893.269 | 980.301 | 1037.322 | 1138.370 | 1251.454 | 13 |    |
| b-17 | T  | L  | S  | Q  | S <sup>5</sup> | S <sup>5</sup> | E  | S  | G  | T  | L  | P  | S  | G  | P  | P  | G  | H  | T  | M  | E  | V  | S  | C <sup>24</sup> | -       | -       | -       | 413.203 | 580.201 | 747.200 | 876.242 | 963.274 | 1020.296 | 1121.344 | 1234.428 | 13 |    |
| b-18 | T  | L  | S  | Q  | S <sup>5</sup> | S <sup>5</sup> | E  | S  | G  | T  | L  | P  | S  | G  | P  | P  | G  | H  | T  | M  | E  | V  | S  | C <sup>24</sup> | 84.044  | 197.128 | 284.160 | 412.219 | 579.217 | 746.216 | 875.258 | 962.290 | 1019.312 | 1120.360 | 1233.444 | 13 |    |
| b-P1 | T  | L  | S  | Q  | S <sup>5</sup> | S <sup>5</sup> | E  | S  | G  | T  | L  | P  | S  | G  | P  | P  | G  | H  | T  | M  | E  | V  | S  | C <sup>24</sup> | 4.078   | 117.162 | 204.194 | 332.253 | 499.251 | 666.249 | 795.292 | 882.324 | 939.346  | 1040.393 | 1153.477 | 12 |    |
| y    | T  | L  | S  | Q  | S <sup>5</sup> | S <sup>5</sup> | E  | S  | G  | T  | L  | P  | S  | G  | P  | P  | G  | H  | T  | M  | E  | V  | S  | C <sup>24</sup> | 179.048 | 266.081 | 365.149 | 494.192 | 625.232 | 726.280 | 863.339 | 920.360 | 1017.413 | 1114.466 | 1171.487 | 12 |    |
| y-17 | T  | L  | S  | Q  | S <sup>5</sup> | S <sup>5</sup> | E  | S  | G  | T  | L  | P  | S  | G  | P  | P  | G  | H  | T  | M  | E  | V  | S  | C <sup>24</sup> | -       | -       | -       | -       | -       | -       | -       | -       | -        | -        | -        | -  | 12 |
| y-18 | T  | L  | S  | Q  | S <sup>5</sup> | S <sup>5</sup> | E  | S  | G  | T  | L  | P  | S  | G  | P  | P  | G  | H  | T  | M  | E  | V  | S  | C <sup>24</sup> | -       | 248.070 | 347.138 | 476.181 | 607.221 | 708.269 | 845.328 | 902.349 | 999.402  | 1096.455 | 1153.476 | 12 |    |
| y-P1 | T  | L  | S  | Q  | S <sup>5</sup> | S <sup>5</sup> | E  | S  | G  | T  | L  | P  | S  | G  | P  | P  | G  | H  | T  | M  | E  | V  | S  | C <sup>24</sup> | -       | 168.104 | 267.172 | 396.215 | 527.255 | 628.303 | 765.362 | 822.383 | 919.436  | 1016.489 | 1073.510 | 11 |    |
|      | 24 | 23 | 22 | 21 | 20             | 19             | 18 | 17 | 16 | 15 | 14 | 13 | 12 | 11 | 10 | 9  | 8  | 7  | 6  | 5  | 4  | 3  | 2  | 1               | Cys     | Ser     | Val     | Glu     | Met     | Thr     | His     | Gly     | Pro      | Pro      | Gly      | I  |    |

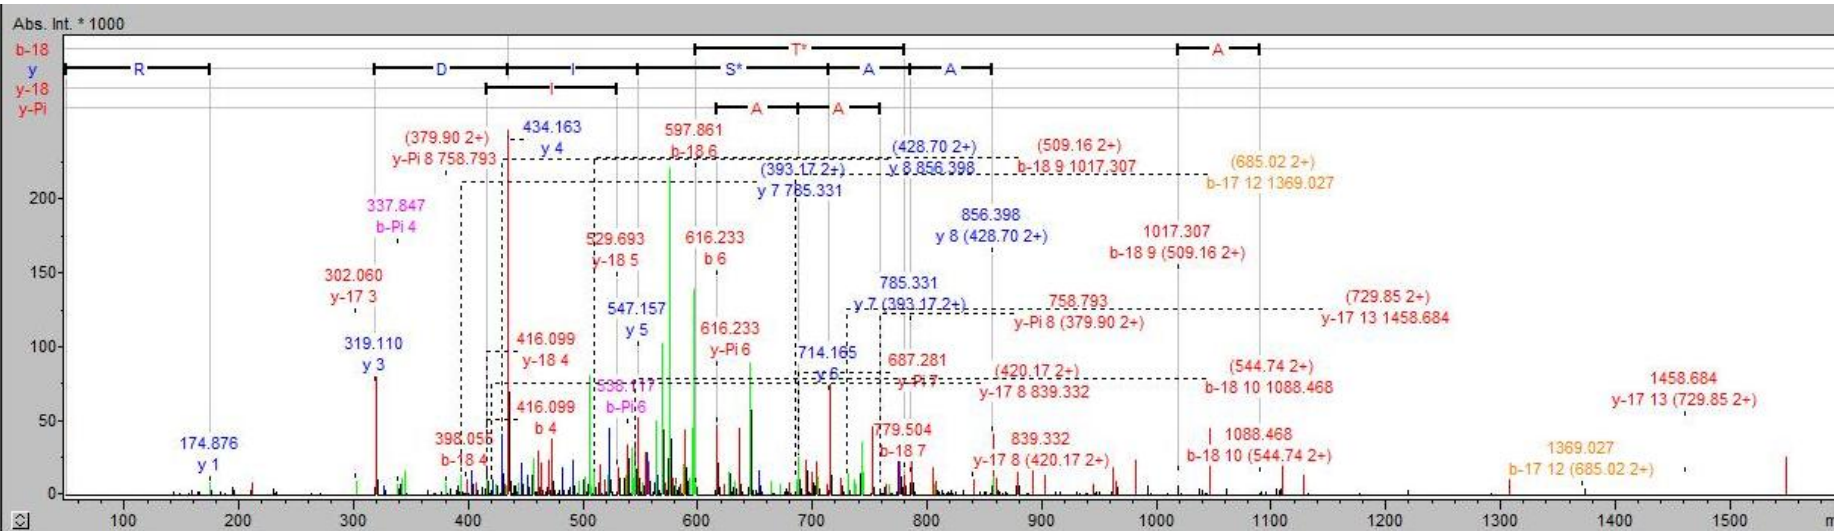

Protein View | Match Errors | MS/MS Fragments | MSMS Analysis

Sequence: SRTASLTSAASIDGSR (Peptide Mods: 7: Phospho (ST) 8: Phospho (ST) 11: Phospho (ST))

MH+(mono): 1819.702 MH+(avg): 1820.619 MS/MS Tol: 0.500 Da Peaks: 107 Above Threshold: 107 Zoom to m/z for 2+ Zoom +/-: 5 Da

Masses:  Monoisotopic  Average Calculate: Masses Threshold: 0.000 Assigned: 25 Not Assigned: 82 1+, m/z: 0.000

|      | S  | R  | T  | A  | S  | L  | T* | S* | A | A  | S* | I  | D  | G  | S  | R  | Ser     | Arg     | Thr     | Ala     | Ser     | Leu     | Thr     | Ser     | Ala      | Ala      | Ser      | Ile      | Asp      | G  |
|------|----|----|----|----|----|----|----|----|---|----|----|----|----|----|----|----|---------|---------|---------|---------|---------|---------|---------|---------|----------|----------|----------|----------|----------|----|
| Ion  | 1  | 2  | 3  | 4  | 5  | 6  | 7  | 8  | 9 | 10 | 11 | 12 | 13 | 14 | 15 | 16 | 1       | 2       | 3       | 4       | 5       | 6       | 7       | 8       | 9        | 10       | 11       | 12       | 13       | 14 |
| b    | S  | R  | T  | A  | S  | L  | T* | S* | A | A  | S* | I  | D  | G  | S  | R  | 88.039  | 244.140 | 345.188 | 416.225 | 503.257 | 616.341 | 797.355 | 964.354 | 1035.391 | 1106.428 | 1273.426 | 1386.510 | 1501.537 | 15 |
| b-17 | S  | R  | T  | A  | S  | L  | T* | S* | A | A  | S* | I  | D  | G  | S  | R  | -       | 227.114 | 328.162 | 399.199 | 486.231 | 599.315 | 780.329 | 947.327 | 1018.364 | 1089.401 | 1256.400 | 1369.484 | 1484.511 | 15 |
| b-18 | S  | R  | T  | A  | S  | L  | T* | S* | A | A  | S* | I  | D  | G  | S  | R  | 70.029  | 226.130 | 327.178 | 398.215 | 485.247 | 598.331 | 779.345 | 946.343 | 1017.380 | 1088.417 | 1255.416 | 1368.500 | 1483.527 | 15 |
| b-Pi | S  | R  | T  | A  | S  | L  | T* | S* | A | A  | S* | I  | D  | G  | S  | R  | -       | 166.039 | 267.086 | 338.123 | 425.156 | 538.240 | 719.254 | 886.252 | 957.289  | 1028.326 | 1195.325 | 1308.409 | 1423.436 | 14 |
| y    | S  | R  | T  | A  | S  | L  | T* | S* | A | A  | S* | I  | D  | G  | S  | R  | 175.119 | 262.151 | 319.172 | 434.199 | 547.283 | 714.282 | 785.319 | 856.356 | 1023.354 | 1204.368 | 1317.452 | 1404.484 | 1475.522 | 15 |
| y-17 | S  | R  | T  | A  | S  | L  | T* | S* | A | A  | S* | I  | D  | G  | S  | R  | 158.092 | 245.124 | 302.146 | 417.173 | 530.257 | 697.255 | 768.292 | 839.329 | 1006.328 | 1187.342 | 1300.426 | 1387.458 | 1458.495 | 15 |
| y-18 | S  | R  | T  | A  | S  | L  | T* | S* | A | A  | S* | I  | D  | G  | S  | R  | -       | 244.140 | 301.162 | 416.189 | 529.273 | 696.271 | 767.308 | 838.345 | 1005.344 | 1186.358 | 1299.442 | 1386.474 | 1457.511 | 15 |
| y-Pi | S  | R  | T  | A  | S  | L  | T* | S* | A | A  | S* | I  | D  | G  | S  | R  | -       | 164.174 | 221.196 | 336.222 | 449.307 | 616.305 | 687.342 | 758.379 | 925.378  | 1106.392 | 1219.476 | 1306.508 | 1377.545 | 14 |
|      | 16 | 15 | 14 | 13 | 12 | 11 | 10 | 9  | 8 | 7  | 6  | 5  | 4  | 3  | 2  | 1  | Arg     | Ser     | Gly     | Asp     | Ile     | Ser     | Ala     | Ala     | Ser      | Thr      | Leu      | Ser      | Ala      | T  |



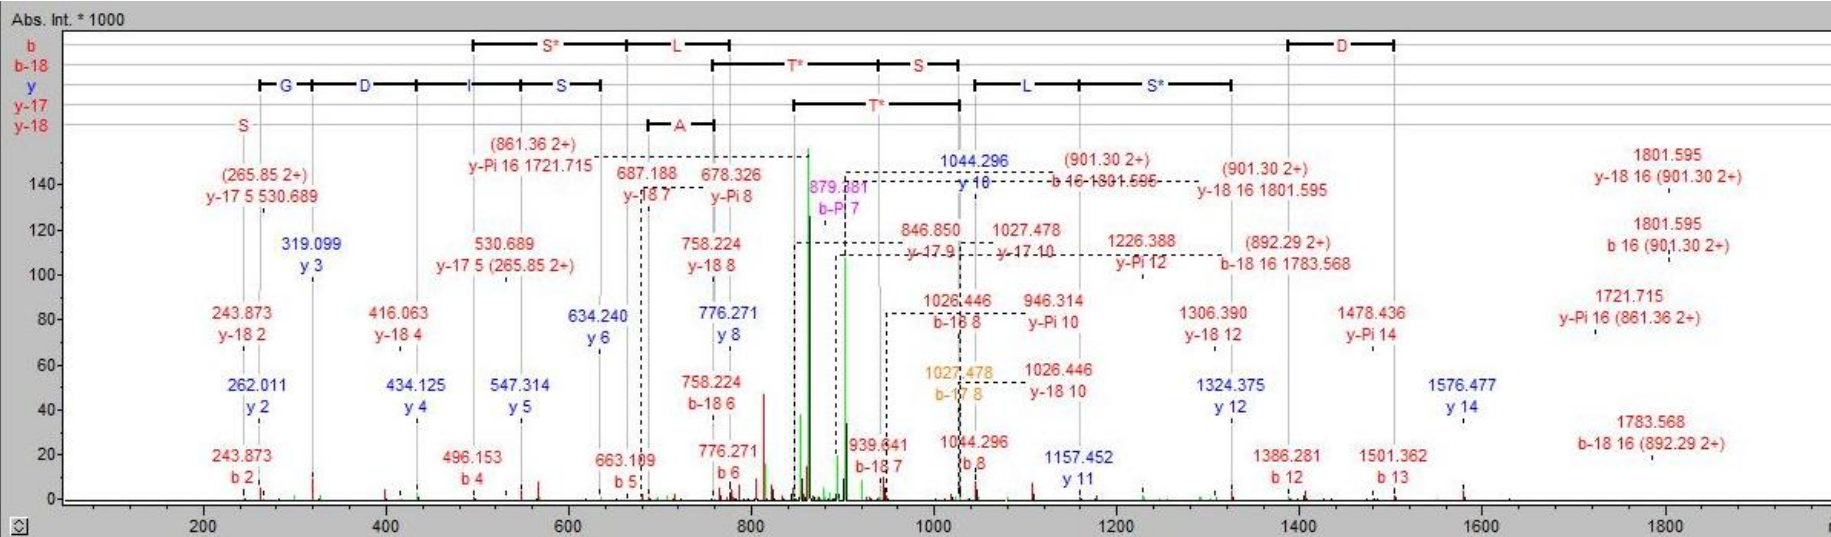

Sequence: **SRTASLTSAAASIDGSR** (Peptide Mods: 3: Phospho (ST) 5: Phospho (ST) 7: Phospho (ST) )

MH+(mono): 1819.702    MH+(avg): 1820.619    MS/MS Tol: 0.500 Da    Peaks: 86    Above Threshold: 86    Zoom to m/z for 2+    Zoom +/-: 5 Da  
 Masses:  Monoisotopic     Average    Calculate: Masses    Threshold: 0.000    Assigned: 39    Not Assigned: 47    1+, m/z: 0.000

|      | S  | R  | T  | A  | S  | L  | T  | S | A | A  | S  | I  | D  | G  | S  | R  | Ser     | Arg     | Thr     | Ala     | Ser     | Leu     | Thr     | Ser      | Ala      | Ala      | Ser      | Ile      | Asp      |    |
|------|----|----|----|----|----|----|----|---|---|----|----|----|----|----|----|----|---------|---------|---------|---------|---------|---------|---------|----------|----------|----------|----------|----------|----------|----|
| Ion  | 1  | 2  | 3  | 4  | 5  | 6  | 7  | 8 | 9 | 10 | 11 | 12 | 13 | 14 | 15 | 16 | 1       | 2       | 3       | 4       | 5       | 6       | 7       | 8        | 9        | 10       | 11       | 12       | 13       | 14 |
| b    | S  | R  | T* | A  | S* | L  | T* | S | A | A  | S  | I  | D  | G  | S  | R  | 88.039  | 244.140 | 425.154 | 496.192 | 663.190 | 776.274 | 957.288 | 1044.320 | 1115.357 | 1186.394 | 1273.426 | 1386.510 | 1501.537 |    |
| b-17 | S  | R  | T* | A  | S* | L  | T* | S | A | A  | S  | I  | D  | G  | S  | R  | -       | 227.114 | 408.128 | 479.165 | 646.163 | 759.247 | 940.261 | 1027.293 | 1098.331 | 1169.368 | 1256.400 | 1369.484 | 1484.511 |    |
| b-18 | S  | R  | T* | A  | S* | L  | T* | S | A | A  | S  | I  | D  | G  | S  | R  | 70.029  | 226.130 | 407.144 | 478.181 | 645.179 | 758.263 | 939.277 | 1026.309 | 1097.347 | 1168.384 | 1255.416 | 1368.500 | 1483.527 |    |
| b-Pi | S  | R  | T* | A  | S* | L  | T* | S | A | A  | S  | I  | D  | G  | S  | R  | -       | 166.039 | 347.053 | 418.090 | 585.088 | 698.172 | 879.186 | 966.218  | 1037.255 | 1108.293 | 1195.325 | 1308.409 | 1423.436 |    |
| y    | S  | R  | T* | A  | S* | L  | T* | S | A | A  | S  | I  | D  | G  | S  | R  | 175.119 | 262.151 | 319.172 | 434.199 | 547.283 | 634.315 | 705.353 | 776.390  | 863.422  | 1044.436 | 1157.520 | 1324.518 | 1395.555 |    |
| y-17 | S  | R  | T* | A  | S* | L  | T* | S | A | A  | S  | I  | D  | G  | S  | R  | 158.092 | 245.124 | 302.146 | 417.173 | 530.257 | 617.289 | 688.326 | 759.363  | 846.395  | 1027.409 | 1140.493 | 1307.492 | 1378.529 |    |
| y-18 | S  | R  | T* | A  | S* | L  | T* | S | A | A  | S  | I  | D  | G  | S  | R  | -       | 244.140 | 301.162 | 416.189 | 529.273 | 616.305 | 687.342 | 758.379  | 845.411  | 1026.425 | 1139.509 | 1306.508 | 1377.545 |    |
| y-Pi | S  | R  | T* | A  | S* | L  | T* | S | A | A  | S  | I  | D  | G  | S  | R  | -       | 164.174 | 221.196 | 336.222 | 449.307 | 536.339 | 607.376 | 678.413  | 765.445  | 946.459  | 1059.543 | 1226.541 | 1297.578 |    |
|      | 16 | 15 | 14 | 13 | 12 | 11 | 10 | 9 | 8 | 7  | 6  | 5  | 4  | 3  | 2  | 1  | Arg     | Ser     | Gly     | Asp     | Ile     | Ser     | Ala     | Ala      | Ser      | Thr      | Leu      | Ser      | Ala      |    |

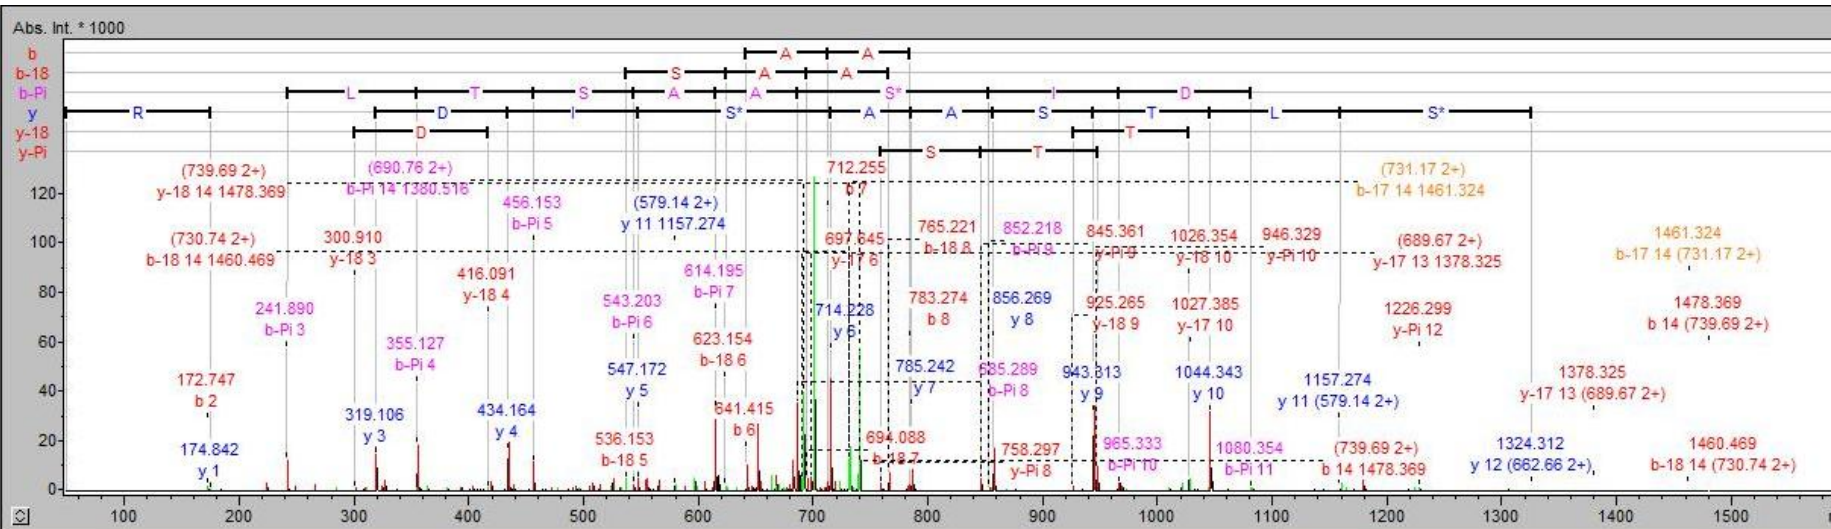

Protein View | Match Errors | MS/MS Fragments | MSMS Analysis

Sequence: T A S L T S A A S I D G S R (Peptide Mods: 3: Phospho (ST) 9: Phospho (ST))

MH+(mono): 1496.603 MH+(avg): 1497.376 MS/MS Tol: 0.500 Da Peaks: 115 Above Threshold: 115 Zoom to m/z for 2+ Zoom +/-: 5 Da  
 Masses:  Monoisotopic  Average Calculate: Masses Threshold: 0.000 Assigned: 45 Not Assigned: 70 1+, m/z: 0.000

|      | T  | A  | S  | L  | T  | S | A | A | S  | I  | D  | G  | S  | R  | Thr | Ala     | Ser     | Leu     | Thr     | Ser     | Ala     | Ala     | Ser     | Ile     | Asp      | Gly      | Ser      | Arg      |          |
|------|----|----|----|----|----|---|---|---|----|----|----|----|----|----|-----|---------|---------|---------|---------|---------|---------|---------|---------|---------|----------|----------|----------|----------|----------|
| Ion  | 1  | 2  | 3  | 4  | 5  | 6 | 7 | 8 | 9  | 10 | 11 | 12 | 13 | 14 | 1   | 2       | 3       | 4       | 5       | 6       | 7       | 8       | 9       | 10      | 11       | 12       | 13       | 14       |          |
| b    | T  | A  | S* | L  | T  | S | A | A | S* | I  | D  | G  | S  | R  |     | 102.055 | 173.092 | 340.090 | 453.174 | 554.222 | 641.254 | 712.291 | 783.328 | 950.327 | 1063.411 | 1178.438 | 1235.459 | 1322.491 | 1478.592 |
| b-17 | T  | A  | S* | L  | T  | S | A | A | S* | I  | D  | G  | S  | R  |     | -       | -       | -       | -       | -       | -       | -       | -       | -       | -        | -        | -        | -        | 1461.566 |
| b-18 | T  | A  | S* | L  | T  | S | A | A | S* | I  | D  | G  | S  | R  |     | 84.044  | 155.082 | 322.080 | 435.164 | 536.212 | 623.244 | 694.281 | 765.318 | 932.316 | 1045.400 | 1160.427 | 1217.449 | 1304.481 | 1460.582 |
| b-Pi | T  | A  | S* | L  | T  | S | A | A | S* | I  | D  | G  | S  | R  |     | 4.078   | 75.115  | 242.114 | 355.198 | 456.245 | 543.277 | 614.314 | 685.352 | 852.350 | 965.434  | 1080.461 | 1137.482 | 1224.514 | 1380.615 |
| y    | T  | A  | S* | L  | T  | S | A | A | S* | I  | D  | G  | S  | R  |     | 175.119 | 262.151 | 319.172 | 434.199 | 547.283 | 714.282 | 785.319 | 856.356 | 943.388 | 1044.436 | 1157.520 | 1324.518 | 1395.555 | 1496.603 |
| y-17 | T  | A  | S* | L  | T  | S | A | A | S* | I  | D  | G  | S  | R  |     | 158.092 | 245.124 | 302.146 | 417.173 | 530.257 | 697.255 | 768.292 | 839.329 | 926.362 | 1027.409 | 1140.493 | 1307.492 | 1378.529 | 1479.576 |
| y-18 | T  | A  | S* | L  | T  | S | A | A | S* | I  | D  | G  | S  | R  |     | -       | 244.140 | 301.162 | 416.189 | 529.273 | 696.271 | 767.308 | 838.345 | 925.378 | 1026.425 | 1139.509 | 1306.508 | 1377.545 | 1478.592 |
| y-Pi | T  | A  | S* | L  | T  | S | A | A | S* | I  | D  | G  | S  | R  |     | -       | 164.174 | 221.196 | 336.222 | 449.307 | 616.305 | 687.342 | 758.379 | 845.411 | 946.459  | 1059.543 | 1226.541 | 1297.578 | 1398.626 |
|      | 14 | 13 | 12 | 11 | 10 | 9 | 8 | 7 | 6  | 5  | 4  | 3  | 2  | 1  | Arg | Ser     | Gly     | Asp     | Ile     | Ser     | Ala     | Ala     | Ser     | Thr     | Leu      | Ser      | Ala      | Thr      |          |





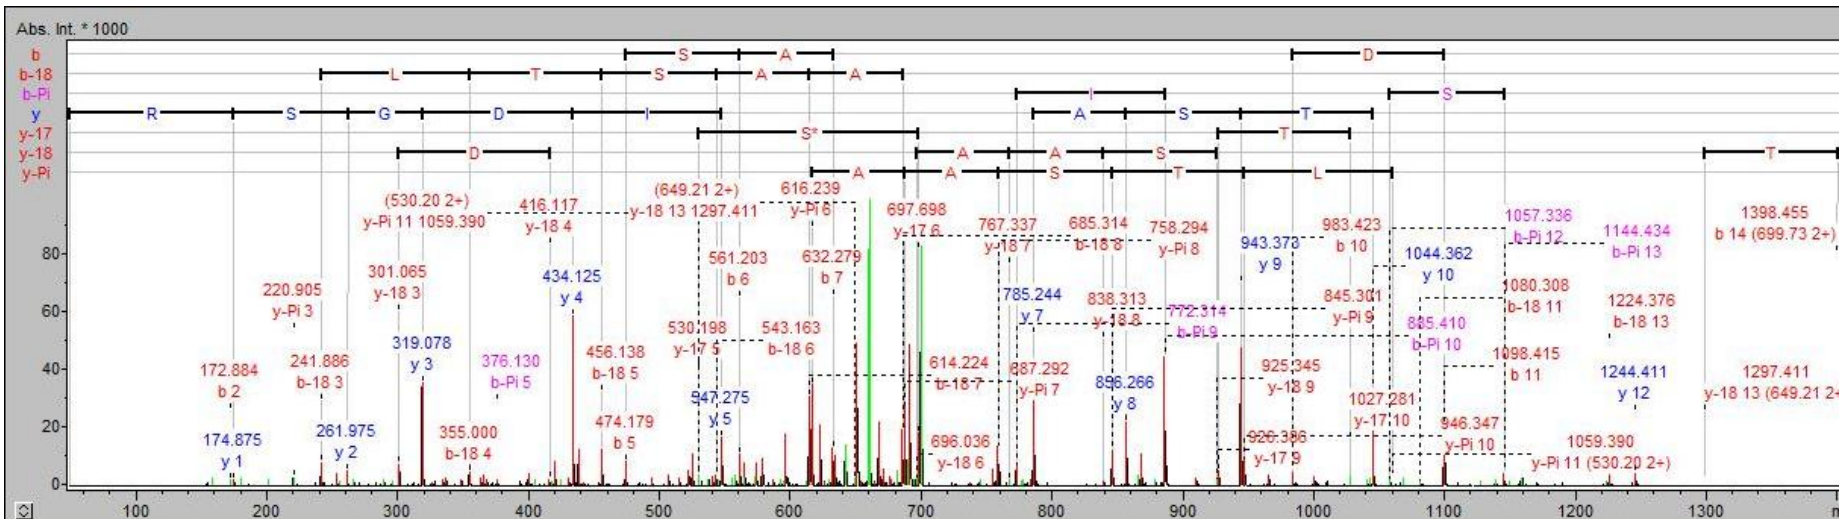

Protein View | Match Errors | MS/MS Fragments | MSMS Analysis

Sequence: **TASLTSAAIDGSR** (Peptide Mods: 9: Phospho (ST))

MH+(mono): 1416.637    MH+(avg): 1417.396    MS/MS Tot: 0.500    Da    Peaks: 128    Above Threshold: 128    Zoom to m/z for 2+:    Zoom +/-: 5    Da

Masses:  Monoisotopic     Average    Calculate: Masses    Threshold: 0.000    Assigned: 50    Not Assigned: 78    1+, m/z: 0.000

|      | T  | A  | S  | L  | T  | S | A | A | S  | I  | D  | G  | S  | R  | Thr | Ala     | Ser     | Leu     | Thr     | Ser     | Ala     | Ala     | Ser     | Ile     | Asp      | Gly      | Ser      | Arg      |          |
|------|----|----|----|----|----|---|---|---|----|----|----|----|----|----|-----|---------|---------|---------|---------|---------|---------|---------|---------|---------|----------|----------|----------|----------|----------|
| Ion  | 1  | 2  | 3  | 4  | 5  | 6 | 7 | 8 | 9  | 10 | 11 | 12 | 13 | 14 | 1   | 2       | 3       | 4       | 5       | 6       | 7       | 8       | 9       | 10      | 11       | 12       | 13       | 14       |          |
| b    | T  | A  | S  | L  | T  | S | A | A | S* | I  | D  | G  | S  | R  |     | 102.055 | 173.092 | 260.124 | 373.208 | 474.256 | 561.288 | 632.325 | 703.362 | 870.360 | 983.445  | 1098.471 | 1155.493 | 1242.525 | 1398.626 |
| b-17 | T  | A  | S  | L  | T  | S | A | A | S* | I  | D  | G  | S  | R  |     |         |         |         |         |         |         |         |         |         |          |          |          |          | 1381.600 |
| b-18 | T  | A  | S  | L  | T  | S | A | A | S* | I  | D  | G  | S  | R  |     | 84.044  | 155.082 | 242.114 | 355.198 | 456.245 | 543.277 | 614.314 | 685.352 | 852.350 | 965.434  | 1080.461 | 1137.482 | 1224.514 | 1380.615 |
| b-Pi | T  | A  | S  | L  | T  | S | A | A | S* | I  | D  | G  | S  | R  |     | 4.078   | 75.115  | 162.147 | 275.231 | 376.279 | 463.311 | 534.348 | 605.385 | 772.384 | 885.468  | 1000.495 | 1057.516 | 1144.548 | 1300.649 |
| y    | T  | A  | S  | L  | T  | S | A | A | S* | I  | D  | G  | S  | R  |     | 175.119 | 262.151 | 319.172 | 434.199 | 547.283 | 714.282 | 785.319 | 856.356 | 943.388 | 1044.436 | 1157.520 | 1244.552 | 1315.589 | 1416.637 |
| y-17 | T  | A  | S  | L  | T  | S | A | A | S* | I  | D  | G  | S  | R  |     | 158.092 | 245.124 | 302.146 | 417.173 | 530.257 | 697.255 | 768.292 | 839.329 | 926.362 | 1027.409 | 1140.493 | 1227.525 | 1298.562 | 1399.610 |
| y-18 | T  | A  | S  | L  | T  | S | A | A | S* | I  | D  | G  | S  | R  |     |         | 244.140 | 301.162 | 416.189 | 529.273 | 696.271 | 767.308 | 838.345 | 925.378 | 1026.425 | 1139.509 | 1226.541 | 1297.578 | 1398.626 |
| y-Pi | T  | A  | S  | L  | T  | S | A | A | S* | I  | D  | G  | S  | R  |     |         | 164.174 | 221.196 | 336.222 | 449.307 | 616.305 | 687.342 | 758.379 | 845.411 | 946.459  | 1059.543 | 1146.575 | 1217.612 | 1318.660 |
|      | 14 | 13 | 12 | 11 | 10 | 9 | 8 | 7 | 6  | 5  | 4  | 3  | 2  | 1  | Arg | Ser     | Gly     | Asp     | Ile     | Ser     | Ala     | Ala     | Ser     | Thr     | Leu      | Ser      | Ala      | Thr      |          |



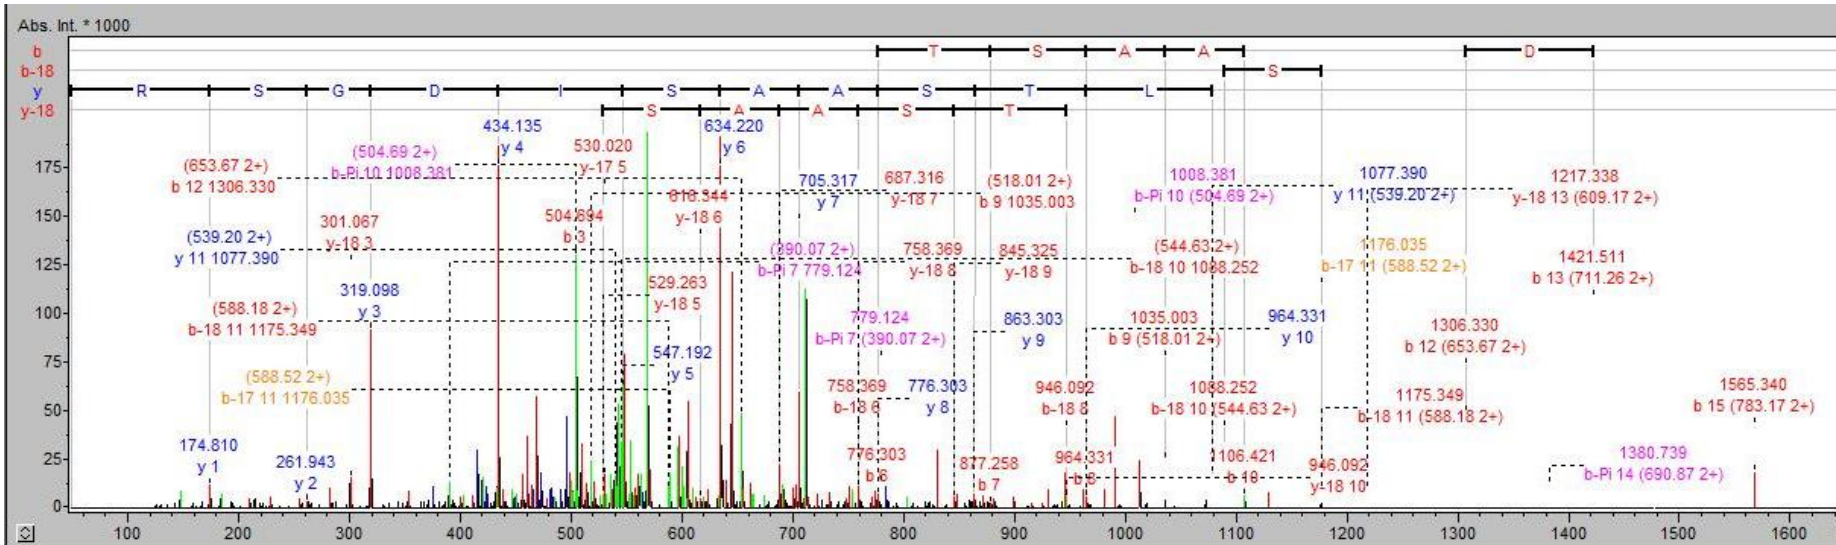

Protein View | Match Errors | MS/MS Fragments | MSMS Analysis

Sequence: **SRTASLTSAA SIDGSR** (Peptide Mods: 1: Phospho (ST) 3: Phospho (ST))

MH+(mono): 1739.736    MH+(avg): 1740.639    MS/MS Tol: 0.500 Da    Peaks: 126    Above Threshold: 126    Zoom to m/z for 2+    Zoom +/-: 5 Da

Masses:  Monoisotopic     Average    Calculate: Masses    Threshold: 0.000    Assigned: 37    Not Assigned: 89    1+, m/z: 0.000

|      | S  | R  | T  | A  | S  | L  | T  | S | A | A  | S  | I  | D  | G  | S  | R  | Ser     | Arg     | Thr     | Ala     | Ser     | Leu     | Thr     | Ser     | Ala      | Ala      | Ser      | Ile      | Asp      | G  |
|------|----|----|----|----|----|----|----|---|---|----|----|----|----|----|----|----|---------|---------|---------|---------|---------|---------|---------|---------|----------|----------|----------|----------|----------|----|
| Ion  | 1  | 2  | 3  | 4  | 5  | 6  | 7  | 8 | 9 | 10 | 11 | 12 | 13 | 14 | 15 | 16 | 1       | 2       | 3       | 4       | 5       | 6       | 7       | 8       | 9        | 10       | 11       | 12       | 13       | 14 |
| b    | S* | R  | T* | A  | S  | L  | T  | S | A | A  | S  | I  | D  | G  | S  | R  | 168.006 | 324.107 | 505.121 | 576.158 | 663.190 | 776.274 | 877.322 | 964.354 | 1035.391 | 1106.428 | 1193.460 | 1306.544 | 1421.571 | 14 |
| b-17 | S* | R  | T* | A  | S  | L  | T  | S | A | A  | S  | I  | D  | G  | S  | R  | -       | 307.080 | 488.094 | 559.131 | 646.163 | 759.247 | 860.295 | 947.327 | 1018.364 | 1089.401 | 1176.433 | 1289.517 | 1404.544 | 14 |
| b-18 | S* | R  | T* | A  | S  | L  | T  | S | A | A  | S  | I  | D  | G  | S  | R  | 149.995 | 306.096 | 487.110 | 558.147 | 645.179 | 758.263 | 859.311 | 946.343 | 1017.380 | 1088.417 | 1175.449 | 1288.533 | 1403.560 | 14 |
| b-Pi | S* | R  | T* | A  | S  | L  | T  | S | A | A  | S  | I  | D  | G  | S  | R  | 70.029  | 226.130 | 407.144 | 478.181 | 565.213 | 678.297 | 779.345 | 866.377 | 937.414  | 1008.451 | 1095.483 | 1208.567 | 1323.594 | 13 |
| y    | S* | R  | T* | A  | S  | L  | T  | S | A | A  | S  | I  | D  | G  | S  | R  | 175.119 | 262.151 | 319.172 | 434.199 | 547.283 | 634.315 | 705.353 | 776.390 | 863.422  | 964.469  | 1077.553 | 1164.586 | 1235.623 | 14 |
| y-17 | S* | R  | T* | A  | S  | L  | T  | S | A | A  | S  | I  | D  | G  | S  | R  | 158.092 | 245.124 | 302.146 | 417.173 | 530.257 | 617.289 | 688.326 | 759.363 | 846.395  | 947.443  | 1060.527 | 1147.559 | 1218.596 | 13 |
| y-18 | S* | R  | T* | A  | S  | L  | T  | S | A | A  | S  | I  | D  | G  | S  | R  | -       | 244.140 | 301.162 | 416.189 | 529.273 | 616.305 | 687.342 | 758.379 | 845.411  | 946.459  | 1059.543 | 1146.575 | 1217.612 | 13 |
| y-Pi | S* | R  | T* | A  | S  | L  | T  | S | A | A  | S  | I  | D  | G  | S  | R  | -       | 164.174 | 221.196 | 336.222 | 449.307 | 536.339 | 607.376 | 678.413 | 765.445  | 866.493  | 979.577  | 1066.609 | 1137.646 | 13 |
|      | 16 | 15 | 14 | 13 | 12 | 11 | 10 | 9 | 8 | 7  | 6  | 5  | 4  | 3  | 2  | 1  | Arg     | Ser     | Gly     | Asp     | Ile     | Ser     | Ala     | Ala     | Ser      | Thr      | Leu      | Ser      | Ala      | T  |

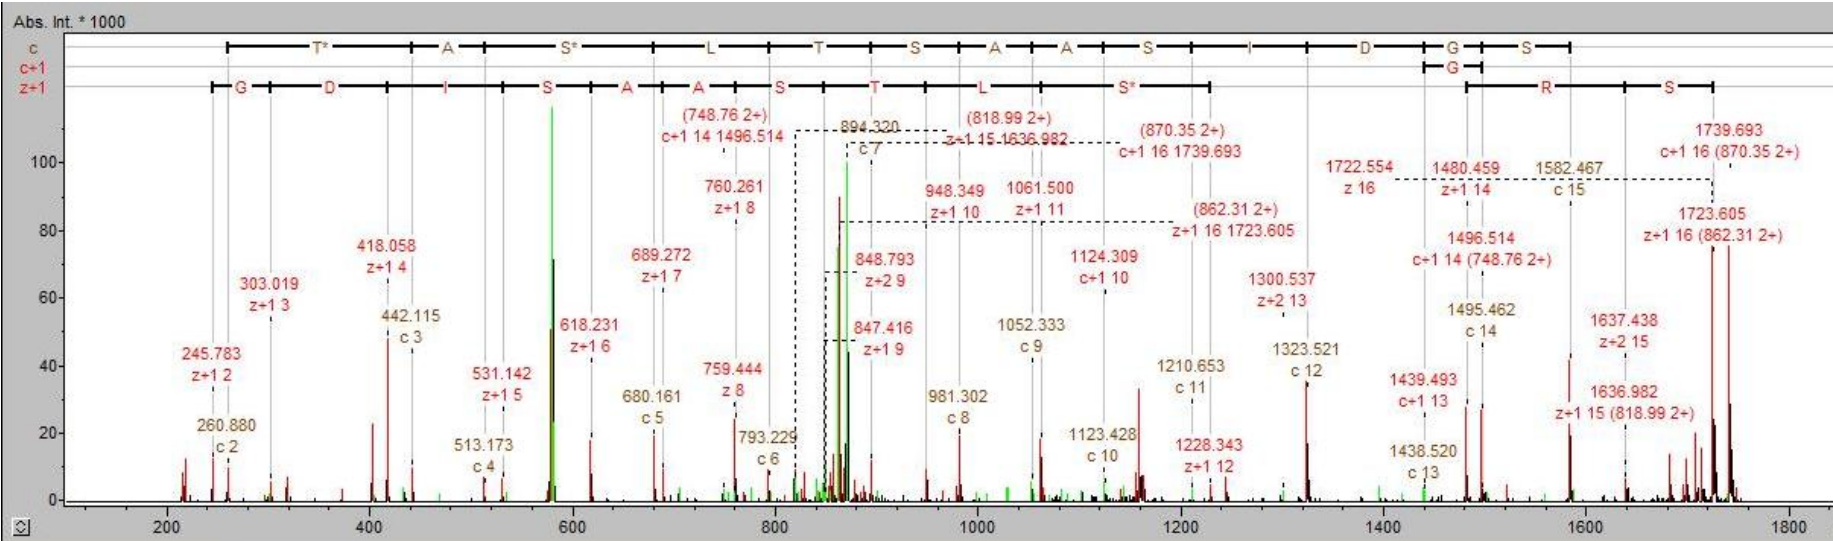

Protein View | Match Errors | MS/MS Fragments | MSMS Analysis

Sequence: SRTAASIDGSR (Peptide Mods: 3: Phospho (ST) 5: Phospho (ST))

MH+(mono): 1739.736    MH+(avg): 1740.639    MS/MS Tol: 0.500 Da    Peaks: 111    Above Threshold: 111    Zoom to m/z for 2+    Zoom +/-: 5 Da

Masses:  Monoisotopic     Average    Calculate: Masses    Threshold: 0.000    Assigned: 37    Not Assigned: 74    1+, m/z: 0.000

|     | S  | R  | T  | A  | S  | L  | T  | S | A | A  | S  | I  | D  | G  | S  | R  | Ser     | Arg     | Thr     | Ala     | Ser     | Leu     | Thr     | Ser     | Ala      | Ala      | Ser      | Ile      | Asp      | Gl  |
|-----|----|----|----|----|----|----|----|---|---|----|----|----|----|----|----|----|---------|---------|---------|---------|---------|---------|---------|---------|----------|----------|----------|----------|----------|-----|
| Ion | 1  | 2  | 3  | 4  | 5  | 6  | 7  | 8 | 9 | 10 | 11 | 12 | 13 | 14 | 15 | 16 | 1       | 2       | 3       | 4       | 5       | 6       | 7       | 8       | 9        | 10       | 11       | 12       | 13       | 14  |
| c   | S  | R  | T  | A  | S  | L  | T  | S | A | A  | S  | I  | D  | G  | S  | R  | 105.066 | 261.167 | 442.181 | 513.218 | 680.216 | 793.301 | 894.348 | 981.380 | 1052.417 | 1123.454 | 1210.486 | 1323.571 | 1438.597 | 149 |
| c+1 | S  | R  | T  | A  | S  | L  | T  | S | A | A  | S  | I  | D  | G  | S  | R  | 106.074 | 262.175 | 443.189 | 514.226 | 681.224 | 794.308 | 895.356 | 982.388 | 1053.425 | 1124.462 | 1211.494 | 1324.578 | 1439.605 | 149 |
| z   | S  | R  | T  | A  | S  | L  | T  | S | A | A  | S  | I  | D  | G  | S  | R  | 158.092 | 245.124 | 302.146 | 417.173 | 530.257 | 617.289 | 688.326 | 759.363 | 846.395  | 947.443  | 1060.527 | 1227.525 | 1298.562 | 147 |
| z+1 | S  | R  | T  | A  | S  | L  | T  | S | A | A  | S  | I  | D  | G  | S  | R  | 159.100 | 246.132 | 303.154 | 418.181 | 531.265 | 618.297 | 689.334 | 760.371 | 847.403  | 948.451  | 1061.535 | 1228.533 | 1299.570 | 148 |
| z+2 | S  | R  | T  | A  | S  | L  | T  | S | A | A  | S  | I  | D  | G  | S  | R  | 160.108 | 247.140 | 304.162 | 419.188 | 532.273 | 619.305 | 690.342 | 761.379 | 848.411  | 949.459  | 1062.543 | 1229.541 | 1300.578 | 148 |
|     | 16 | 15 | 14 | 13 | 12 | 11 | 10 | 9 | 8 | 7  | 6  | 5  | 4  | 3  | 2  | 1  | Arg     | Ser     | Gly     | Asp     | Ile     | Ser     | Ala     | Ala     | Ser      | Thr      | Leu      | Ser      | Ala      | Tr  |



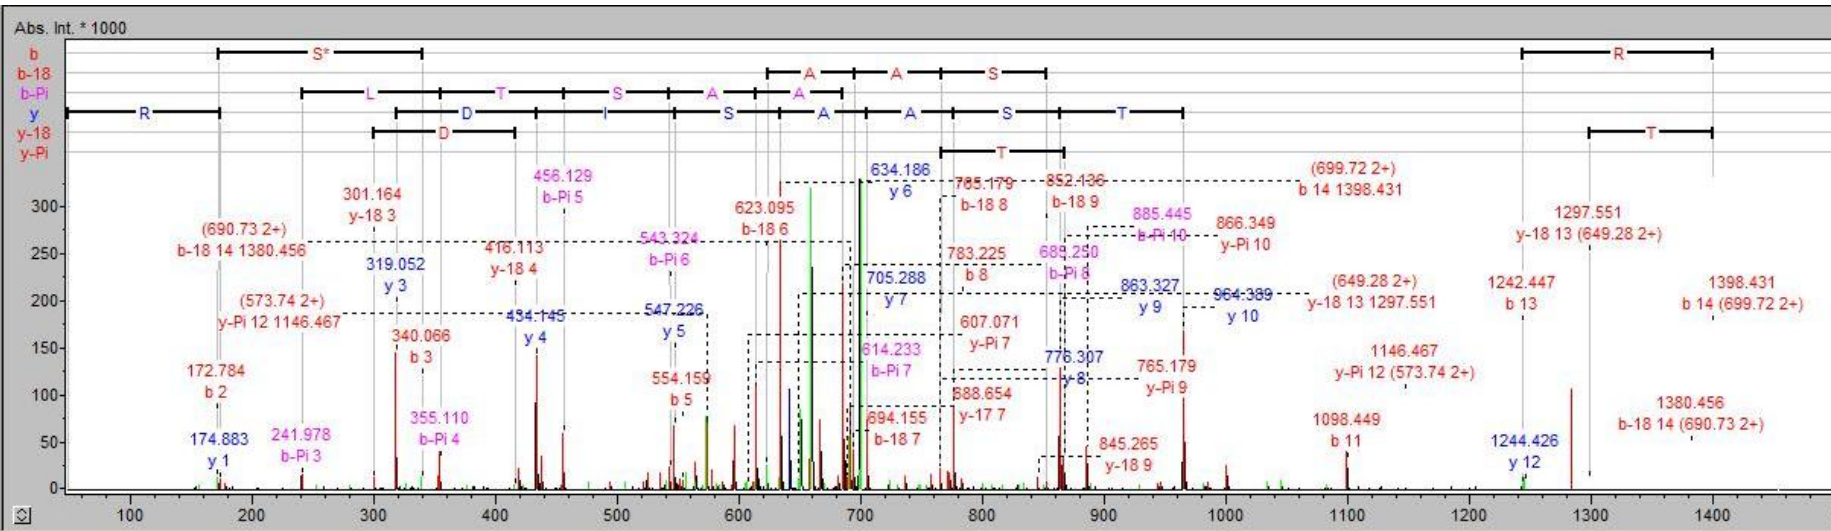

Protein View | Match Errors | MS/MS Fragments | MSMS Analysis

Sequence: TASLTSAAIDGSR (Peptide Mods: 3: Phospho (ST))

MH+(mono): 1416.637 MH+(avg): 1417.396 MS/MS To: 0.500 Da Peaks: 106 Above Threshold: 106 Zoom to m/z for 2+ Zoom +/-: 5 Da

Masses:  Monoisotopic  Average Calculate: Masses Threshold: 0.000 Assigned: 41 Not Assigned: 65 1+, m/z: 0.000

|      | T  | A  | S  | L  | T  | S | A | A | S | I  | D  | G  | S  | R  | Thr | Ala     | Ser     | Leu     | Thr     | Ser     | Ala     | Ala     | Ser     | Ile     | Asp     | Gly      | Ser      | Arg      |          |          |
|------|----|----|----|----|----|---|---|---|---|----|----|----|----|----|-----|---------|---------|---------|---------|---------|---------|---------|---------|---------|---------|----------|----------|----------|----------|----------|
| Ion  | 1  | 2  | 3  | 4  | 5  | 6 | 7 | 8 | 9 | 10 | 11 | 12 | 13 | 14 | 1   | 2       | 3       | 4       | 5       | 6       | 7       | 8       | 9       | 10      | 11      | 12       | 13       | 14       |          |          |
| b    | T  | A  | S* | L  | T  | S | A | A | S | I  | D  | G  | S  | R  |     | 102.055 | 173.092 | 340.090 | 453.174 | 554.222 | 641.254 | 712.291 | 783.328 | 870.360 | 983.445 | 1098.471 | 1155.493 | 1242.525 | 1398.626 |          |
| b-17 | T  | A  | S* | L  | T  | S | A | A | S | I  | D  | G  | S  | R  |     | -       | -       | -       | -       | -       | -       | -       | -       | -       | -       | -        | -        | -        | -        | 1381.600 |
| b-18 | T  | A  | S* | L  | T  | S | A | A | S | I  | D  | G  | S  | R  |     | 84.044  | 155.082 | 322.080 | 435.164 | 536.212 | 623.244 | 694.281 | 765.318 | 852.350 | 965.434 | 1080.461 | 1137.482 | 1224.514 | 1380.615 |          |
| b-PI | T  | A  | S* | L  | T  | S | A | A | S | I  | D  | G  | S  | R  |     | 4.078   | 75.115  | 242.114 | 355.198 | 456.245 | 543.277 | 614.314 | 685.352 | 772.384 | 885.468 | 1000.495 | 1057.516 | 1144.548 | 1300.649 |          |
| y    | T  | A  | S* | L  | T  | S | A | A | S | I  | D  | G  | S  | R  |     | 175.119 | 262.151 | 319.172 | 434.199 | 547.283 | 634.315 | 705.353 | 776.390 | 863.422 | 964.469 | 1077.553 | 1244.552 | 1315.589 | 1416.637 |          |
| y-17 | T  | A  | S* | L  | T  | S | A | A | S | I  | D  | G  | S  | R  |     | 158.092 | 245.124 | 302.146 | 417.173 | 530.257 | 617.289 | 688.326 | 759.363 | 846.395 | 947.443 | 1060.527 | 1227.525 | 1298.562 | 1399.610 |          |
| y-18 | T  | A  | S* | L  | T  | S | A | A | S | I  | D  | G  | S  | R  |     | -       | 244.140 | 301.162 | 416.189 | 529.273 | 616.305 | 687.342 | 758.379 | 845.411 | 946.459 | 1059.543 | 1226.541 | 1297.578 | 1398.626 |          |
| y-PI | T  | A  | S* | L  | T  | S | A | A | S | I  | D  | G  | S  | R  |     | -       | 164.174 | 221.196 | 336.222 | 449.307 | 536.339 | 607.376 | 678.413 | 765.445 | 866.493 | 979.577  | 1146.575 | 1217.612 | 1318.660 |          |
|      | 14 | 13 | 12 | 11 | 10 | 9 | 8 | 7 | 6 | 5  | 4  | 3  | 2  | 1  | Arg | Ser     | Gly     | Asp     | Ile     | Ser     | Ala     | Ala     | Ser     | Thr     | Leu     | Ser      | Ala      | Thr      |          |          |

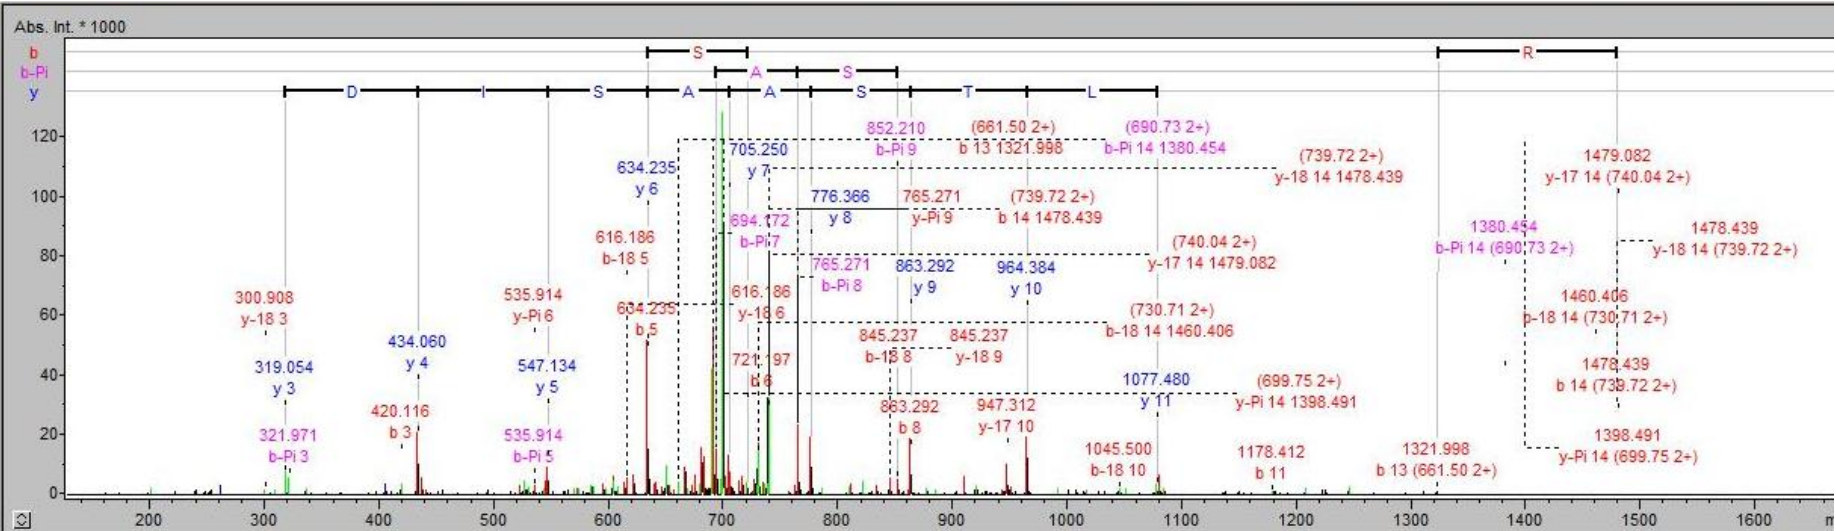

Protein View | Match Errors | MS/MS Fragments | MSMS Analysis

Sequence: T A S L T S A A S I D G S R (Peptide Mods: 1: Phospho (ST) 3: Phospho (ST))

MH+(mono): 1496.603    MH+(avg): 1497.376    MS/MS Tol: 0.500 Da    Peaks: 101    Above Threshold: 101    Zoom to m/z for 2+    Zoom +/-: 5 Da  
 Masses:  Monoisotopic     Average    Calculate: Masses    Threshold: 0.000    Assigned: 35    Not Assigned: 66    1+, m/z: 0.000

|      | T  | A  | S  | L  | T  | S | A | A | S | I  | D  | G  | S  | R  | Thr     | Ala     | Ser     | Leu     | Thr     | Ser     | Ala     | Ala     | Ser     | Ile      | Asp      | Gly      | Ser      | Arg      |
|------|----|----|----|----|----|---|---|---|---|----|----|----|----|----|---------|---------|---------|---------|---------|---------|---------|---------|---------|----------|----------|----------|----------|----------|
| Ion  | 1  | 2  | 3  | 4  | 5  | 6 | 7 | 8 | 9 | 10 | 11 | 12 | 13 | 14 | 1       | 2       | 3       | 4       | 5       | 6       | 7       | 8       | 9       | 10       | 11       | 12       | 13       | 14       |
| b    | T* | A  | S* | L  | T  | S | A | A | S | I  | D  | G  | S  | R  | 182.021 | 253.058 | 420.057 | 533.141 | 634.188 | 721.221 | 792.258 | 863.295 | 950.327 | 1063.411 | 1178.438 | 1235.459 | 1322.491 | 1478.592 |
| b-17 | T* | A  | S* | L  | T  | S | A | A | S | I  | D  | G  | S  | R  | -       | -       | -       | -       | -       | -       | -       | -       | -       | -        | -        | -        | -        | 1461.566 |
| b-18 | T* | A  | S* | L  | T  | S | A | A | S | I  | D  | G  | S  | R  | 164.011 | 235.048 | 402.046 | 515.130 | 616.178 | 703.210 | 774.247 | 845.284 | 932.316 | 1045.400 | 1160.427 | 1217.449 | 1304.481 | 1460.582 |
| b-Pi | T* | A  | S* | L  | T  | S | A | A | S | I  | D  | G  | S  | R  | 84.044  | 155.082 | 322.080 | 435.164 | 536.212 | 623.244 | 694.281 | 765.318 | 852.350 | 965.434  | 1080.461 | 1137.482 | 1224.514 | 1380.615 |
| y    | T* | A  | S* | L  | T  | S | A | A | S | I  | D  | G  | S  | R  | 175.119 | 262.151 | 319.172 | 434.199 | 547.283 | 634.315 | 705.353 | 776.390 | 863.422 | 964.469  | 1077.553 | 1244.552 | 1315.589 | 1496.603 |
| y-17 | T* | A  | S* | L  | T  | S | A | A | S | I  | D  | G  | S  | R  | 158.092 | 245.124 | 302.146 | 417.173 | 530.257 | 617.289 | 688.326 | 759.363 | 846.395 | 947.443  | 1060.527 | 1227.525 | 1298.562 | 1479.576 |
| y-18 | T* | A  | S* | L  | T  | S | A | A | S | I  | D  | G  | S  | R  | -       | 244.140 | 301.162 | 416.189 | 529.273 | 616.305 | 687.342 | 758.379 | 845.411 | 946.459  | 1059.543 | 1226.541 | 1297.578 | 1478.592 |
| y-Pi | T* | A  | S* | L  | T  | S | A | A | S | I  | D  | G  | S  | R  | -       | 164.174 | 221.196 | 336.222 | 449.307 | 536.339 | 607.376 | 678.413 | 765.445 | 866.493  | 979.577  | 1146.575 | 1217.612 | 1398.626 |
|      | 14 | 13 | 12 | 11 | 10 | 9 | 8 | 7 | 6 | 5  | 4  | 3  | 2  | 1  | Arg     | Ser     | Gly     | Asp     | Ile     | Ser     | Ala     | Ala     | Ser     | Thr      | Leu      | Ser      | Ala      | Thr      |



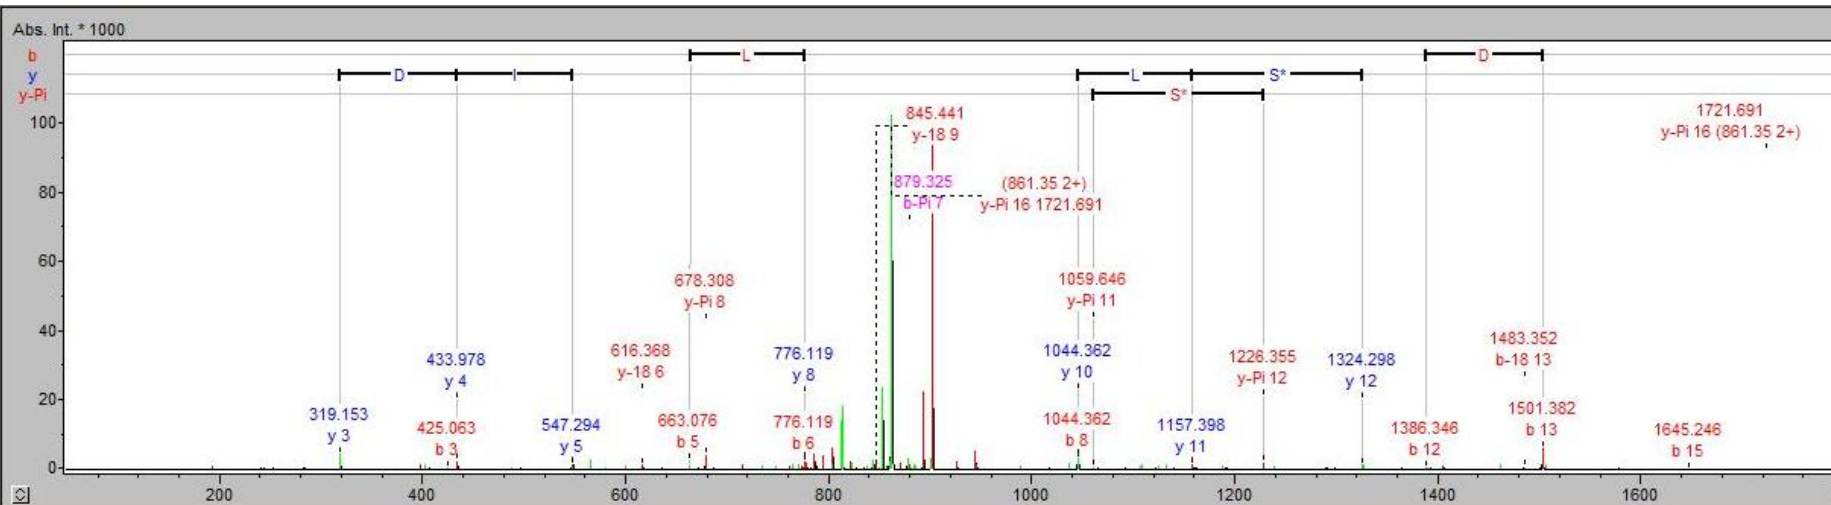

Protein View | Match Errors | MS/MS Fragments | MSMS Analysis

Sequence: **SRTASLTAASIDGSR** (Peptide Mods: 3: Phospho (ST) 5: Phospho (ST) 7: Phospho (ST) )

MH+(mono): 1819.702    MH+(avg): 1820.619    MS/MS Tol: 0.500 Da    Peaks: 78    Above Threshold: 78    Zoom to m/z for 2+    Zoom +/-: 5 Da  
 Masses:  Monoisotopic     Average    Calculate: Masses    Threshold: 0.000    Assigned: 22    Not Assigned: 56    1+, m/z: 0.000

|      | S  | R  | T  | A  | S  | L  | T  | S | A | A  | S  | I  | D  | G  | S  | R  | Ser     | Arg     | Thr     | Ala     | Ser     | Leu     | Thr     | Ser      | Ala      | Ala      | Ser      | Ile      | Asp      | C  |
|------|----|----|----|----|----|----|----|---|---|----|----|----|----|----|----|----|---------|---------|---------|---------|---------|---------|---------|----------|----------|----------|----------|----------|----------|----|
| Ion  | 1  | 2  | 3  | 4  | 5  | 6  | 7  | 8 | 9 | 10 | 11 | 12 | 13 | 14 | 15 | 16 | 1       | 2       | 3       | 4       | 5       | 6       | 7       | 8        | 9        | 10       | 11       | 12       | 13       | 14 |
| b    | S  | R  | T* | A  | S* | L  | T* | S | A | A  | S  | I  | D  | G  | S  | R  | 88.039  | 244.140 | 425.154 | 496.192 | 663.190 | 776.274 | 957.288 | 1044.320 | 1115.357 | 1186.394 | 1273.426 | 1386.510 | 1501.537 | 15 |
| b-17 | S  | R  | T* | A  | S* | L  | T* | S | A | A  | S  | I  | D  | G  | S  | R  | -       | 227.114 | 408.128 | 479.165 | 646.163 | 759.247 | 940.261 | 1027.293 | 1098.331 | 1169.368 | 1256.400 | 1369.484 | 1484.511 | 15 |
| b-18 | S  | R  | T* | A  | S* | L  | T* | S | A | A  | S  | I  | D  | G  | S  | R  | 70.029  | 226.130 | 407.144 | 478.181 | 645.179 | 758.263 | 939.277 | 1026.309 | 1097.347 | 1168.384 | 1255.416 | 1368.500 | 1483.527 | 15 |
| b-Pi | S  | R  | T* | A  | S* | L  | T* | S | A | A  | S  | I  | D  | G  | S  | R  | -       | 166.039 | 347.053 | 418.090 | 585.088 | 698.172 | 879.186 | 966.218  | 1037.255 | 1108.293 | 1195.325 | 1308.409 | 1423.436 | 14 |
| y    | S  | R  | T* | A  | S* | L  | T* | S | A | A  | S  | I  | D  | G  | S  | R  | 175.119 | 262.151 | 319.172 | 434.199 | 547.283 | 634.315 | 705.353 | 776.390  | 863.422  | 1044.436 | 1157.520 | 1324.518 | 1395.555 | 15 |
| y-17 | S  | R  | T* | A  | S* | L  | T* | S | A | A  | S  | I  | D  | G  | S  | R  | 158.092 | 245.124 | 302.146 | 417.173 | 530.257 | 617.289 | 688.326 | 759.363  | 846.395  | 1027.409 | 1140.493 | 1307.492 | 1378.529 | 15 |
| y-18 | S  | R  | T* | A  | S* | L  | T* | S | A | A  | S  | I  | D  | G  | S  | R  | -       | 244.140 | 301.162 | 416.189 | 529.273 | 616.305 | 687.342 | 758.379  | 845.411  | 1026.425 | 1139.509 | 1306.508 | 1377.545 | 15 |
| y-Pi | S  | R  | T* | A  | S* | L  | T* | S | A | A  | S  | I  | D  | G  | S  | R  | -       | 164.174 | 221.196 | 336.222 | 449.307 | 536.339 | 607.376 | 678.413  | 765.445  | 946.459  | 1059.543 | 1226.541 | 1297.578 | 14 |
|      | 16 | 15 | 14 | 13 | 12 | 11 | 10 | 9 | 8 | 7  | 6  | 5  | 4  | 3  | 2  | 1  | Arg     | Ser     | Gly     | Asp     | Ile     | Ser     | Ala     | Ala      | Ser      | Thr      | Leu      | Ser      | Ala      | T  |

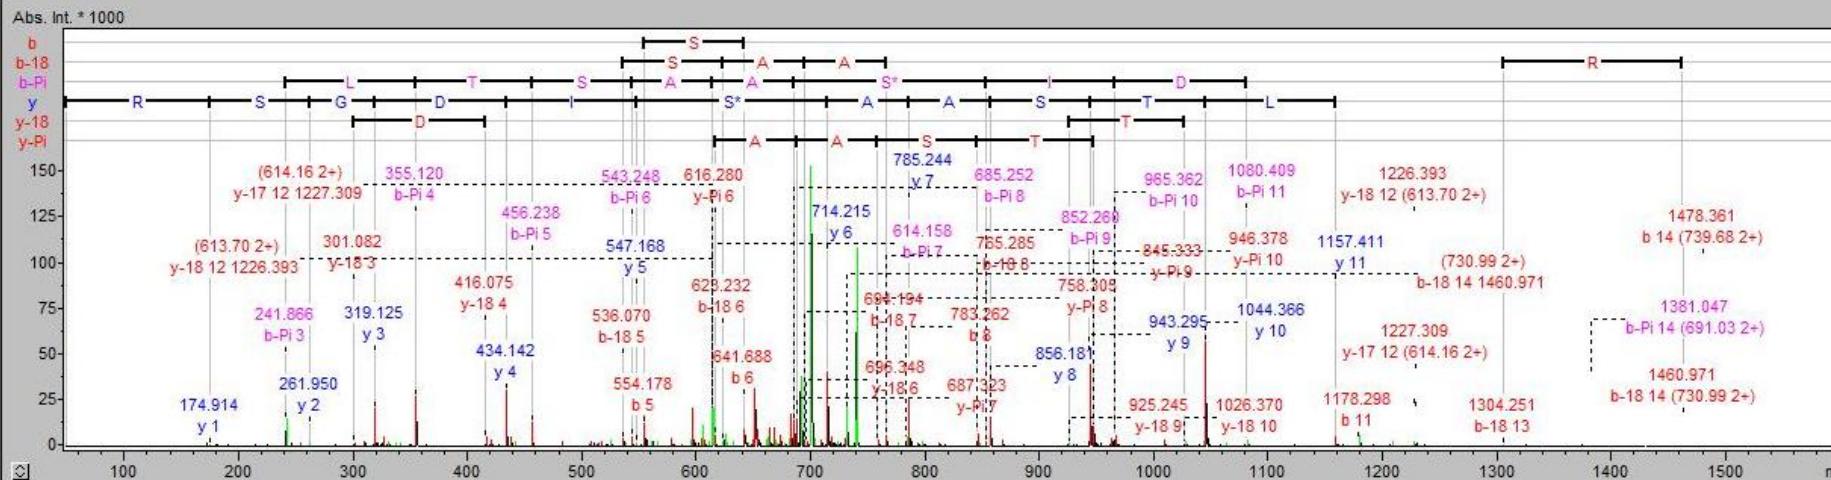

Protein View | Match Errors | MS/MS Fragments | MSMS Analysis

Sequence: **TASLTSAASIDGSR** (Peptide Mods: 1: Phospho (ST) 9: Phospho (ST))

MH+(mono): 1496.603    MH+(avg): 1497.376    MS/MS Tol: 0.500 Da    Peaks: 106    Above Threshold: 106    Zoom to m/z for 2+    Zoom +/-: 5 Da  
 Masses:  Monoisotopic     Average    Calculate: Masses    Threshold: 0.000    Assigned: 46    Not Assigned: 60    1+, m/z: 0.000

|      | T  | A  | S  | L  | T  | S | A | A | S  | I  | D  | G  | S  | R  | Thr | Ala     | Ser     | Leu     | Thr     | Ser     | Ala     | Ala     | Ser     | Ile     | Asp      | Gly      | Ser      | Arg      |          |
|------|----|----|----|----|----|---|---|---|----|----|----|----|----|----|-----|---------|---------|---------|---------|---------|---------|---------|---------|---------|----------|----------|----------|----------|----------|
| Ion  | 1  | 2  | 3  | 4  | 5  | 6 | 7 | 8 | 9  | 10 | 11 | 12 | 13 | 14 | 1   | 2       | 3       | 4       | 5       | 6       | 7       | 8       | 9       | 10      | 11       | 12       | 13       | 14       |          |
| b    | T* | A  | S  | L  | T  | S | A | A | S* | I  | D  | G  | S  | R  |     | 182.021 | 253.058 | 340.090 | 453.174 | 554.222 | 641.254 | 712.291 | 783.328 | 950.327 | 1063.411 | 1178.438 | 1235.459 | 1322.491 | 1478.592 |
| b-17 | T* | A  | S  | L  | T  | S | A | A | S* | I  | D  | G  | S  | R  |     | -       | -       | -       | -       | -       | -       | -       | -       | -       | -        | -        | -        | -        | 1461.566 |
| b-18 | T* | A  | S  | L  | T  | S | A | A | S* | I  | D  | G  | S  | R  |     | 164.011 | 235.048 | 322.080 | 435.164 | 536.212 | 623.244 | 694.281 | 765.318 | 932.316 | 1045.400 | 1160.427 | 1217.449 | 1304.481 | 1460.582 |
| b-Pi | T* | A  | S  | L  | T  | S | A | A | S* | I  | D  | G  | S  | R  |     | 84.044  | 155.082 | 242.114 | 355.198 | 456.245 | 543.277 | 614.314 | 685.352 | 852.350 | 965.434  | 1080.461 | 1137.482 | 1224.514 | 1380.615 |
| y    | T* | A  | S  | L  | T  | S | A | A | S* | I  | D  | G  | S  | R  |     | 175.119 | 262.151 | 319.172 | 434.199 | 547.283 | 714.282 | 785.319 | 856.356 | 943.388 | 1044.436 | 1157.520 | 1244.552 | 1315.589 | 1496.603 |
| y-17 | T* | A  | S  | L  | T  | S | A | A | S* | I  | D  | G  | S  | R  |     | 158.092 | 245.124 | 302.146 | 417.173 | 530.257 | 697.255 | 768.292 | 839.329 | 926.362 | 1027.409 | 1140.493 | 1227.525 | 1298.562 | 1479.576 |
| y-18 | T* | A  | S  | L  | T  | S | A | A | S* | I  | D  | G  | S  | R  |     | -       | 244.140 | 301.162 | 416.189 | 529.273 | 696.271 | 767.308 | 838.345 | 925.378 | 1026.425 | 1139.509 | 1226.541 | 1297.578 | 1478.592 |
| y-Pi | T* | A  | S  | L  | T  | S | A | A | S* | I  | D  | G  | S  | R  |     | -       | 164.174 | 221.196 | 336.222 | 449.307 | 616.305 | 687.342 | 758.379 | 845.411 | 946.459  | 1059.543 | 1146.575 | 1217.612 | 1398.626 |
|      | 14 | 13 | 12 | 11 | 10 | 9 | 8 | 7 | 6  | 5  | 4  | 3  | 2  | 1  | Arg | Ser     | Gly     | Asp     | Ile     | Ser     | Ala     | Ala     | Ser     | Thr     | Leu      | Ser      | Ala      | Thr      |          |



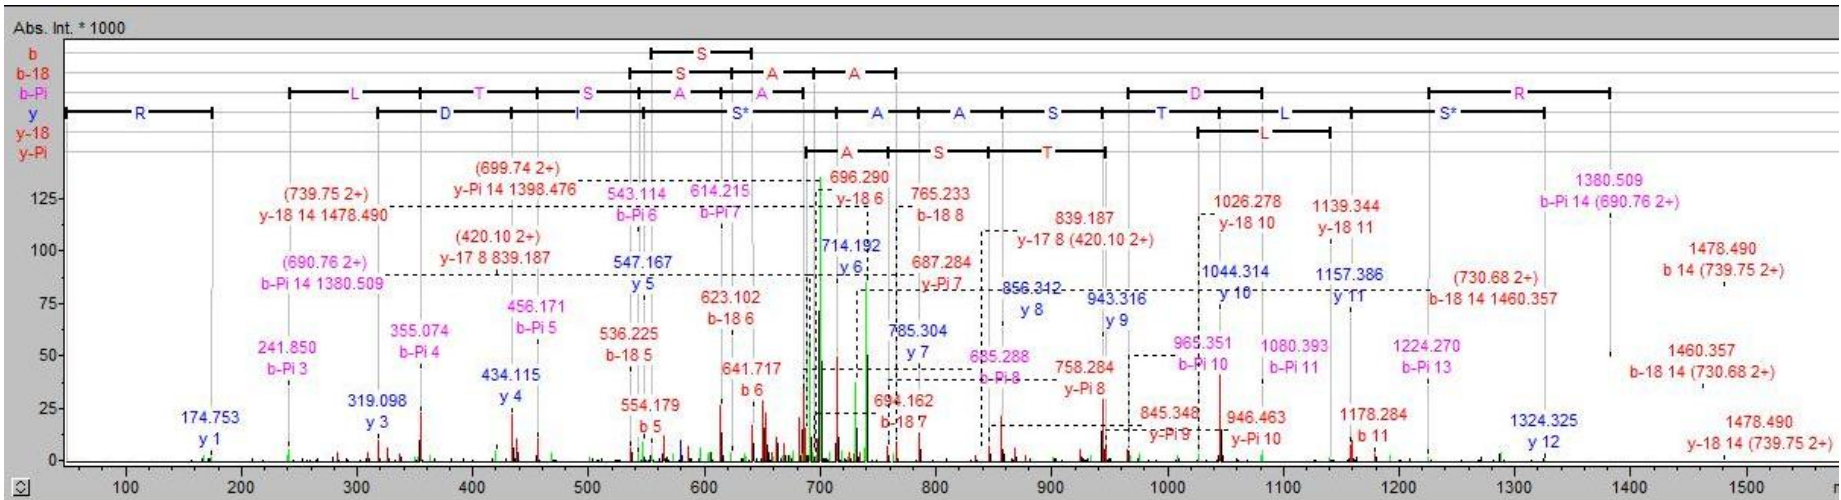

Protein View | Match Errors | MS/MS Fragments | MSMS Analysis

Sequence: **TASLTSAA SIDGSR** (Peptide Mods: 3: Phospho (ST) 9: Phospho (ST) )

MH+(mono): 1496.603    MH+(avg): 1497.376    MS/MS Tol: 0.500 Da    Peaks: 94    Above Threshold: 94    Zoom to m/z for 2+    Zoom +/-: 5 Da  
 Masses:  Monoisotopic     Average    Calculate: Masses    Threshold: 0.000    Assigned: 40    Not Assigned: 54    1+, m/z: 0.000

|      | T  | A  | S  | L  | T  | S | A | A | S  | I  | D  | G  | S  | R  | Thr     | Ala     | Ser     | Leu     | Thr     | Ser     | Ala     | Ala     | Ser     | Ile      | Asp      | Gly      | Ser      | Arg      |
|------|----|----|----|----|----|---|---|---|----|----|----|----|----|----|---------|---------|---------|---------|---------|---------|---------|---------|---------|----------|----------|----------|----------|----------|
| Ion  | 1  | 2  | 3  | 4  | 5  | 6 | 7 | 8 | 9  | 10 | 11 | 12 | 13 | 14 | 1       | 2       | 3       | 4       | 5       | 6       | 7       | 8       | 9       | 10       | 11       | 12       | 13       | 14       |
| b    | T  | A  | S* | L  | T  | S | A | A | S* | I  | D  | G  | S  | R  | 102.055 | 173.092 | 340.090 | 453.174 | 554.222 | 641.254 | 712.291 | 783.328 | 950.327 | 1063.411 | 1178.438 | 1235.459 | 1322.491 | 1478.592 |
| b-17 | T  | A  | S* | L  | T  | S | A | A | S* | I  | D  | G  | S  | R  | -       | -       | -       | -       | -       | -       | -       | -       | -       | -        | -        | -        | -        | 1461.566 |
| b-18 | T  | A  | S* | L  | T  | S | A | A | S* | I  | D  | G  | S  | R  | 84.044  | 155.082 | 322.080 | 435.164 | 536.212 | 623.244 | 694.281 | 765.318 | 932.316 | 1045.400 | 1160.427 | 1217.449 | 1304.481 | 1460.582 |
| b-Pi | T  | A  | S* | L  | T  | S | A | A | S* | I  | D  | G  | S  | R  | 4.078   | 75.115  | 242.114 | 355.198 | 456.245 | 543.277 | 614.314 | 685.352 | 852.350 | 965.434  | 1080.461 | 1137.482 | 1224.514 | 1380.615 |
| y    | T  | A  | S* | L  | T  | S | A | A | S* | I  | D  | G  | S  | R  | 175.119 | 262.151 | 319.172 | 434.199 | 547.283 | 714.282 | 785.319 | 856.356 | 943.388 | 1044.436 | 1157.520 | 1324.518 | 1395.555 | 1496.603 |
| y-17 | T  | A  | S* | L  | T  | S | A | A | S* | I  | D  | G  | S  | R  | 158.092 | 245.124 | 302.146 | 417.173 | 530.257 | 697.255 | 768.292 | 839.329 | 926.362 | 1027.409 | 1140.493 | 1307.492 | 1378.529 | 1479.576 |
| y-18 | T  | A  | S* | L  | T  | S | A | A | S* | I  | D  | G  | S  | R  | -       | 244.140 | 301.162 | 416.189 | 529.273 | 696.271 | 767.308 | 838.345 | 925.378 | 1026.425 | 1139.509 | 1306.508 | 1377.545 | 1478.592 |
| y-Pi | T  | A  | S* | L  | T  | S | A | A | S* | I  | D  | G  | S  | R  | -       | 164.174 | 221.196 | 336.222 | 449.307 | 616.305 | 687.342 | 758.379 | 845.411 | 946.459  | 1059.543 | 1226.541 | 1297.578 | 1398.626 |
|      | 14 | 13 | 12 | 11 | 10 | 9 | 8 | 7 | 6  | 5  | 4  | 3  | 2  | 1  | Arg     | Ser     | Gly     | Asp     | Ile     | Ser     | Ala     | Ala     | Ser     | Thr      | Leu      | Ser      | Ala      | Thr      |

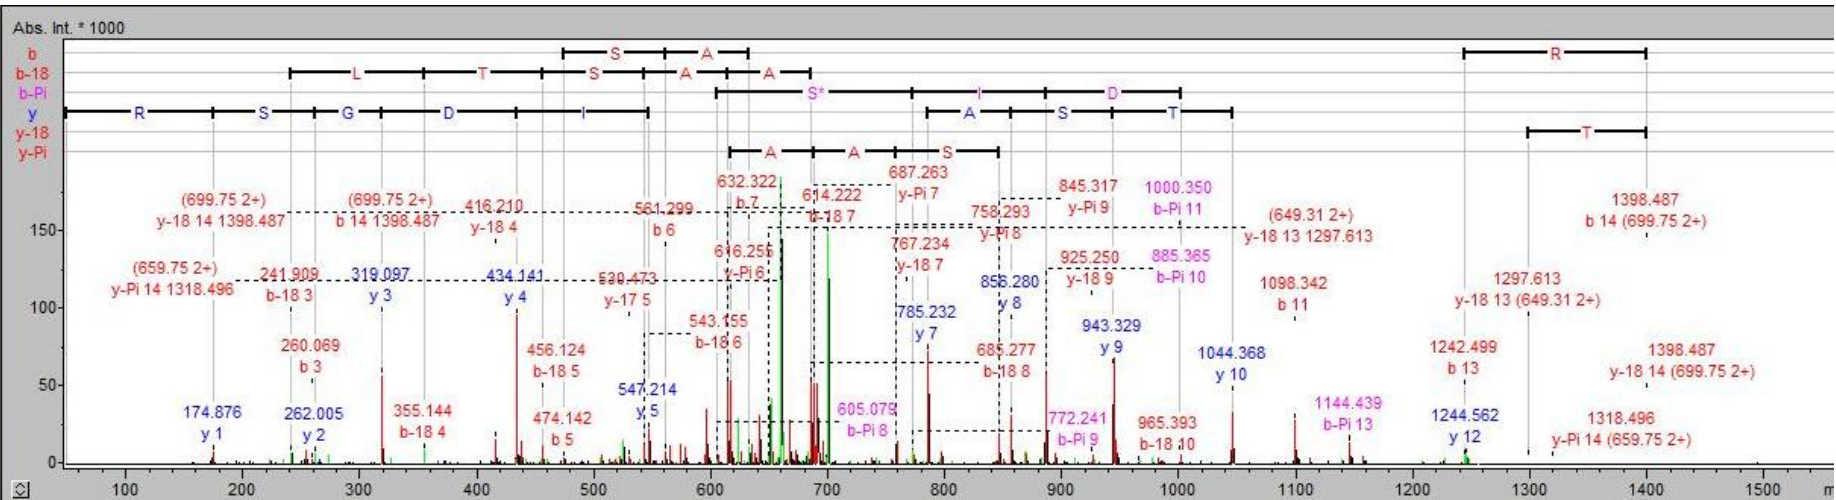

Protein View | Match Errors | MS/MS Fragments | MSMS Analysis

Sequence: T A S L T S A A S I D G S R (Peptide Mods: 9: Phospho (ST))

MH+(mono): 1416.637    MH+(avg): 1417.396    MS/MS Tol: 0.500 Da    Peaks: 118    Above Threshold: 118    Zoom to m/z for 2+    Zoom +/-: 5 Da

Masses:  Monoisotopic     Average    Calculate: Masses    Threshold: 0.000    Assigned: 40    Not Assigned: 78    1+, m/z: 0.000

|      | T  | A  | S  | L  | T  | S | A | A | S  | I  | D  | G  | S  | R  | Thr     | Ala     | Ser     | Leu     | Thr     | Ser     | Ala     | Ala     | Ser     | Ile      | Asp      | Gly      | Ser      | Arg      |
|------|----|----|----|----|----|---|---|---|----|----|----|----|----|----|---------|---------|---------|---------|---------|---------|---------|---------|---------|----------|----------|----------|----------|----------|
| Ion  | 1  | 2  | 3  | 4  | 5  | 6 | 7 | 8 | 9  | 10 | 11 | 12 | 13 | 14 | 1       | 2       | 3       | 4       | 5       | 6       | 7       | 8       | 9       | 10       | 11       | 12       | 13       | 14       |
| b    | T  | A  | S  | L  | T  | S | A | A | S* | I  | D  | G  | S  | R  | 102.055 | 173.092 | 260.124 | 373.208 | 474.256 | 561.288 | 632.325 | 703.362 | 870.360 | 983.445  | 1098.471 | 1155.493 | 1242.525 | 1398.626 |
| b-17 | T  | A  | S  | L  | T  | S | A | A | S* | I  | D  | G  | S  | R  | -       | -       | -       | -       | -       | -       | -       | -       | -       | -        | -        | -        | -        | 1381.600 |
| b-18 | T  | A  | S  | L  | T  | S | A | A | S* | I  | D  | G  | S  | R  | 84.044  | 155.082 | 242.114 | 355.198 | 456.245 | 543.277 | 614.314 | 685.352 | 852.350 | 965.434  | 1080.461 | 1137.482 | 1224.514 | 1380.615 |
| b-PI | T  | A  | S  | L  | T  | S | A | A | S* | I  | D  | G  | S  | R  | 4.078   | 75.115  | 162.147 | 275.231 | 376.279 | 463.311 | 534.348 | 605.385 | 772.384 | 885.468  | 1000.495 | 1057.516 | 1144.548 | 1300.649 |
| y    | T  | A  | S  | L  | T  | S | A | A | S* | I  | D  | G  | S  | R  | 175.119 | 262.151 | 319.172 | 434.199 | 547.283 | 714.282 | 785.319 | 856.356 | 943.388 | 1044.436 | 1157.520 | 1244.552 | 1315.589 | 1416.637 |
| y-17 | T  | A  | S  | L  | T  | S | A | A | S* | I  | D  | G  | S  | R  | 158.092 | 245.124 | 302.146 | 417.173 | 530.257 | 697.255 | 768.292 | 839.329 | 926.362 | 1027.409 | 1140.493 | 1227.525 | 1298.562 | 1399.610 |
| y-18 | T  | A  | S  | L  | T  | S | A | A | S* | I  | D  | G  | S  | R  | -       | 244.140 | 301.162 | 416.189 | 529.273 | 696.271 | 767.308 | 838.345 | 925.378 | 1026.425 | 1139.509 | 1226.541 | 1297.578 | 1398.626 |
| y-PI | T  | A  | S  | L  | T  | S | A | A | S* | I  | D  | G  | S  | R  | -       | 164.174 | 221.196 | 336.222 | 449.307 | 616.305 | 687.342 | 758.379 | 845.411 | 946.459  | 1059.543 | 1146.575 | 1217.612 | 1318.660 |
|      | 14 | 13 | 12 | 11 | 10 | 9 | 8 | 7 | 6  | 5  | 4  | 3  | 2  | 1  | Arg     | Ser     | Gly     | Asp     | Ile     | Ser     | Ala     | Ala     | Ser     | Thr      | Leu      | Ser      | Ala      | Thr      |



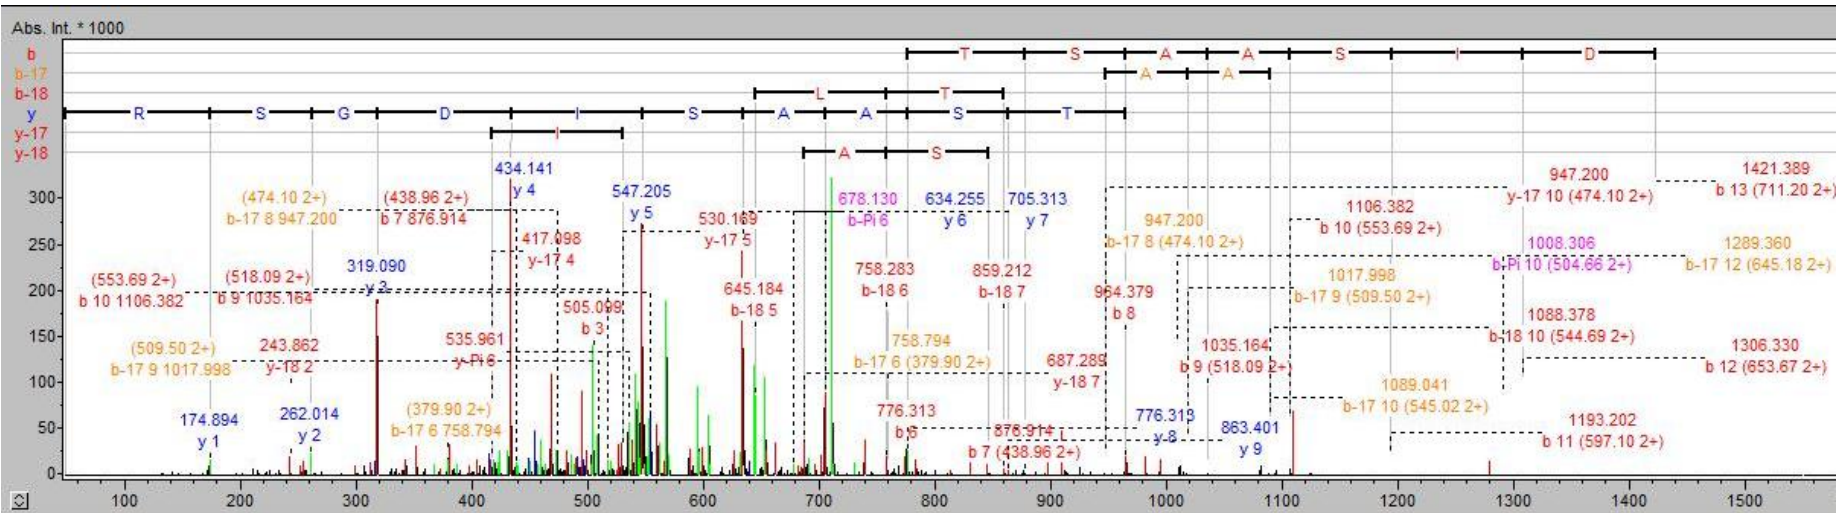

Protein View | Match Errors | MS/MS Fragments | MSMS Analysis

Sequence: **SRTASLTSAASIDGSR** (Peptide Mods: 1: Phospho (ST) 3: Phospho (ST))

MH+(mono): 1739.736    MH+(avg): 1740.639    MS/MS To: 0.500 Da    Peaks: 107    Above Threshold: 107    Zoom to m/z for 2+    Zoom +/-: 5 Da  
 Masses:  Monoisotopic  Average    Calculate: Masses    Threshold: 0.000    Assigned: 42    Not Assigned: 65    1+, m/z: 0.000

|      | S  | R  | T  | A  | S  | L  | T  | S | A | A  | S  | I  | D  | G  | S  | R  | Ser     | Arg     | Thr     | Ala     | Ser     | Leu     | Thr     | Ser     | Ala      | Ala      | Ser      | Ile      | Asp      | C  |
|------|----|----|----|----|----|----|----|---|---|----|----|----|----|----|----|----|---------|---------|---------|---------|---------|---------|---------|---------|----------|----------|----------|----------|----------|----|
| Ion  | 1  | 2  | 3  | 4  | 5  | 6  | 7  | 8 | 9 | 10 | 11 | 12 | 13 | 14 | 15 | 16 | 1       | 2       | 3       | 4       | 5       | 6       | 7       | 8       | 9        | 10       | 11       | 12       | 13       | 14 |
| b    | S* | R* | T* | A  | S  | L  | T  | S | A | A  | S  | I  | D  | G  | S  | R  | 168.006 | 324.107 | 505.121 | 576.158 | 663.190 | 776.274 | 877.322 | 964.354 | 1035.391 | 1106.428 | 1193.460 | 1306.544 | 1421.571 | 14 |
| b-17 | S* | R* | T* | A  | S  | L  | T  | S | A | A  | S  | I  | D  | G  | S  | R  | -       | 307.080 | 488.094 | 559.131 | 646.163 | 759.247 | 860.295 | 947.327 | 1018.364 | 1089.401 | 1176.433 | 1289.517 | 1404.544 | 14 |
| b-18 | S* | R* | T* | A  | S  | L  | T  | S | A | A  | S  | I  | D  | G  | S  | R  | 149.995 | 306.096 | 487.110 | 558.147 | 645.179 | 758.263 | 859.311 | 946.343 | 1017.380 | 1088.417 | 1175.449 | 1288.533 | 1403.560 | 14 |
| b-Pi | S* | R* | T* | A  | S  | L  | T  | S | A | A  | S  | I  | D  | G  | S  | R  | 70.029  | 226.130 | 407.144 | 478.181 | 565.213 | 678.297 | 779.345 | 866.377 | 937.414  | 1008.451 | 1095.483 | 1208.567 | 1323.594 | 13 |
| y    | S* | R* | T* | A  | S  | L  | T  | S | A | A  | S  | I  | D  | G  | S  | R  | 175.119 | 262.151 | 319.172 | 434.199 | 547.283 | 634.315 | 705.353 | 776.390 | 863.422  | 964.469  | 1077.553 | 1164.586 | 1235.623 | 14 |
| y-17 | S* | R* | T* | A  | S  | L  | T  | S | A | A  | S  | I  | D  | G  | S  | R  | 158.092 | 245.124 | 302.146 | 417.173 | 530.257 | 617.289 | 688.326 | 759.363 | 846.395  | 947.443  | 1060.527 | 1147.559 | 1218.596 | 13 |
| y-18 | S* | R* | T* | A  | S  | L  | T  | S | A | A  | S  | I  | D  | G  | S  | R  | -       | 244.140 | 301.162 | 416.189 | 529.273 | 616.305 | 687.342 | 758.379 | 845.411  | 946.459  | 1059.543 | 1146.575 | 1217.612 | 13 |
| y-Pi | S* | R* | T* | A  | S  | L  | T  | S | A | A  | S  | I  | D  | G  | S  | R  | -       | 164.174 | 221.196 | 336.222 | 449.307 | 536.339 | 607.376 | 678.413 | 765.445  | 866.493  | 979.577  | 1066.609 | 1137.646 | 13 |
|      | 16 | 15 | 14 | 13 | 12 | 11 | 10 | 9 | 8 | 7  | 6  | 5  | 4  | 3  | 2  | 1  | Arg     | Ser     | Gly     | Asp     | Ile     | Ser     | Ala     | Ala     | Ser      | Thr      | Leu      | Ser      | Ala      | 1  |

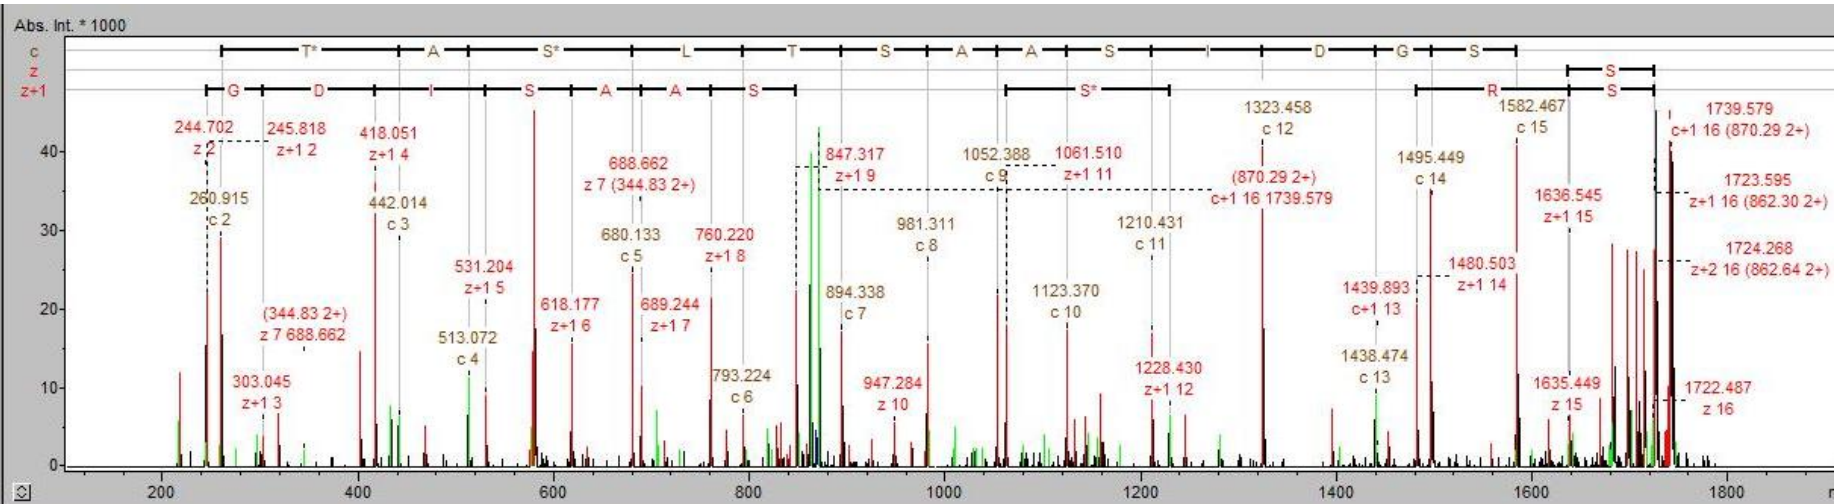

Protein View | Match Errors | MS/MS Fragments | MSMS Analysis

Sequence: SRTASLTAASIDGSR (Peptide Mods: 3: Phospho (ST) 5: Phospho (ST))

MH+(mono): 1739.736    MH+(avg): 1740.639    MS/MS To: 0.500 Da    Peaks: 111    Above Threshold: 111    Zoom to m/z for 2+    Zoom +/-: 5 Da

Masses:  Monoisotopic     Average    Calculate: Masses    Threshold: 0.000    Assigned: 35    Not Assigned: 76    1+, m/z: 0.000

|     | S  | R  | T  | A  | S  | L  | T  | S | A | A  | S  | I  | D  | G  | S  | R  | Ser     | Arg     | Thr     | Ala     | Ser     | Leu     | Thr     | Ser     | Ala      | Ala      | Ser      | Ile      | Asp      | Gl  |
|-----|----|----|----|----|----|----|----|---|---|----|----|----|----|----|----|----|---------|---------|---------|---------|---------|---------|---------|---------|----------|----------|----------|----------|----------|-----|
| Ion | 1  | 2  | 3  | 4  | 5  | 6  | 7  | 8 | 9 | 10 | 11 | 12 | 13 | 14 | 15 | 16 | 1       | 2       | 3       | 4       | 5       | 6       | 7       | 8       | 9        | 10       | 11       | 12       | 13       | 14  |
| c   | S  | R  | T* | A  | S* | L  | T  | S | A | A  | S  | I  | D  | G  | S  | R  | 105.066 | 261.167 | 442.181 | 513.218 | 680.216 | 793.301 | 894.348 | 981.380 | 1052.417 | 1123.454 | 1210.486 | 1323.571 | 1438.597 | 149 |
| c+1 | S  | R  | T* | A  | S* | L  | T  | S | A | A  | S  | I  | D  | G  | S  | R  | 106.074 | 262.175 | 443.189 | 514.226 | 681.224 | 794.308 | 895.356 | 982.388 | 1053.425 | 1124.462 | 1211.494 | 1324.578 | 1439.605 | 149 |
| z   | S  | R  | T* | A  | S* | L  | T  | S | A | A  | S  | I  | D  | G  | S  | R  | 158.092 | 245.124 | 302.146 | 417.173 | 530.257 | 617.289 | 688.326 | 759.363 | 846.395  | 947.443  | 1060.527 | 1227.525 | 1298.562 | 147 |
| z+1 | S  | R  | T* | A  | S* | L  | T  | S | A | A  | S  | I  | D  | G  | S  | R  | 159.100 | 246.132 | 303.154 | 418.181 | 531.265 | 618.297 | 689.334 | 760.371 | 847.403  | 948.451  | 1061.535 | 1228.533 | 1299.570 | 148 |
| z+2 | S  | R  | T* | A  | S* | L  | T  | S | A | A  | S  | I  | D  | G  | S  | R  | 160.108 | 247.140 | 304.162 | 419.188 | 532.273 | 619.305 | 690.342 | 761.379 | 848.411  | 949.459  | 1062.543 | 1229.541 | 1300.578 | 148 |
|     | 16 | 15 | 14 | 13 | 12 | 11 | 10 | 9 | 8 | 7  | 6  | 5  | 4  | 3  | 2  | 1  | Arg     | Ser     | Gly     | Asp     | Ile     | Ser     | Ala     | Ala     | Ser      | Thr      | Leu      | Ser      | Ala      | Tr  |





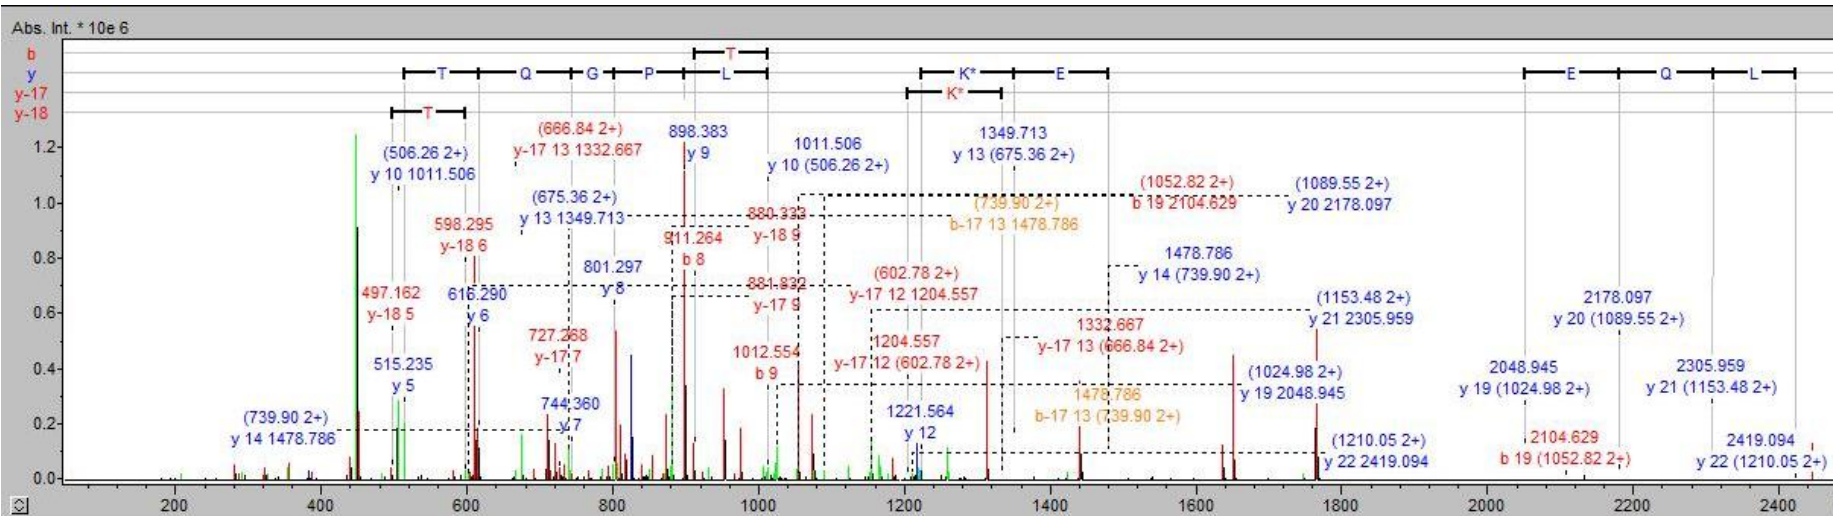

Protein View | Match Errors | MS/MS Fragments | MSMS Analysis

Sequence: 
 MH+(mono):  MH+(avg):  MS/MS Tol:  Da Peaks:  Above Threshold:  Zoom to m/z for 2+  Da
   
 Masses:  Monoisotopic  Average Calculate:  Threshold:  Assigned:  Not Assigned:  1+, m/z: 0.000

|      | A  | E  | L  | Q  | E  | V  | Q  | I  | T  | E  | E  | K              | P  | L  | L  | P  | G  | L  | P  | Q  | T  | P  | E  | A  | A       | K       | Ala     | Glu     | Leu     | Gln     | Glu     | Val     | Gln      | Ile      | Thr      | Glu      | Glu |
|------|----|----|----|----|----|----|----|----|----|----|----|----------------|----|----|----|----|----|----|----|----|----|----|----|----|---------|---------|---------|---------|---------|---------|---------|---------|----------|----------|----------|----------|-----|
| Ion  | 1  | 2  | 3  | 4  | 5  | 6  | 7  | 8  | 9  | 10 | 11 | 12             | 13 | 14 | 15 | 16 | 17 | 18 | 19 | 20 | 21 | 22 | 23 | 24 | 1       | 2       | 3       | 4       | 5       | 6       | 7       | 8       | 9        | 10       | 11       | 12       |     |
| b    | A  | E  | L  | Q  | E  | V  | Q  | I  | T  | E  | E  | K <sup>2</sup> | P  | L  | L  | P  | G  | Q  | T  | P  | E  | A  | A  | K  | 72.044  | 201.087 | 314.171 | 442.230 | 571.272 | 670.341 | 798.399 | 911.483 | 1012.531 | 1141.574 | 1270.616 | 1399.664 |     |
| b-17 | A  | E  | L  | Q  | E  | V  | Q  | I  | T  | E  | E  | K <sup>2</sup> | P  | L  | L  | P  | G  | Q  | T  | P  | E  | A  | A  | K  | -       | -       | -       | 425.203 | 554.246 | 653.314 | 781.373 | 894.457 | 995.504  | 1124.547 | 1253.590 | 1382.637 |     |
| b-18 | A  | E  | L  | Q  | E  | V  | Q  | I  | T  | E  | E  | K <sup>2</sup> | P  | L  | L  | P  | G  | Q  | T  | P  | E  | A  | A  | K  | -       | 183.076 | 296.160 | 424.219 | 553.262 | 652.330 | 780.389 | 893.473 | 994.520  | 1123.563 | 1252.606 | 1381.649 |     |
| y    | A  | E  | L  | Q  | E  | V  | Q  | I  | T  | E  | E  | K <sup>2</sup> | P  | L  | L  | P  | G  | Q  | T  | P  | E  | A  | A  | K  | 147.113 | 218.150 | 289.187 | 418.230 | 515.282 | 616.330 | 744.389 | 801.410 | 898.463  | 1011.547 | 1124.631 | 1237.674 |     |
| y-17 | A  | E  | L  | Q  | E  | V  | Q  | I  | T  | E  | E  | K <sup>2</sup> | P  | L  | L  | P  | G  | Q  | T  | P  | E  | A  | A  | K  | 130.086 | 201.123 | 272.160 | 401.203 | 498.256 | 599.304 | 727.362 | 784.384 | 881.436  | 994.520  | 1107.604 | 1220.647 |     |
| y-18 | A  | E  | L  | Q  | E  | V  | Q  | I  | T  | E  | E  | K <sup>2</sup> | P  | L  | L  | P  | G  | Q  | T  | P  | E  | A  | A  | K  | -       | -       | -       | 400.219 | 497.272 | 598.320 | 726.378 | 783.400 | 880.452  | 993.536  | 1106.620 | 1219.663 |     |
|      | 24 | 23 | 22 | 21 | 20 | 19 | 18 | 17 | 16 | 15 | 14 | 13             | 12 | 11 | 10 | 9  | 8  | 7  | 6  | 5  | 4  | 3  | 2  | 1  | Lys     | Ala     | Ala     | Glu     | Pro     | Thr     | Gln     | Gly     | Pro      | Leu      | Leu      |          |     |



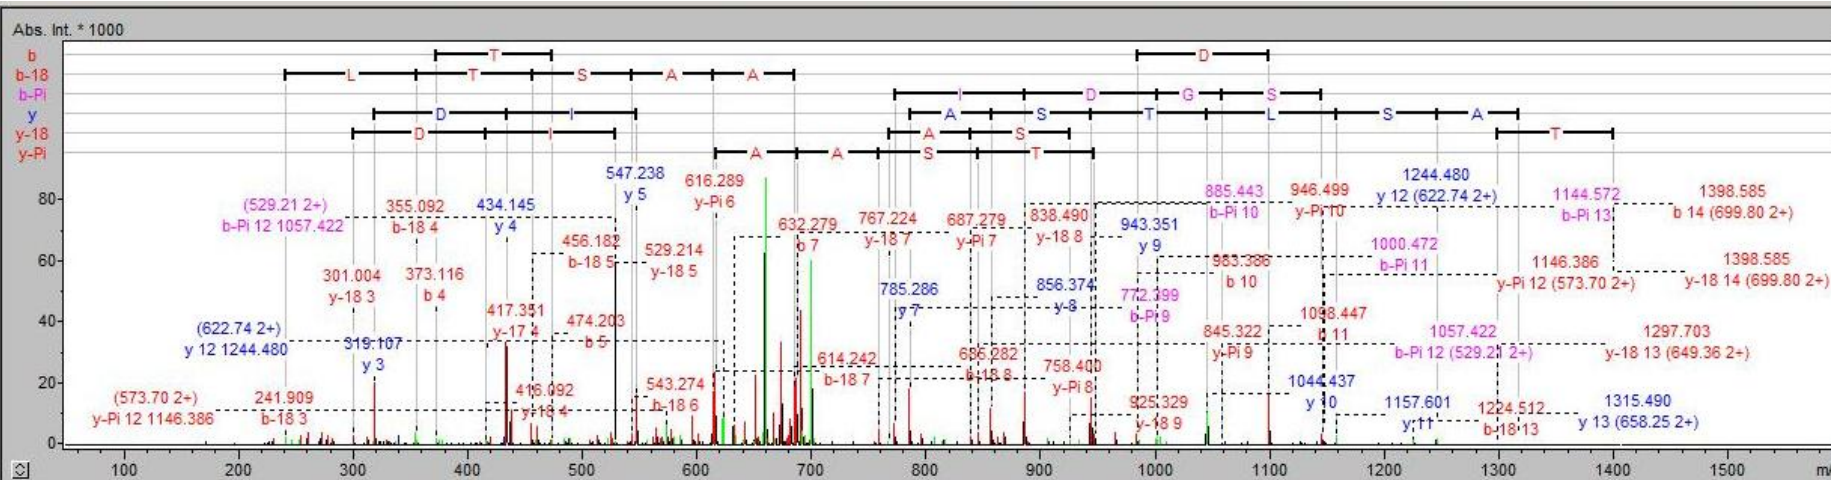

Protein View | Match Errors | MS/MS Fragments | MSMS Analysis

Sequence: TASLTSAASIDGSR (Peptide Mods: 9: Phospho (ST))

MH+(mono): 1416.637    MH+(avg): 1417.396    MS/MS Tol: 0.500 Da    Peaks: 119    Above Threshold: 119    Zoom to m/z for 2+    Zoom +/-: 5 Da

Masses:  Monoisotopic     Average    Calculate: Masses    Threshold: 0.000    Assigned: 44    Not Assigned: 75    1+, m/z: 0.000

|      | T  | A  | S  | L  | T  | S | A | A | S  | I  | D  | G  | S  | R  | Thr     | Ala     | Ser     | Leu     | Thr     | Ser     | Ala     | Ala     | Ser     | Ile      | Asp      | Gly      | Ser      | Arg      |
|------|----|----|----|----|----|---|---|---|----|----|----|----|----|----|---------|---------|---------|---------|---------|---------|---------|---------|---------|----------|----------|----------|----------|----------|
| Ion  | 1  | 2  | 3  | 4  | 5  | 6 | 7 | 8 | 9  | 10 | 11 | 12 | 13 | 14 | 1       | 2       | 3       | 4       | 5       | 6       | 7       | 8       | 9       | 10       | 11       | 12       | 13       | 14       |
| b    | T  | A  | S  | L  | T  | S | A | A | S* | I  | D  | G  | S  | R  | 102.055 | 173.092 | 260.124 | 373.208 | 474.256 | 561.288 | 632.325 | 703.362 | 870.360 | 983.445  | 1098.471 | 1155.493 | 1242.525 | 1398.626 |
| b-17 | T  | A  | S  | L  | T  | S | A | A | S* | I  | D  | G  | S  | R  | -       | -       | -       | -       | -       | -       | -       | -       | -       | -        | -        | -        | -        | 1381.600 |
| b-18 | T  | A  | S  | L  | T  | S | A | A | S* | I  | D  | G  | S  | R  | 84.044  | 155.082 | 242.114 | 355.198 | 456.245 | 543.277 | 614.314 | 685.352 | 852.350 | 965.434  | 1080.461 | 1137.482 | 1224.514 | 1380.615 |
| b-Pi | T  | A  | S  | L  | T  | S | A | A | S* | I  | D  | G  | S  | R  | 4.078   | 75.115  | 162.147 | 275.231 | 376.279 | 463.311 | 534.348 | 605.385 | 772.384 | 885.468  | 1000.495 | 1057.516 | 1144.548 | 1300.649 |
| y    | T  | A  | S  | L  | T  | S | A | A | S* | I  | D  | G  | S  | R  | 175.119 | 262.151 | 319.172 | 434.199 | 547.283 | 714.282 | 785.319 | 856.356 | 943.388 | 1044.436 | 1157.520 | 1244.552 | 1315.589 | 1416.637 |
| y-17 | T  | A  | S  | L  | T  | S | A | A | S* | I  | D  | G  | S  | R  | 158.092 | 245.124 | 302.146 | 417.173 | 530.257 | 697.255 | 768.292 | 839.329 | 926.362 | 1027.409 | 1140.493 | 1227.525 | 1298.562 | 1399.610 |
| y-18 | T  | A  | S  | L  | T  | S | A | A | S* | I  | D  | G  | S  | R  | -       | 244.140 | 301.162 | 416.189 | 529.273 | 696.271 | 767.308 | 838.345 | 925.378 | 1026.425 | 1139.509 | 1226.541 | 1297.578 | 1398.626 |
| y-Pi | T  | A  | S  | L  | T  | S | A | A | S* | I  | D  | G  | S  | R  | -       | 164.174 | 221.196 | 336.222 | 449.307 | 616.305 | 687.342 | 758.379 | 845.411 | 946.459  | 1059.543 | 1146.575 | 1217.612 | 1318.660 |
|      | 14 | 13 | 12 | 11 | 10 | 9 | 8 | 7 | 6  | 5  | 4  | 3  | 2  | 1  | Arg     | Ser     | Gly     | Asp     | Ile     | Ser     | Ala     | Ala     | Ser     | Thr      | Leu      | Ser      | Ala      | Thr      |

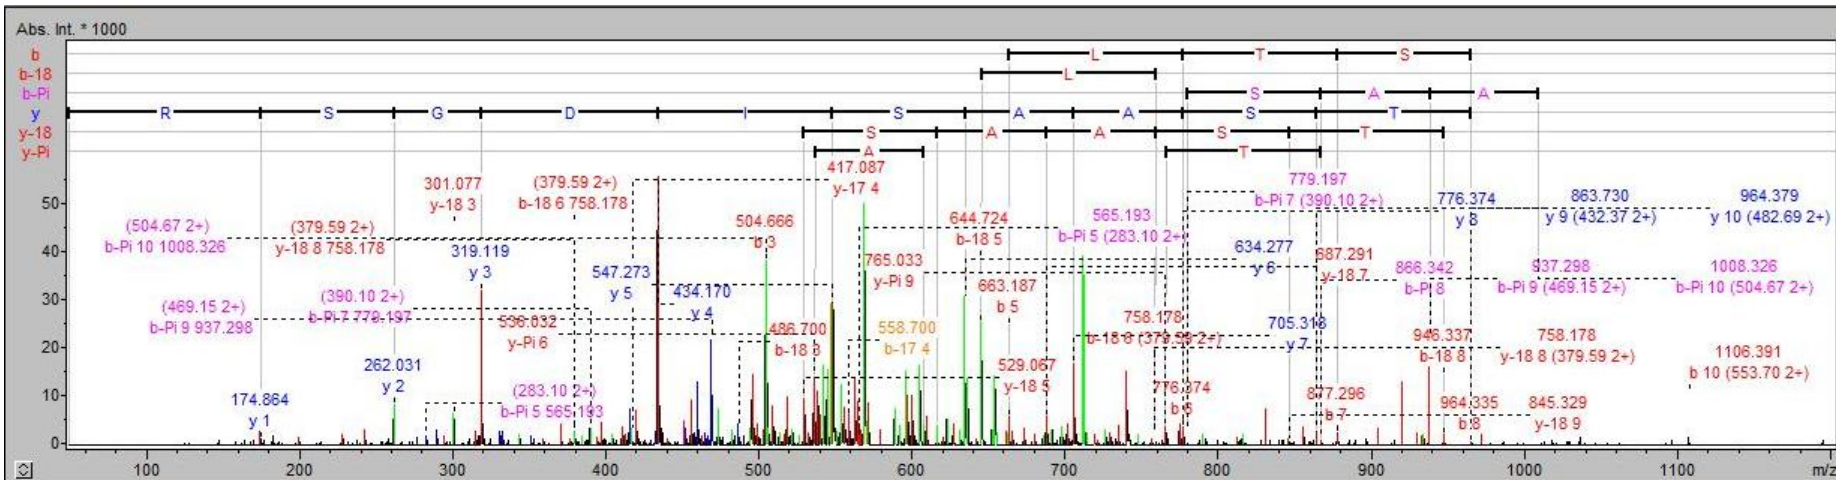

Protein View | Match Errors | MS/MS Fragments | MSMS Analysis

Sequence:

MH+(mono):  MH+(avg):  MS/MS To:  Da Peaks:  Above Threshold:  Zoom to m/z for 2+  Da

Masses:  Monoisotopic  Average Calculate:  Threshold:  Assigned:  Not Assigned:  1+, m/z: 0.000

|      | S  | R  | T  | A  | S  | L  | T  | S | A | A  | S  | I  | D  | G  | S  | R  | Ser     | Arg     | Thr     | Ala     | Ser     | Leu     | Thr     | Ser     | Ala      | Ala      | Ser      | Ile      | Asp      | Gly      |
|------|----|----|----|----|----|----|----|---|---|----|----|----|----|----|----|----|---------|---------|---------|---------|---------|---------|---------|---------|----------|----------|----------|----------|----------|----------|
| Ion  | 1  | 2  | 3  | 4  | 5  | 6  | 7  | 8 | 9 | 10 | 11 | 12 | 13 | 14 | 15 | 16 | 1       | 2       | 3       | 4       | 5       | 6       | 7       | 8       | 9        | 10       | 11       | 12       | 13       | 14       |
| b    | S* | R  | T* | A  | S  | L  | T  | S | A | A  | S  | I  | D  | G  | S  | R  | 168.006 | 324.107 | 505.121 | 576.158 | 663.190 | 776.274 | 877.322 | 964.354 | 1035.391 | 1106.428 | 1193.460 | 1306.544 | 1421.571 | 1478.000 |
| b-17 | S* | R  | T* | A  | S  | L  | T  | S | A | A  | S  | I  | D  | G  | S  | R  | -       | 307.080 | 488.094 | 559.131 | 646.163 | 759.247 | 860.295 | 947.327 | 1018.364 | 1089.401 | 1176.433 | 1289.517 | 1404.544 | 1461.000 |
| b-18 | S* | R  | T* | A  | S  | L  | T  | S | A | A  | S  | I  | D  | G  | S  | R  | 149.995 | 306.096 | 487.110 | 558.147 | 645.179 | 758.263 | 859.311 | 946.343 | 1017.380 | 1088.417 | 1175.449 | 1288.533 | 1403.560 | 1460.000 |
| b-Pi | S* | R  | T* | A  | S  | L  | T  | S | A | A  | S  | I  | D  | G  | S  | R  | 70.029  | 226.130 | 407.144 | 478.181 | 565.213 | 678.297 | 779.345 | 866.377 | 937.414  | 1008.451 | 1095.483 | 1208.567 | 1323.594 | 1380.000 |
| y    | S* | R  | T* | A  | S  | L  | T  | S | A | A  | S  | I  | D  | G  | S  | R  | 175.119 | 262.151 | 319.172 | 434.199 | 547.283 | 634.315 | 705.353 | 776.390 | 863.422  | 964.469  | 1077.553 | 1164.586 | 1235.623 | 1416.000 |
| y-17 | S* | R  | T* | A  | S  | L  | T  | S | A | A  | S  | I  | D  | G  | S  | R  | 158.092 | 245.124 | 302.146 | 417.173 | 530.257 | 617.289 | 688.326 | 759.363 | 846.395  | 947.443  | 1060.527 | 1147.559 | 1218.596 | 1399.000 |
| y-18 | S* | R  | T* | A  | S  | L  | T  | S | A | A  | S  | I  | D  | G  | S  | R  | -       | 244.140 | 301.162 | 416.189 | 529.273 | 616.305 | 687.342 | 758.379 | 845.411  | 946.459  | 1059.543 | 1146.575 | 1217.612 | 1398.000 |
| y-Pi | S* | R  | T* | A  | S  | L  | T  | S | A | A  | S  | I  | D  | G  | S  | R  | -       | 164.174 | 221.196 | 336.222 | 449.307 | 536.339 | 607.376 | 678.413 | 765.445  | 866.493  | 979.577  | 1066.609 | 1137.646 | 1318.000 |
|      | 16 | 15 | 14 | 13 | 12 | 11 | 10 | 9 | 8 | 7  | 6  | 5  | 4  | 3  | 2  | 1  | Arg     | Ser     | Gly     | Asp     | Ile     | Ser     | Ala     | Ala     | Ser      | Thr      | Leu      | Ser      | Ala      | Thr      |



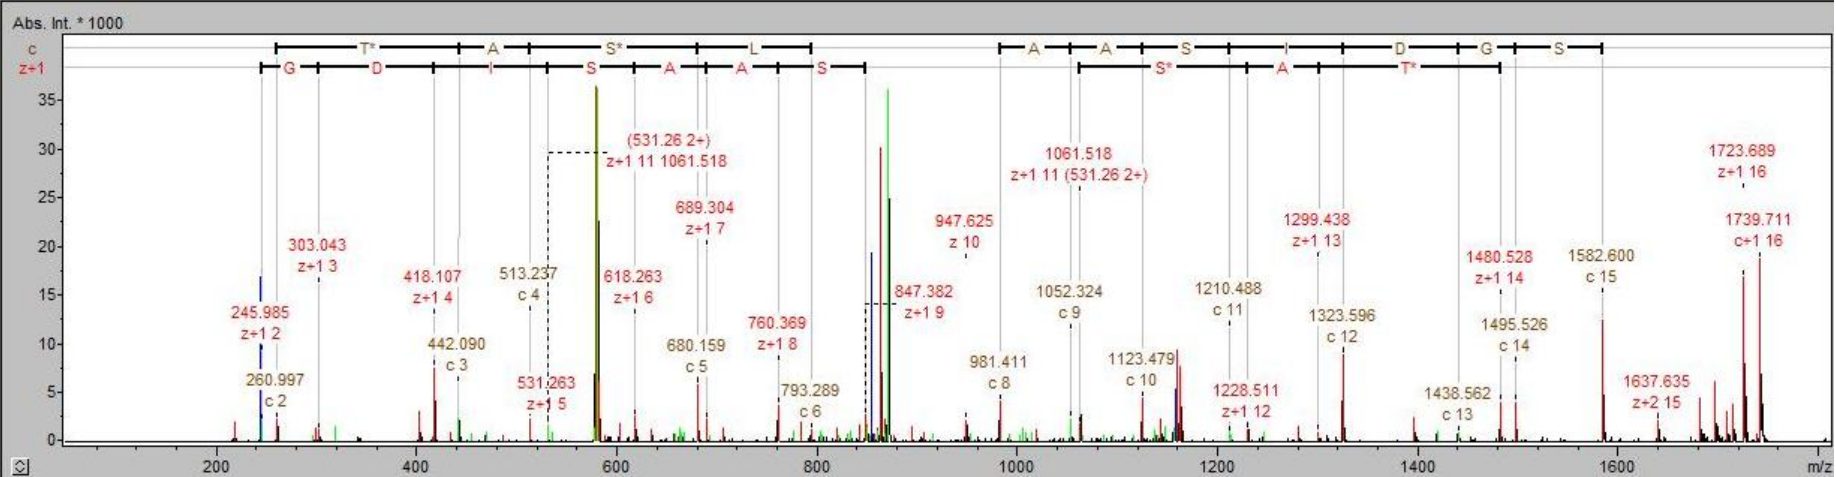

Protein View | Match Errors | MS/MS Fragments | MSMS Analysis

Sequence: SRTASLTSAASIDGSR (Peptide Mods: 3: Phospho (ST) 5: Phospho (ST))

MH+(mono): 1739.736    MH+(avg): 1740.639    MS/MS To: 0.500 Da    Peaks: 112    Above Threshold: 112    Zoom to m/z for 2+    Zoom +/-: 5 Da

Masses:  Monoisotopic     Average    Calculate: Masses    Threshold: 0.000    Assigned: 29    Not Assigned: 83    1+, m/z: 0.000

|     | S  | R  | T  | A  | S  | L  | T  | S | A | A  | S  | I  | D  | G  | S  | R  | Ser     | Arg     | Thr     | Ala     | Ser     | Leu     | Thr     | Ser     | Ala      | Ala      | Ser      | Ile      | Asp      | Gly    |
|-----|----|----|----|----|----|----|----|---|---|----|----|----|----|----|----|----|---------|---------|---------|---------|---------|---------|---------|---------|----------|----------|----------|----------|----------|--------|
| Ion | 1  | 2  | 3  | 4  | 5  | 6  | 7  | 8 | 9 | 10 | 11 | 12 | 13 | 14 | 15 | 16 | 1       | 2       | 3       | 4       | 5       | 6       | 7       | 8       | 9        | 10       | 11       | 12       | 13       | 14     |
| c   | S  | R  | T* | A  | S* | L  | T  | S | A | A  | S  | I  | D  | G  | S  | R  | 105.066 | 261.167 | 442.181 | 513.218 | 680.216 | 793.301 | 894.348 | 981.380 | 1052.417 | 1123.454 | 1210.486 | 1323.571 | 1438.597 | 1495.6 |
| c+1 | S  | R  | T* | A  | S* | L  | T  | S | A | A  | S  | I  | D  | G  | S  | R  | 106.074 | 262.175 | 443.189 | 514.226 | 681.224 | 794.308 | 895.356 | 982.388 | 1053.425 | 1124.462 | 1211.494 | 1324.578 | 1439.605 | 1496.6 |
| z   | S  | R  | T* | A  | S* | L  | T  | S | A | A  | S  | I  | D  | G  | S  | R  | 158.092 | 245.124 | 302.146 | 417.173 | 530.257 | 617.289 | 688.326 | 759.363 | 846.395  | 947.443  | 1060.527 | 1227.525 | 1298.562 | 1479.5 |
| z+1 | S  | R  | T* | A  | S* | L  | T  | S | A | A  | S  | I  | D  | G  | S  | R  | 159.100 | 246.132 | 303.154 | 418.181 | 531.265 | 618.297 | 689.334 | 760.371 | 847.403  | 948.451  | 1061.535 | 1228.533 | 1299.570 | 1480.5 |
| z+2 | S  | R  | T* | A  | S* | L  | T  | S | A | A  | S  | I  | D  | G  | S  | R  | 160.108 | 247.140 | 304.162 | 419.188 | 532.273 | 619.305 | 690.342 | 761.379 | 848.411  | 949.459  | 1062.543 | 1229.541 | 1300.578 | 1481.5 |
|     | 16 | 15 | 14 | 13 | 12 | 11 | 10 | 9 | 8 | 7  | 6  | 5  | 4  | 3  | 2  | 1  | Arg     | Ser     | Gly     | Asp     | Ile     | Ser     | Ala     | Ala     | Ser      | Thr      | Leu      | Ser      | Ala      | Thr    |

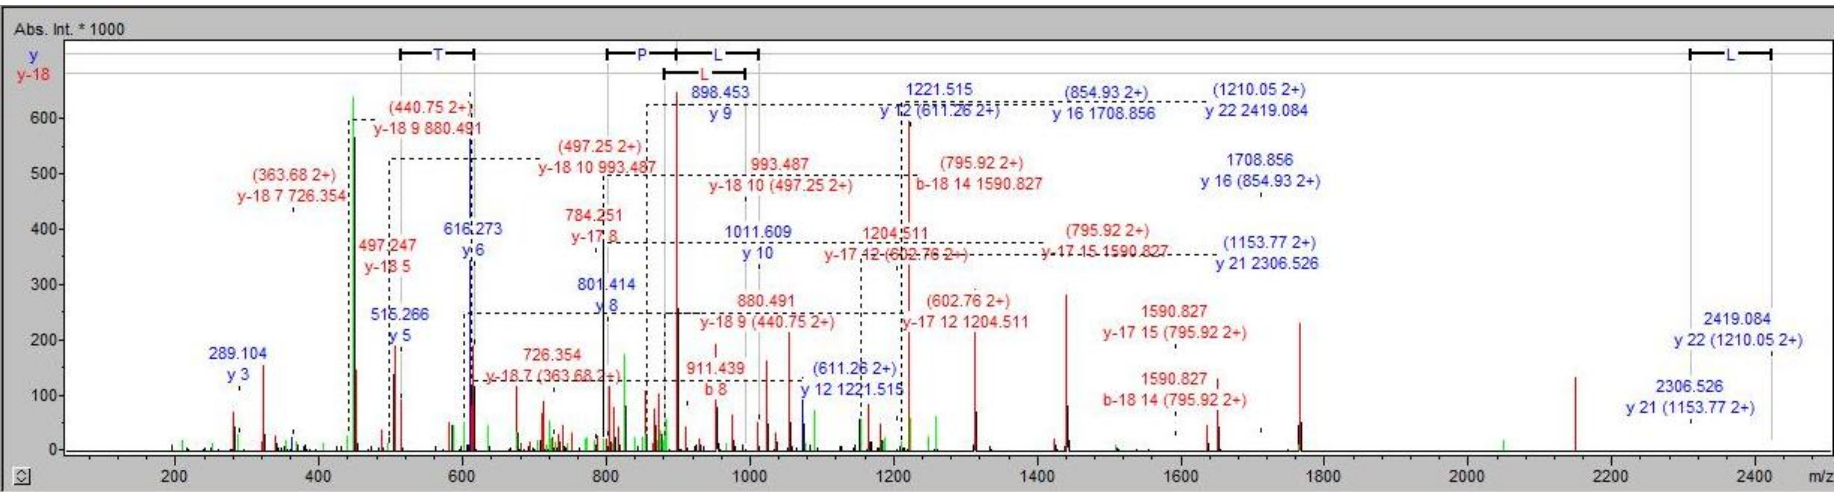

Protein View | Match Errors | MS/MS Fragments | MSMS Analysis

Sequence: AELQEVQITEEKPLLPQGQTPEAAK (Peptide Mods: 12: Acetyl (K))

MH+(mono): 2619.388    MH+(avg): 2620.930    MS/MS ToI: 0.500    Da    Peaks: 99    Above Threshold: 99    Zoom to m/z for 2+    Zoom +/-: 5    Da

Masses:  Monoisotopic     Average    Calculate: Masses    Threshold: 0.000    Assigned: 19    Not Assigned: 80    1+, m/z: 0.000

|      | A  | E  | L  | Q  | E  | V  | Q  | I  | T  | E  | E  | K  | P  | L  | L  | P  | Q  | T  | P  | E  | A  | A  | K  | Ala     | Glu     | Leu     | Gln     | Glu     | Val     | Gln     | Ile     | Thr      | Glu      | Glu      | Lys  |     |
|------|----|----|----|----|----|----|----|----|----|----|----|----|----|----|----|----|----|----|----|----|----|----|----|---------|---------|---------|---------|---------|---------|---------|---------|----------|----------|----------|------|-----|
| Ion  | 1  | 2  | 3  | 4  | 5  | 6  | 7  | 8  | 9  | 10 | 11 | 12 | 13 | 14 | 15 | 16 | 17 | 18 | 19 | 20 | 21 | 22 | 23 | 24      | 1       | 2       | 3       | 4       | 5       | 6       | 7       | 8        | 9        | 10       | 11   | 12  |
| b    | A  | E  | L  | Q  | E  | V  | Q  | I  | T  | E  | E  | K* | P  | L  | L  | P  | Q  | T  | P  | E  | A  | A  | K  | 72.044  | 201.087 | 314.171 | 442.230 | 571.272 | 670.341 | 798.399 | 911.483 | 1012.531 | 1141.574 | 1270.616 | 1398 |     |
| b-17 | A  | E  | L  | Q  | E  | V  | Q  | I  | T  | E  | E  | K* | P  | L  | L  | P  | Q  | T  | P  | E  | A  | A  | K  | -       | -       | -       | 425.203 | 554.246 | 653.314 | 781.373 | 894.457 | 995.504  | 1124.547 | 1253.590 | 1381 |     |
| b-18 | A  | E  | L  | Q  | E  | V  | Q  | I  | T  | E  | E  | K* | P  | L  | L  | P  | Q  | T  | P  | E  | A  | A  | K  | -       | 183.076 | 296.160 | 424.219 | 553.262 | 652.330 | 780.389 | 893.473 | 994.520  | 1123.563 | 1252.606 | 1380 |     |
| y    | A  | E  | L  | Q  | E  | V  | Q  | I  | T  | E  | E  | K* | P  | L  | L  | P  | Q  | T  | P  | E  | A  | A  | K  | 147.113 | 218.150 | 289.187 | 418.230 | 515.282 | 616.330 | 744.389 | 801.410 | 898.463  | 1011.547 | 1124.631 | 1221 |     |
| y-17 | A  | E  | L  | Q  | E  | V  | Q  | I  | T  | E  | E  | K* | P  | L  | L  | P  | Q  | T  | P  | E  | A  | A  | K  | 130.086 | 201.123 | 272.160 | 401.203 | 498.256 | 599.304 | 727.362 | 784.384 | 881.436  | 994.520  | 1107.604 | 1204 |     |
| y-18 | A  | E  | L  | Q  | E  | V  | Q  | I  | T  | E  | E  | K* | P  | L  | L  | P  | Q  | T  | P  | E  | A  | A  | K  | -       | -       | -       | 400.219 | 497.272 | 598.320 | 726.378 | 783.400 | 880.452  | 993.536  | 1106.620 | 1203 |     |
|      | 24 | 23 | 22 | 21 | 20 | 19 | 18 | 17 | 16 | 15 | 14 | 13 | 12 | 11 | 10 | 9  | 8  | 7  | 6  | 5  | 4  | 3  | 2  | 1       | Lys     | Ala     | Ala     | Glu     | Pro     | Thr     | Gln     | Gly      | Pro      | Leu      | Leu  | Pro |



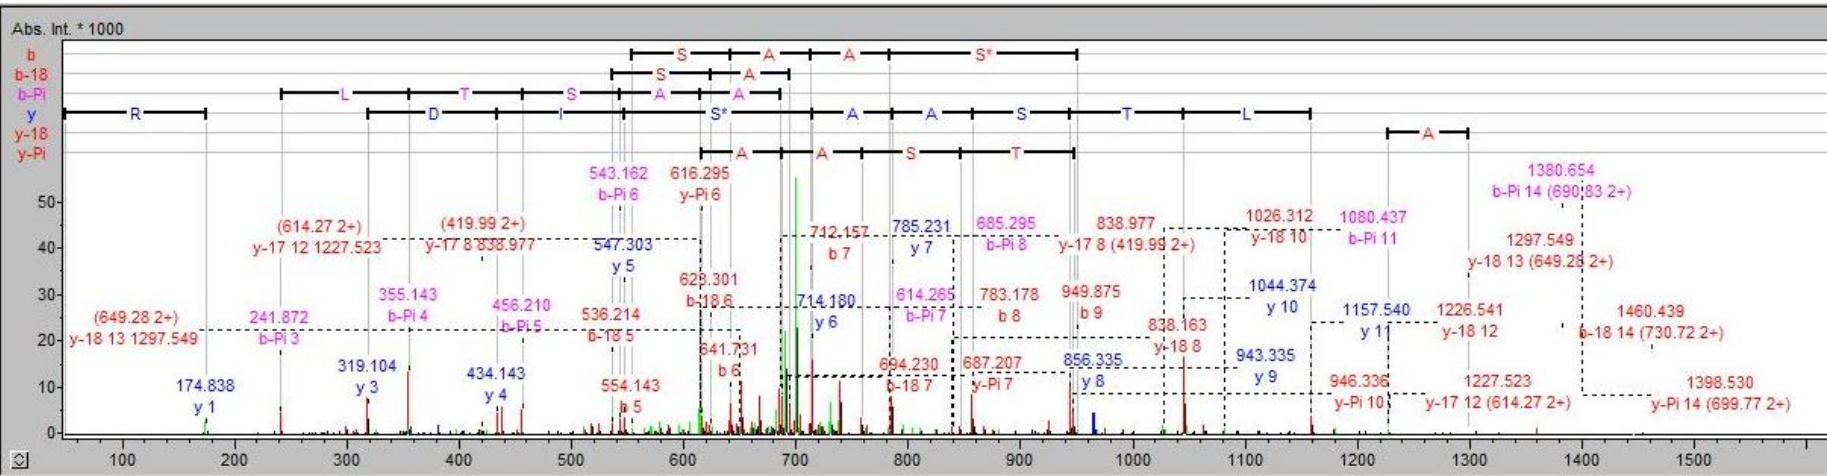

Protein View | Match Errors | MS/MS Fragments | MSMS Analysis

Sequence: T A S L T S A A S I D G S R (Peptide Mods: 1: Phospho (ST) 9: Phospho (ST))

MH+(mono): 1496.603    MH+(avg): 1497.376    MS/MS Tol: 0.500 Da    Peaks: 110    Above Threshold: 110    Zoom to m/z for 2+    Zoom +/-: 5 Da  
 Masses:  Monoisotopic     Average    Calculate: Masses    Threshold: 0.000    Assigned: 39    Not Assigned: 71    1+, m/z: 0.000

|      | T  | A  | S  | L  | T  | S | A | A | S  | I  | D  | G  | S  | R  | Thr | Ala     | Ser     | Leu     | Thr     | Ser     | Ala     | Ala     | Ser     | Ile     | Asp      | Gly      | Ser      | Arg      |          |
|------|----|----|----|----|----|---|---|---|----|----|----|----|----|----|-----|---------|---------|---------|---------|---------|---------|---------|---------|---------|----------|----------|----------|----------|----------|
| Ion  | 1  | 2  | 3  | 4  | 5  | 6 | 7 | 8 | 9  | 10 | 11 | 12 | 13 | 14 | 1   | 2       | 3       | 4       | 5       | 6       | 7       | 8       | 9       | 10      | 11       | 12       | 13       | 14       |          |
| b    | T* | A  | S  | L  | T  | S | A | A | S* | I  | D  | G  | S  | R  |     | 182.021 | 253.058 | 340.090 | 453.174 | 554.222 | 641.254 | 712.291 | 783.328 | 950.327 | 1063.411 | 1178.438 | 1235.459 | 1322.491 | 1478.592 |
| b-17 | T* | A  | S  | L  | T  | S | A | A | S* | I  | D  | G  | S  | R  |     | -       | -       | -       | -       | -       | -       | -       | -       | -       | -        | -        | -        | -        | 1461.566 |
| b-18 | T* | A  | S  | L  | T  | S | A | A | S* | I  | D  | G  | S  | R  |     | 164.011 | 235.048 | 322.080 | 435.164 | 536.212 | 623.244 | 694.281 | 765.318 | 932.316 | 1045.400 | 1160.427 | 1217.449 | 1304.481 | 1460.582 |
| b-Pi | T* | A  | S  | L  | T  | S | A | A | S* | I  | D  | G  | S  | R  |     | 84.044  | 155.082 | 242.114 | 355.198 | 456.245 | 543.277 | 614.314 | 685.352 | 852.350 | 965.434  | 1080.461 | 1137.482 | 1224.514 | 1380.615 |
| y    | T* | A  | S  | L  | T  | S | A | A | S* | I  | D  | G  | S  | R  |     | 175.119 | 262.151 | 319.172 | 434.199 | 547.283 | 714.282 | 785.319 | 856.356 | 943.388 | 1044.436 | 1157.520 | 1244.552 | 1315.589 | 1496.603 |
| y-17 | T* | A  | S  | L  | T  | S | A | A | S* | I  | D  | G  | S  | R  |     | 158.092 | 245.124 | 302.146 | 417.173 | 530.257 | 697.255 | 768.292 | 839.329 | 926.362 | 1027.409 | 1140.493 | 1227.525 | 1298.562 | 1479.576 |
| y-18 | T* | A  | S  | L  | T  | S | A | A | S* | I  | D  | G  | S  | R  |     | -       | 244.140 | 301.162 | 416.189 | 529.273 | 696.271 | 767.308 | 838.345 | 925.378 | 1026.425 | 1139.509 | 1226.541 | 1297.578 | 1478.592 |
| y-Pi | T* | A  | S  | L  | T  | S | A | A | S* | I  | D  | G  | S  | R  |     | -       | 164.174 | 221.196 | 336.222 | 449.307 | 616.305 | 687.342 | 758.379 | 845.411 | 946.459  | 1059.543 | 1146.575 | 1217.612 | 1398.626 |
|      | 14 | 13 | 12 | 11 | 10 | 9 | 8 | 7 | 6  | 5  | 4  | 3  | 2  | 1  | Arg | Ser     | Gly     | Asp     | Ile     | Ser     | Ala     | Ala     | Ser     | Thr     | Leu      | Ser      | Ala      | Thr      |          |

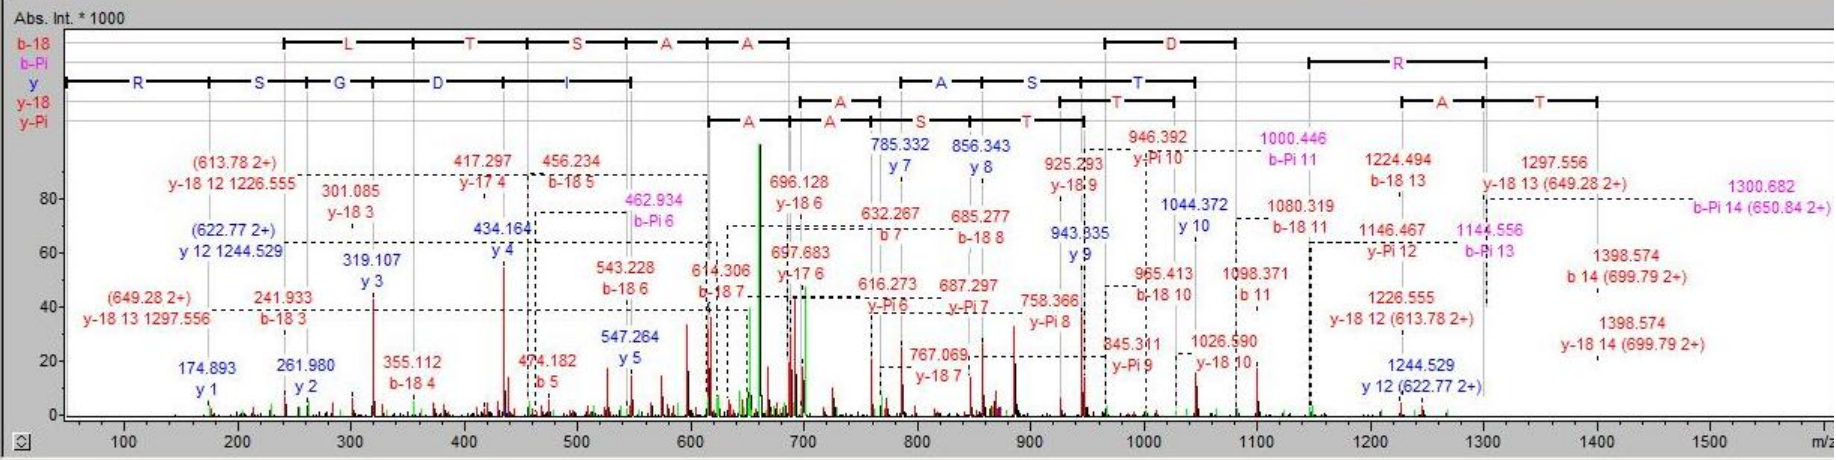

Protein View | Match Errors | MS/MS Fragments | MSMS Analysis

Sequence: **TASLTSAASIDGSR** (Peptide Mods: 9: Phospho (ST))

MH+(mono): 1416.637    MH+(avg): 1417.396    MS/MS Tol: 0.500 Da    Peaks: 134    Above Threshold: 134    Zoom to m/z for 2+    Zoom +/-: 5 Da

Masses:  Monoisotopic     Average    Calculate: Masses    Threshold: 0.000    Assigned: 44    Not Assigned: 90    1+, m/z: 0.000

|      | T  | A  | S  | L  | T  | S | A | A | S  | I  | D  | G  | S  | R  | Thr | Ala     | Ser     | Leu     | Thr     | Ser     | Ala     | Ala     | Ser     | Ile     | Asp      | Gly      | Ser      | Arg      |          |
|------|----|----|----|----|----|---|---|---|----|----|----|----|----|----|-----|---------|---------|---------|---------|---------|---------|---------|---------|---------|----------|----------|----------|----------|----------|
| Ion  | 1  | 2  | 3  | 4  | 5  | 6 | 7 | 8 | 9  | 10 | 11 | 12 | 13 | 14 | 1   | 2       | 3       | 4       | 5       | 6       | 7       | 8       | 9       | 10      | 11       | 12       | 13       | 14       |          |
| b    | T  | A  | S  | L  | T  | S | A | A | S* | I  | D  | G  | S  | R  |     | 102.055 | 173.092 | 260.124 | 373.208 | 474.256 | 561.288 | 632.325 | 703.362 | 870.360 | 983.445  | 1098.471 | 1155.493 | 1242.525 | 1398.626 |
| b-17 | T  | A  | S  | L  | T  | S | A | A | S* | I  | D  | G  | S  | R  |     | -       | -       | -       | -       | -       | -       | -       | -       | -       | -        | -        | -        | -        | 1381.600 |
| b-18 | T  | A  | S  | L  | T  | S | A | A | S* | I  | D  | G  | S  | R  |     | 84.044  | 155.082 | 242.114 | 355.198 | 456.245 | 543.277 | 614.314 | 685.352 | 852.350 | 965.434  | 1080.461 | 1137.482 | 1224.514 | 1380.615 |
| b-PI | T  | A  | S  | L  | T  | S | A | A | S* | I  | D  | G  | S  | R  |     | 4.078   | 75.115  | 162.147 | 275.231 | 376.279 | 463.311 | 534.348 | 605.385 | 772.384 | 885.468  | 1000.495 | 1057.516 | 1144.548 | 1300.649 |
| y    | T  | A  | S  | L  | T  | S | A | A | S* | I  | D  | G  | S  | R  |     | 175.119 | 262.151 | 319.172 | 434.199 | 547.283 | 714.282 | 785.319 | 856.356 | 943.388 | 1044.436 | 1157.520 | 1244.552 | 1315.589 | 1416.637 |
| y-17 | T  | A  | S  | L  | T  | S | A | A | S* | I  | D  | G  | S  | R  |     | 158.092 | 245.124 | 302.146 | 417.173 | 530.257 | 697.255 | 768.292 | 839.329 | 926.362 | 1027.409 | 1140.493 | 1227.525 | 1298.562 | 1399.610 |
| y-18 | T  | A  | S  | L  | T  | S | A | A | S* | I  | D  | G  | S  | R  |     | -       | 244.140 | 301.162 | 416.189 | 529.273 | 696.271 | 767.308 | 838.345 | 925.378 | 1026.425 | 1139.509 | 1226.541 | 1297.578 | 1398.626 |
| y-PI | T  | A  | S  | L  | T  | S | A | A | S* | I  | D  | G  | S  | R  |     | -       | 164.174 | 221.196 | 336.222 | 449.307 | 616.305 | 687.342 | 758.379 | 845.411 | 946.459  | 1059.543 | 1146.575 | 1217.612 | 1318.660 |
|      | 14 | 13 | 12 | 11 | 10 | 9 | 8 | 7 | 6  | 5  | 4  | 3  | 2  | 1  | Arg | Ser     | Gly     | Asp     | Ile     | Ser     | Ala     | Ala     | Ser     | Thr     | Leu      | Ser      | Ala      | Thr      |          |



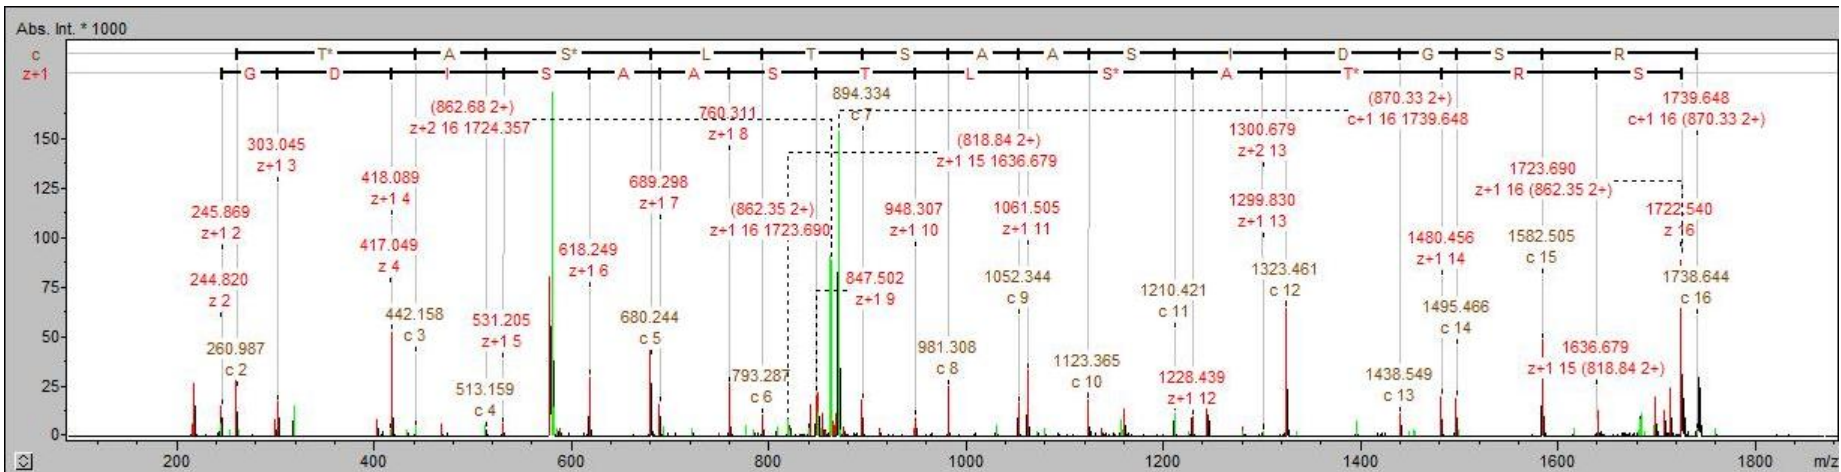

Protein View | Match Errors | MS/MS Fragments | MSMS Analysis

Sequence: SRTAALSTASIDGSR (Peptide Mods: 3: Phospho (ST) 5: Phospho (ST))

MH+(mono): 1739.736    MH+(avg): 1740.639    MS/MS To: 0.500 Da    Peaks: 102    Above Threshold: 102    Zoom to m/z for 2+    Zoom +/-: 5 Da

Masses:  Monoisotopic     Average    Calculate: Masses    Threshold: 0.000    Assigned: 36    Not Assigned: 66    1+, m/z: 0.000

|     | S  | R  | T  | A  | S  | L  | T  | S | A | A  | S  | I  | D  | G  | S  | R  | Ser     | Arg     | Thr     | Ala     | Ser     | Leu     | Thr     | Ser     | Ala      | Ala      | Ser      | Ile      | Asp      | Gly    |
|-----|----|----|----|----|----|----|----|---|---|----|----|----|----|----|----|----|---------|---------|---------|---------|---------|---------|---------|---------|----------|----------|----------|----------|----------|--------|
| Ion | 1  | 2  | 3  | 4  | 5  | 6  | 7  | 8 | 9 | 10 | 11 | 12 | 13 | 14 | 15 | 16 | 1       | 2       | 3       | 4       | 5       | 6       | 7       | 8       | 9        | 10       | 11       | 12       | 13       | 14     |
| c   | S  | R  | T* | A  | S* | L  | T  | S | A | A  | S  | I  | D  | G  | S  | R  | 105.066 | 261.167 | 442.181 | 513.218 | 680.216 | 793.301 | 894.348 | 981.380 | 1052.417 | 1123.454 | 1210.486 | 1323.571 | 1438.597 | 1495.6 |
| c+1 | S  | R  | T* | A  | S* | L  | T  | S | A | A  | S  | I  | D  | G  | S  | R  | 106.074 | 262.175 | 443.189 | 514.226 | 681.224 | 794.308 | 895.356 | 982.388 | 1053.425 | 1124.462 | 1211.494 | 1324.578 | 1439.605 | 1496.6 |
| z   | S  | R  | T* | A  | S* | L  | T  | S | A | A  | S  | I  | D  | G  | S  | R  | 158.092 | 245.124 | 302.146 | 417.173 | 530.257 | 617.289 | 688.326 | 759.363 | 846.395  | 947.443  | 1060.527 | 1227.525 | 1298.562 | 1479.5 |
| z+1 | S  | R  | T* | A  | S* | L  | T  | S | A | A  | S  | I  | D  | G  | S  | R  | 159.100 | 246.132 | 303.154 | 418.181 | 531.265 | 618.297 | 689.334 | 760.371 | 847.403  | 948.451  | 1061.535 | 1228.533 | 1299.570 | 1480.5 |
| z+2 | S  | R  | T* | A  | S* | L  | T  | S | A | A  | S  | I  | D  | G  | S  | R  | 160.108 | 247.140 | 304.162 | 419.188 | 532.273 | 619.305 | 690.342 | 761.379 | 848.411  | 949.459  | 1062.543 | 1229.541 | 1300.578 | 1481.5 |
|     | 16 | 15 | 14 | 13 | 12 | 11 | 10 | 9 | 8 | 7  | 6  | 5  | 4  | 3  | 2  | 1  | Arg     | Ser     | Gly     | Asp     | Ile     | Ser     | Ala     | Ala     | Ser      | Thr      | Leu      | Ser      | Ala      | Thr    |

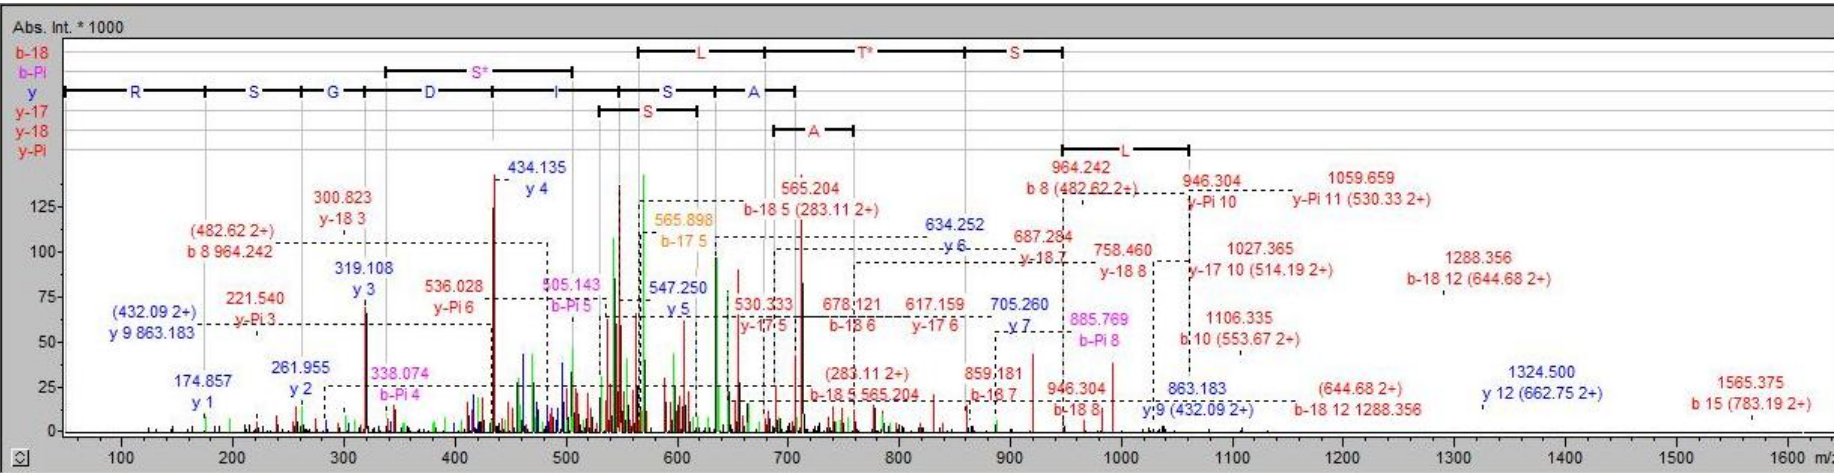

Protein View | Match Errors | MS/MS Fragments | MSMS Analysis

Sequence: **SRTASLTSAASIDGSR** (Peptide Mods: 5: Phosfo (ST) 7: Phosfo (ST))

MH+(mono): 1739.736    MH+(avg): 1740.639    MS/MS Tol: 0.500    Da    Peaks: 124    Above Threshold: 124    Zoom to m/z for 2+    Zoom +/-: 5    Da

Masses:  Monoisotopic     Average    Calculate: Masses    Threshold: 0.000    Assigned: 32    Not Assigned: 92    1+, m/z: 0.000

|      | S  | R  | T  | A  | S  | L  | T  | S | A | A  | S  | I  | D  | G  | S  | R  | Ser     | Arg     | Thr     | Ala     | Ser     | Leu     | Thr     | Ser     | Ala      | Ala      | Ser      | Ile      | Asp      | Gly  |
|------|----|----|----|----|----|----|----|---|---|----|----|----|----|----|----|----|---------|---------|---------|---------|---------|---------|---------|---------|----------|----------|----------|----------|----------|------|
| Ion  | 1  | 2  | 3  | 4  | 5  | 6  | 7  | 8 | 9 | 10 | 11 | 12 | 13 | 14 | 15 | 16 | 1       | 2       | 3       | 4       | 5       | 6       | 7       | 8       | 9        | 10       | 11       | 12       | 13       | 14   |
| b    | S  | R  | T  | A  | S* | L  | T* | S | A | A  | S  | I  | D  | G  | S  | R  | 88.039  | 244.140 | 345.188 | 416.225 | 583.224 | 696.308 | 877.322 | 964.354 | 1035.391 | 1106.428 | 1193.460 | 1306.544 | 1421.571 | 1478 |
| b-17 | S  | R  | T  | A  | S* | L  | T* | S | A | A  | S  | I  | D  | G  | S  | R  | -       | 227.114 | 328.162 | 399.199 | 566.197 | 679.281 | 860.295 | 947.327 | 1018.364 | 1089.401 | 1176.433 | 1289.517 | 1404.544 | 1461 |
| b-18 | S  | R  | T  | A  | S* | L  | T* | S | A | A  | S  | I  | D  | G  | S  | R  | 70.029  | 226.130 | 327.178 | 398.215 | 565.213 | 678.297 | 859.311 | 946.343 | 1017.380 | 1088.417 | 1175.449 | 1288.533 | 1403.560 | 1460 |
| b-Pi | S  | R  | T  | A  | S* | L  | T* | S | A | A  | S  | I  | D  | G  | S  | R  | -       | 166.039 | 267.086 | 338.123 | 505.122 | 618.206 | 799.220 | 886.252 | 957.289  | 1028.326 | 1115.358 | 1228.442 | 1343.469 | 1400 |
| y    | S  | R  | T  | A  | S* | L  | T* | S | A | A  | S  | I  | D  | G  | S  | R  | 175.119 | 262.151 | 319.172 | 434.199 | 547.283 | 634.315 | 705.353 | 776.390 | 863.422  | 1044.436 | 1157.520 | 1324.518 | 1395.555 | 1496 |
| y-17 | S  | R  | T  | A  | S* | L  | T* | S | A | A  | S  | I  | D  | G  | S  | R  | 158.092 | 245.124 | 302.146 | 417.173 | 530.257 | 617.289 | 688.326 | 759.363 | 846.395  | 1027.409 | 1140.493 | 1307.492 | 1378.529 | 1479 |
| y-18 | S  | R  | T  | A  | S* | L  | T* | S | A | A  | S  | I  | D  | G  | S  | R  | -       | 244.140 | 301.162 | 416.189 | 529.273 | 616.305 | 687.342 | 758.379 | 845.411  | 1026.425 | 1139.509 | 1306.508 | 1377.545 | 1478 |
| y-Pi | S  | R  | T  | A  | S* | L  | T* | S | A | A  | S  | I  | D  | G  | S  | R  | -       | 164.174 | 221.196 | 336.222 | 449.307 | 536.339 | 607.376 | 678.413 | 765.445  | 946.459  | 1059.543 | 1226.541 | 1297.578 | 1398 |
|      | 16 | 15 | 14 | 13 | 12 | 11 | 10 | 9 | 8 | 7  | 6  | 5  | 4  | 3  | 2  | 1  | Arg     | Ser     | Gly     | Asp     | Ile     | Ser     | Ala     | Ala     | Ser      | Thr      | Leu      | Ser      | Ala      | Thr  |



Abs. Int. \* 1000

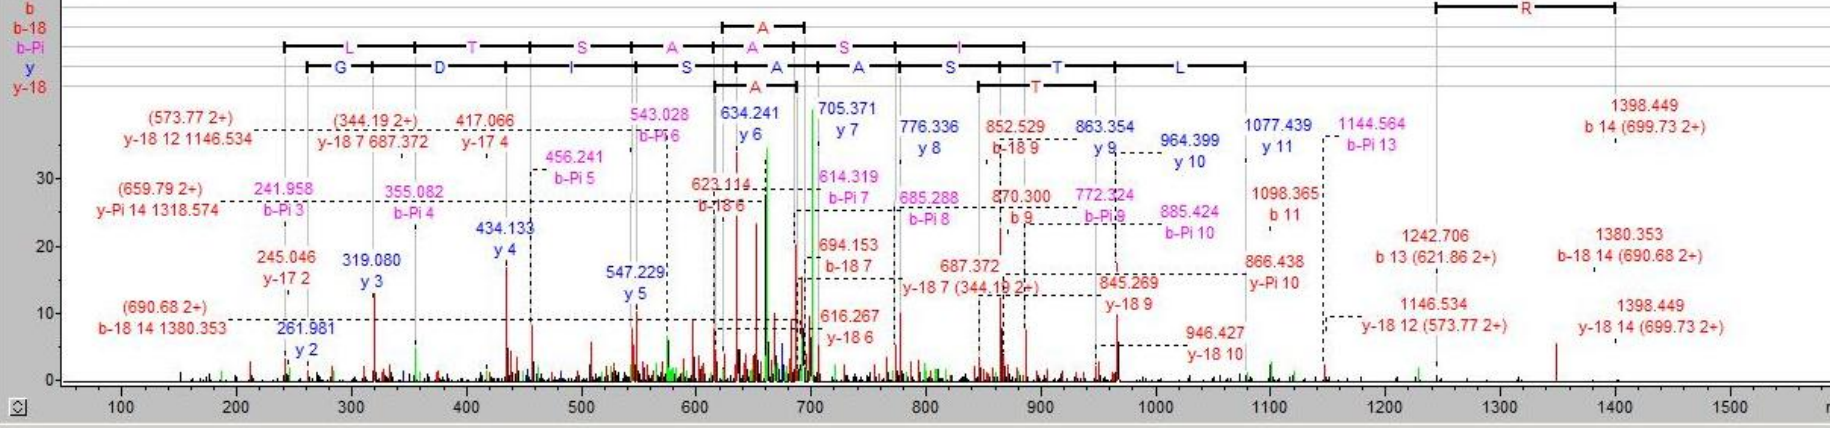

Protein View | Match Errors | MS/MS Fragments | MSMS Analysis

Sequence: **TASLTSAAIDGSR** (Peptide Mods: 1: Phospho (ST))

MH+(mono): 1416.637    MH+(avg): 1417.396    MS/MS Tol: 0.500 Da    Peaks: 139    Above Threshold: 139    Zoom to m/z for 2+    Zoom +/-: 5 Da  
 Masses:  Monoisotopic     Average    Calculate: Masses    Threshold: 0.000    Assigned: 37    Not Assigned: 102    1+, m/z: 0.000

|      | T  | A  | S  | L  | T  | S | A | A | S | I  | D  | G  | S  | R  | Thr | Ala     | Ser     | Leu     | Thr     | Ser     | Ala     | Ala     | Ser     | Ile     | Asp     | Gly      | Ser      | Arg      |          |
|------|----|----|----|----|----|---|---|---|---|----|----|----|----|----|-----|---------|---------|---------|---------|---------|---------|---------|---------|---------|---------|----------|----------|----------|----------|
| Ion  | 1  | 2  | 3  | 4  | 5  | 6 | 7 | 8 | 9 | 10 | 11 | 12 | 13 | 14 | 1   | 2       | 3       | 4       | 5       | 6       | 7       | 8       | 9       | 10      | 11      | 12       | 13       | 14       |          |
| b    | T* | A  | S  | L  | T  | S | A | A | S | I  | D  | G  | S  | R  |     | 182.021 | 253.058 | 340.090 | 453.174 | 554.222 | 641.254 | 712.291 | 783.328 | 870.360 | 983.445 | 1098.471 | 1155.493 | 1242.525 | 1398.626 |
| b-17 | T* | A  | S  | L  | T  | S | A | A | S | I  | D  | G  | S  | R  |     | -       | -       | -       | -       | -       | -       | -       | -       | -       | -       | -        | -        | -        | 1381.600 |
| b-18 | T* | A  | S  | L  | T  | S | A | A | S | I  | D  | G  | S  | R  |     | 164.011 | 235.048 | 322.080 | 435.164 | 536.212 | 623.244 | 694.281 | 765.318 | 852.350 | 965.434 | 1080.461 | 1137.482 | 1224.514 | 1380.615 |
| b-Pi | T* | A  | S  | L  | T  | S | A | A | S | I  | D  | G  | S  | R  |     | 84.044  | 155.082 | 242.114 | 355.198 | 456.245 | 543.277 | 614.314 | 685.352 | 772.384 | 885.468 | 1000.495 | 1057.516 | 1144.548 | 1300.649 |
| y    | T* | A  | S  | L  | T  | S | A | A | S | I  | D  | G  | S  | R  |     | 175.119 | 262.151 | 319.172 | 434.199 | 547.283 | 634.315 | 705.353 | 776.390 | 863.422 | 964.469 | 1077.553 | 1164.586 | 1235.623 | 1416.637 |
| y-17 | T* | A  | S  | L  | T  | S | A | A | S | I  | D  | G  | S  | R  |     | 158.092 | 245.124 | 302.146 | 417.173 | 530.257 | 617.289 | 688.326 | 759.363 | 846.395 | 947.443 | 1060.527 | 1147.559 | 1218.596 | 1399.610 |
| y-18 | T* | A  | S  | L  | T  | S | A | A | S | I  | D  | G  | S  | R  |     | -       | 244.140 | 301.162 | 416.189 | 529.273 | 616.305 | 687.342 | 758.379 | 845.411 | 946.459 | 1059.543 | 1146.575 | 1217.612 | 1398.626 |
| y-Pi | T* | A  | S  | L  | T  | S | A | A | S | I  | D  | G  | S  | R  |     | -       | 164.174 | 221.196 | 336.222 | 449.307 | 536.339 | 607.376 | 678.413 | 765.445 | 866.493 | 979.577  | 1066.609 | 1137.646 | 1318.660 |
|      | 14 | 13 | 12 | 11 | 10 | 9 | 8 | 7 | 6 | 5  | 4  | 3  | 2  | 1  | Arg | Ser     | Gly     | Asp     | Ile     | Ser     | Ala     | Ala     | Ser     | Thr     | Leu     | Ser      | Ala      | Thr      |          |

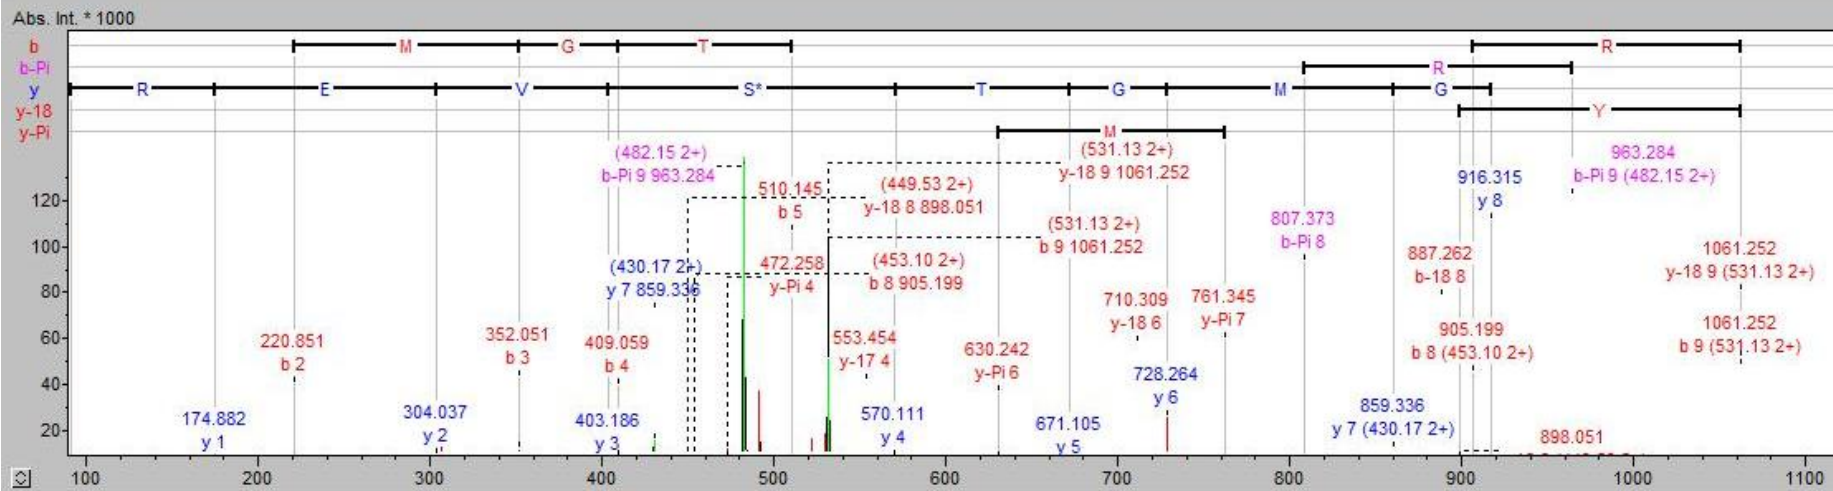

Sequence: YGMGTSVER (Peptide Mods: 6: Phospho (ST))

MH+(mono): 1079.423

MH+(avg): 1080.090

MS/MS Tol: 0.500

Da

Peaks: 97

Above Threshold: 97

Zoom to m/z for 2+

Zoom +/-: 5 Da

Masses:

Monoisotopic  Average

Calculate: Masses

Threshold: 0.000

Assigned: 24

Not Assigned: 73

1+, m/z: 0.000

|      | Y | G | M | G | T | S* | V | E | R | Tyr     | Gly     | Met     | Gly     | Thr     | Ser     | Val     | Glu     | Arg      |
|------|---|---|---|---|---|----|---|---|---|---------|---------|---------|---------|---------|---------|---------|---------|----------|
| Ion  | 1 | 2 | 3 | 4 | 5 | 6  | 7 | 8 | 9 | 1       | 2       | 3       | 4       | 5       | 6       | 7       | 8       | 9        |
| b    | Y | G | M | G | T | S* | V | E | R | 164.071 | 221.092 | 352.133 | 409.154 | 510.202 | 677.200 | 776.268 | 905.311 | 1061.412 |
| b-17 | Y | G | M | G | T | S* | V | E | R | -       | -       | -       | -       | -       | -       | -       | -       | 1044.386 |
| b-18 | Y | G | M | G | T | S* | V | E | R | -       | -       | -       | -       | 492.191 | 659.189 | 758.258 | 887.300 | 1043.402 |
| b-PI | Y | G | M | G | T | S* | V | E | R | -       | -       | -       | -       | 412.225 | 579.223 | 678.292 | 807.334 | 963.435  |
| y    | Y | G | M | G | T | S* | V | E | R | 175.119 | 304.162 | 403.230 | 570.228 | 671.276 | 728.297 | 859.338 | 916.359 | 1079.423 |
| y-17 | Y | G | M | G | T | S* | V | E | R | 158.092 | 287.135 | 386.203 | 553.202 | 654.249 | 711.271 | 842.311 | 899.333 | 1062.396 |
| y-18 | Y | G | M | G | T | S* | V | E | R | -       | 286.151 | 385.219 | 552.218 | 653.265 | 710.287 | 841.327 | 898.349 | 1061.412 |
| y-PI | Y | G | M | G | T | S* | V | E | R | -       | -       | -       | 472.251 | 573.299 | 630.321 | 761.361 | 818.383 | 981.446  |
|      | 9 | 8 | 7 | 6 | 5 | 4  | 3 | 2 | 1 | Arg     | Glu     | Val     | Ser     | Thr     | Gly     | Met     | Gly     | Tyr      |



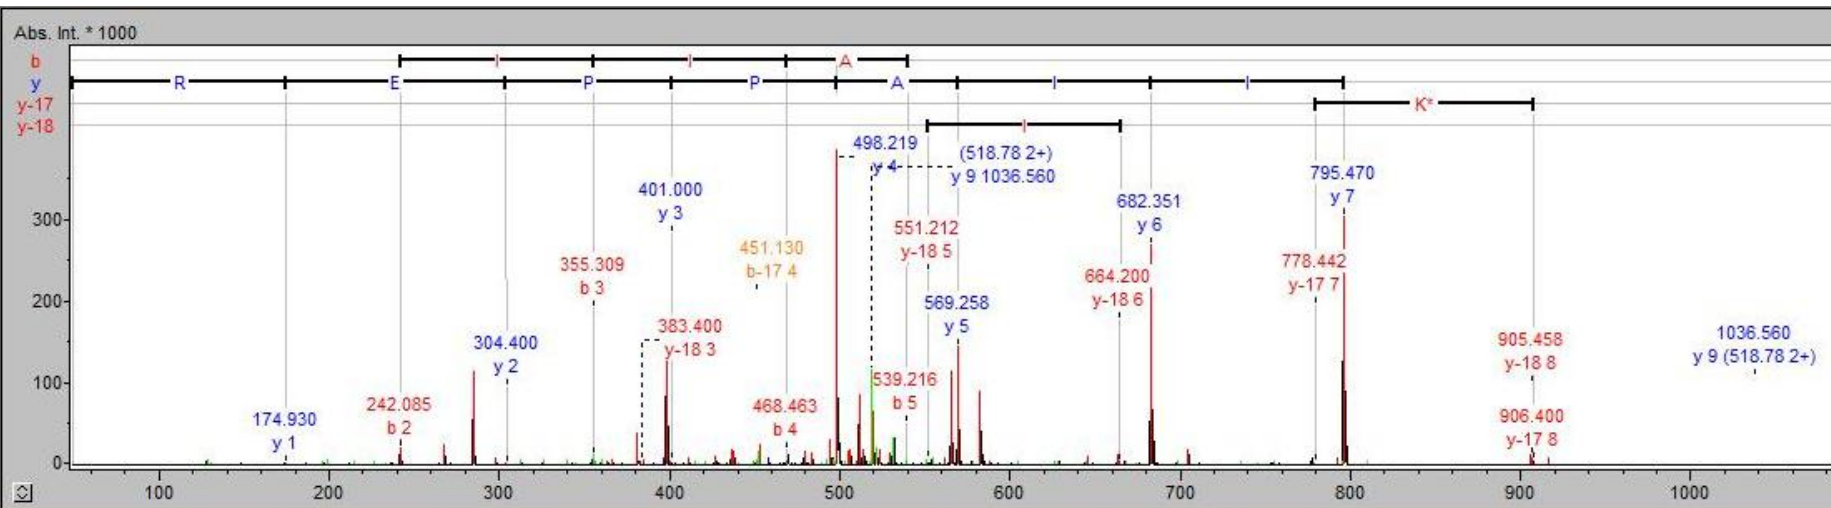

Protein View | Match Errors | MS/MS Fragments | MSMS Analysis

Sequence: **IKIAPPER** (Peptide Mods: 2: Acetyl (K))

MH+(mono): 1036.651    MH+(avg): 1037.278    MS/MS Tol: 0.500 Da    Peaks: 94    Above Threshold: 94    Zoom to m/z for 2+    Zoom +/-: 5 Da  
 Masses:  Monoisotopic     Average    Calculate: Masses    Threshold: 0.000    Assigned: 19    Not Assigned: 75    1+, m/z: 286.151

|      | I | K* | I | I | A | P | P | E | R | Ile     | Lys     | Ile     | Ile     | Ala     | Pro     | Pro     | Glu     | Arg      |
|------|---|----|---|---|---|---|---|---|---|---------|---------|---------|---------|---------|---------|---------|---------|----------|
| Ion  | 1 | 2  | 3 | 4 | 5 | 6 | 7 | 8 | 9 | 1       | 2       | 3       | 4       | 5       | 6       | 7       | 8       | 9        |
| b    | 1 | K* | I | I | A | P | P | E | R | 114.091 | 242.186 | 355.270 | 468.354 | 539.392 | 636.444 | 733.497 | 862.540 | 1018.641 |
| b-17 | 1 | K* | I | I | A | P | P | E | R | -       | 225.160 | 338.244 | 451.328 | 522.365 | 619.418 | 716.471 | 845.513 | 1001.614 |
| b-18 | 1 | K* | I | I | A | P | P | E | R | -       | -       | -       | -       | -       | -       | -       | 844.529 | 1000.630 |
| y    | 1 | K* | I | I | A | P | P | E | R | 175.119 | 304.162 | 401.214 | 498.267 | 569.304 | 682.388 | 795.472 | 923.567 | 1036.651 |
| y-17 | 1 | K* | I | I | A | P | P | E | R | 158.092 | 287.135 | 384.188 | 481.241 | 552.278 | 665.362 | 778.446 | 906.541 | 1019.625 |
| y-18 | 1 | K* | I | I | A | P | P | E | R | -       | 286.151 | 383.204 | 480.257 | 551.294 | 664.378 | 777.462 | 905.557 | 1018.641 |
|      | 9 | 8  | 7 | 6 | 5 | 4 | 3 | 2 | 1 | Arg     | Glu     | Pro     | Pro     | Ala     | Ile     | Ile     | Lys     | Ile      |

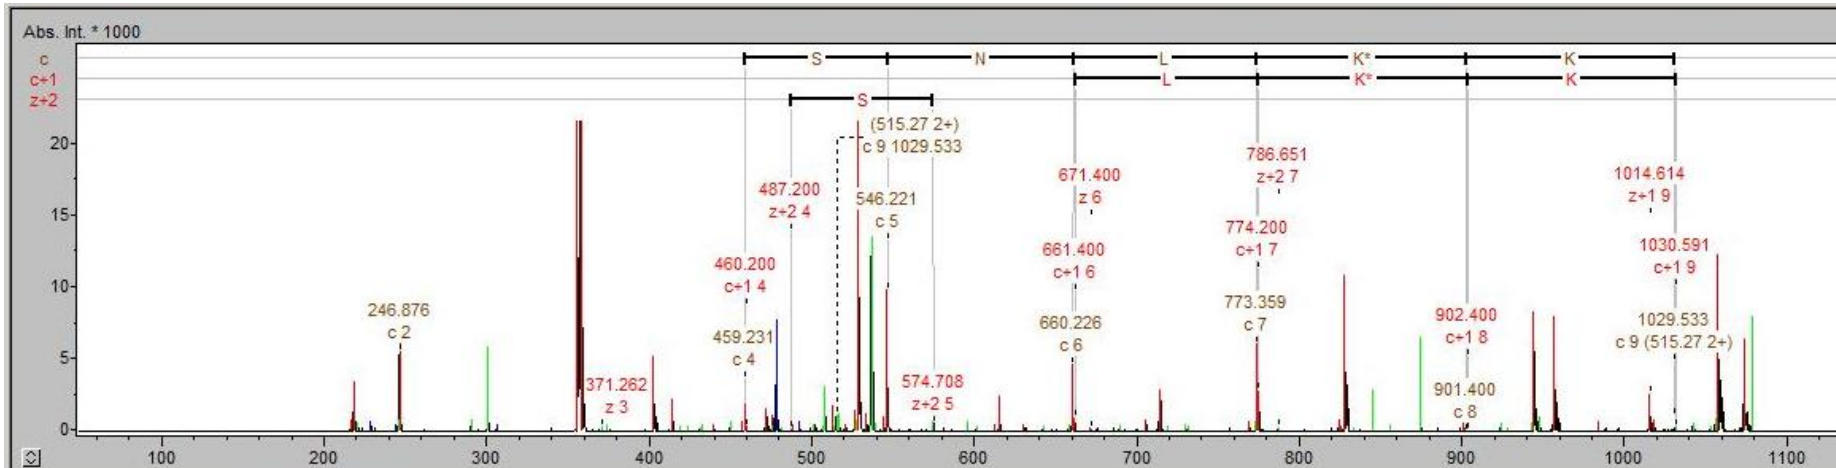

Protein View | Match Errors | MS/MS Fragments | MSMS Analysis

Sequence: TQLVSNLKK (Peptide Mods: 8: Acetyl (K))

MH+(mono): 1030.626    MH+(avg): 1031.229    MS/MS To: 0.500    Da    Peaks: 98    Above Threshold: 98    Zoom to m/z for 2+    Zoom +/-: 5    Da

Masses:  Monoisotopic     Average    Calculate: Masses    Threshold: 0.000    Assigned: 18    Not Assigned: 80    1+, m/z: 248,148

|     | T | Q | L | V | S | N | L | K  | K | Thr     | Gln     | Leu     | Val     | Ser     | Asn     | Leu     | Lys     | Lys      |
|-----|---|---|---|---|---|---|---|----|---|---------|---------|---------|---------|---------|---------|---------|---------|----------|
| Ion | 1 | 2 | 3 | 4 | 5 | 6 | 7 | 8  | 9 | 1       | 2       | 3       | 4       | 5       | 6       | 7       | 8       | 9        |
| c   | T | Q | L | V | S | N | L | K* | K | 119.082 | 247.140 | 360.224 | 459.293 | 546.325 | 660.368 | 773.452 | 901.547 | 1029.642 |
| c+1 | T | Q | L | V | S | N | L | K* | K | 120.089 | 248.148 | 361.232 | 460.300 | 547.332 | 661.375 | 774.459 | 902.554 | 1030.649 |
| z   | T | Q | L | V | S | N | L | K* | K | 130.086 | 258.181 | 371.265 | 485.308 | 572.340 | 671.409 | 784.493 | 912.551 | 1013.599 |
| z+1 | T | Q | L | V | S | N | L | K* | K | 131.094 | 259.189 | 372.273 | 486.316 | 573.348 | 672.416 | 785.501 | 913.559 | 1014.607 |
| z+2 | T | Q | L | V | S | N | L | K* | K | 132.102 | 260.197 | 373.281 | 487.324 | 574.356 | 673.424 | 786.508 | 914.567 | 1015.615 |
|     | 9 | 8 | 7 | 6 | 5 | 4 | 3 | 2  | 1 | Lys     | Lys     | Leu     | Asn     | Ser     | Val     | Leu     | Gln     | Thr      |



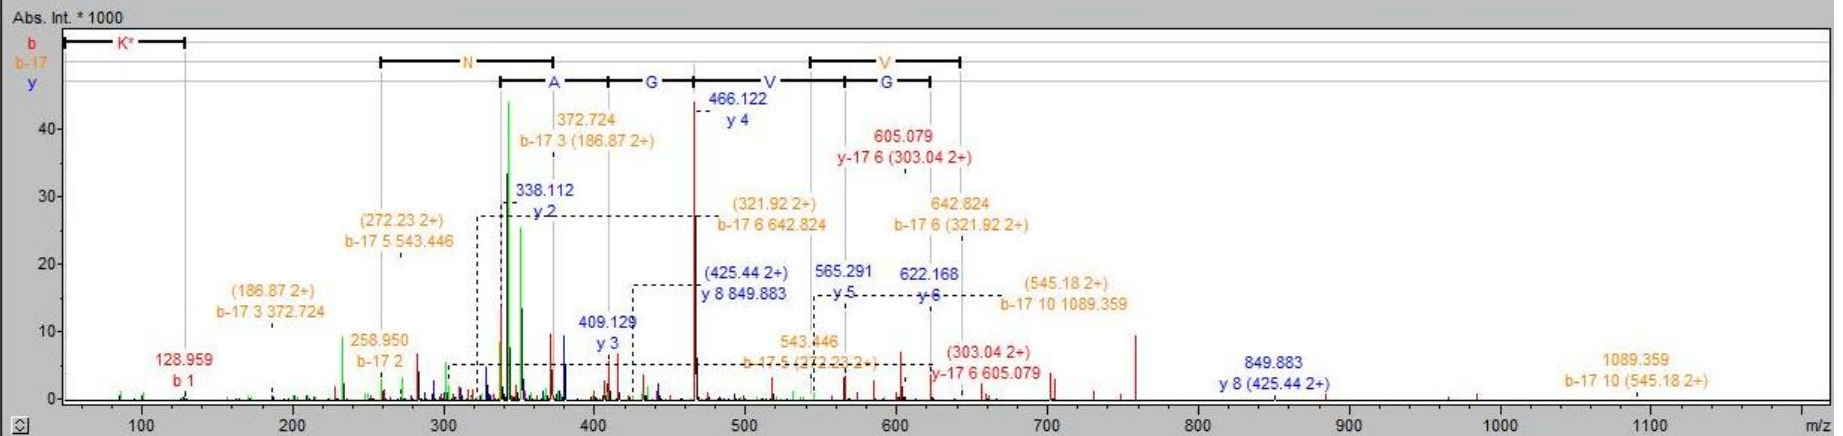

Protein View | Match Errors | MS/MS Fragments | MSMS Analysis

Sequence: **KMNLGVGAYR** (Peptide Mods: 2: Oxidation (M) 1: Acetyl (K))

MH+(mono): 1124.588    MH+(avg): 1125.325    MS/MS To: 0.500 Da    Peaks: 104    Above Threshold: 104    Zoom to m/z for 2+    Zoom +/-: 5 Da

Masses:  Monoisotopic     Average    Calculate: Masses    Threshold: 0.000    Assigned: 13    Not Assigned: 91    1+, m/z: 0.000

|      | K  | M  | N | L | G | V | G | A | Y | R  | Lys     | Met     | Asn     | Leu     | Gly     | Val     | Gly     | Ala     | Tyr     | Arg      |
|------|----|----|---|---|---|---|---|---|---|----|---------|---------|---------|---------|---------|---------|---------|---------|---------|----------|
| Ion  | 1  | 2  | 3 | 4 | 5 | 6 | 7 | 8 | 9 | 10 | 1       | 2       | 3       | 4       | 5       | 6       | 7       | 8       | 9       | 10       |
| b    | K* | M* | N | L | G | V | G | A | Y | R  | 129.102 | 276.138 | 390.181 | 503.265 | 560.286 | 659.355 | 716.376 | 787.413 | 950.476 | 1106.578 |
| b-17 | K* | M* | N | L | G | V | G | A | Y | R  | 112.076 | 259.111 | 373.154 | 486.238 | 543.260 | 642.328 | 699.349 | 770.387 | 933.450 | 1089.551 |
| b-18 | K* | M* | N | L | G | V | G | A | Y | R  | -       | -       | -       | -       | -       | -       | -       | -       | -       | -        |
| y    | K* | M* | N | L | G | V | G | A | Y | R  | 175.119 | 338.182 | 409.219 | 466.241 | 565.309 | 622.331 | 735.415 | 849.458 | 996.493 | 1124.588 |
| y-17 | K* | M* | N | L | G | V | G | A | Y | R  | 158.092 | 321.156 | 392.193 | 449.214 | 548.283 | 605.304 | 718.388 | 832.431 | 979.467 | 1107.562 |
| y-18 | K* | M* | N | L | G | V | G | A | Y | R  | -       | -       | -       | -       | -       | -       | -       | -       | -       | -        |
|      | 10 | 9  | 8 | 7 | 6 | 5 | 4 | 3 | 2 | 1  | Arg     | Tyr     | Ala     | Gly     | Val     | Gly     | Leu     | Asn     | Met     | Lys      |

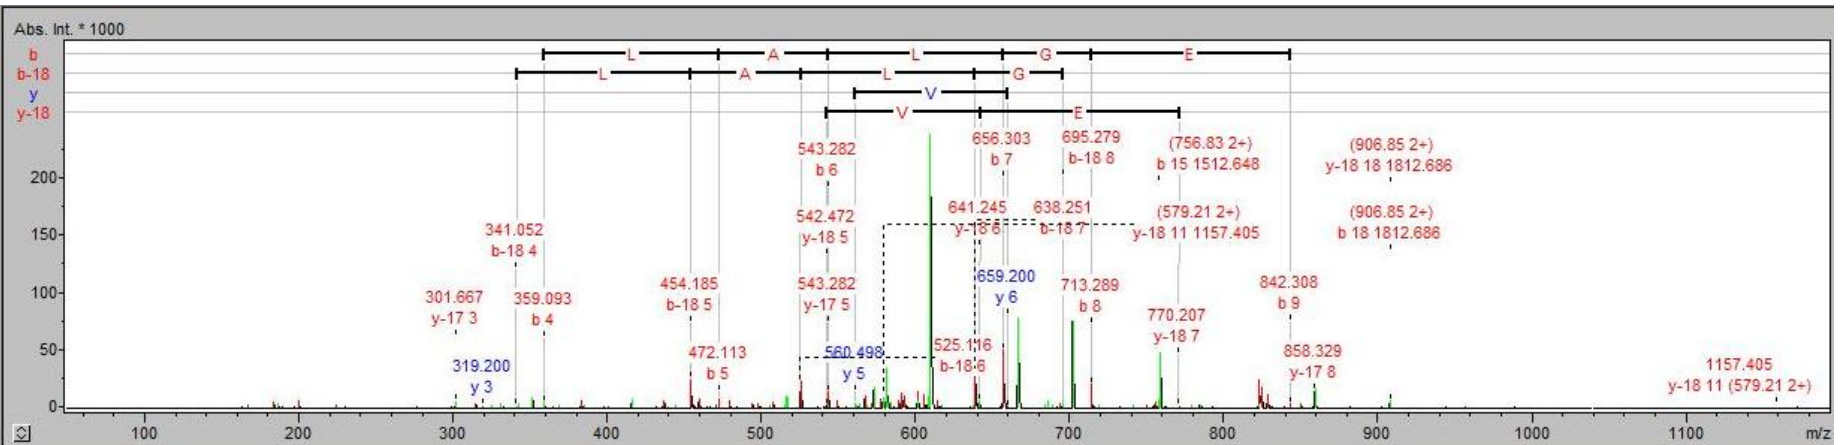

Protein View | Match Errors | MS/MS Fragments | MSMS Analysis

Sequence: ASAEALGENSEVLKSGR (Peptide Mods: 15: Acetyl (K))

MH+(mono): 1830.956    MH+(avg): 1832.001    MS/MS To: 0.500 Da    Peaks: 96    Above Threshold: 96    Zoom to m/z for 2+    Zoom +/-: 5 Da

Masses:  Monoisotopic     Average    Calculate: Masses    Threshold: 0.000    Assigned: 24    Not Assigned: 72    1+, m/z: 1288.686

|      | A  | S  | A  | E  | L  | A  | L  | G  | E  | N  | S  | E  | V  | L  | K  | S  | G  | R  | Ala     | Ser     | Ala     | Glu     | Leu     | Ala     | Leu     | Gly     | Glu     | Asn      | Ser      | Glu      | Val      |    |
|------|----|----|----|----|----|----|----|----|----|----|----|----|----|----|----|----|----|----|---------|---------|---------|---------|---------|---------|---------|---------|---------|----------|----------|----------|----------|----|
| Ion  | 1  | 2  | 3  | 4  | 5  | 6  | 7  | 8  | 9  | 10 | 11 | 12 | 13 | 14 | 15 | 16 | 17 | 18 | 1       | 2       | 3       | 4       | 5       | 6       | 7       | 8       | 9       | 10       | 11       | 12       | 13       | 14 |
| b    | A  | S  | A  | E  | L  | A  | L  | G  | E  | N  | S  | E  | V  | L  | K* | S  | G  | R  | 72.044  | 159.076 | 230.114 | 359.156 | 472.240 | 543.277 | 656.361 | 713.383 | 842.425 | 956.468  | 1043.500 | 1172.543 | 1271.611 |    |
| b-17 | A  | S  | A  | E  | L  | A  | L  | G  | E  | N  | S  | E  | V  | L  | K* | S  | G  | R  | -       | -       | -       | -       | -       | -       | -       | -       | -       | 939.442  | 1026.474 | 1155.516 | 1254.585 |    |
| b-18 | A  | S  | A  | E  | L  | A  | L  | G  | E  | N  | S  | E  | V  | L  | K* | S  | G  | R  | -       | 141.066 | 212.103 | 341.146 | 454.230 | 525.267 | 638.351 | 695.372 | 824.415 | 938.458  | 1025.490 | 1154.532 | 1253.601 |    |
| y    | A  | S  | A  | E  | L  | A  | L  | G  | E  | N  | S  | E  | V  | L  | K* | S  | G  | R  | 175.119 | 232.140 | 319.172 | 447.267 | 560.351 | 659.420 | 788.462 | 875.495 | 989.537 | 1118.580 | 1175.601 | 1288.686 | 1359.723 |    |
| y-17 | A  | S  | A  | E  | L  | A  | L  | G  | E  | N  | S  | E  | V  | L  | K* | S  | G  | R  | 158.092 | 215.114 | 302.146 | 430.241 | 543.325 | 642.393 | 771.436 | 858.468 | 972.511 | 1101.553 | 1158.575 | 1271.659 | 1342.696 |    |
| y-18 | A  | S  | A  | E  | L  | A  | L  | G  | E  | N  | S  | E  | V  | L  | K* | S  | G  | R  | -       | -       | 301.162 | 429.257 | 542.341 | 641.409 | 770.452 | 857.484 | 971.527 | 1100.569 | 1157.591 | 1270.675 | 1341.712 |    |
|      | 18 | 17 | 16 | 15 | 14 | 13 | 12 | 11 | 10 | 9  | 8  | 7  | 6  | 5  | 4  | 3  | 2  | 1  | Arg     | Gly     | Ser     | Lys     | Leu     | Val     | Glu     | Ser     | Asn     | Glu      | Gly      | Leu      | Ala      |    |



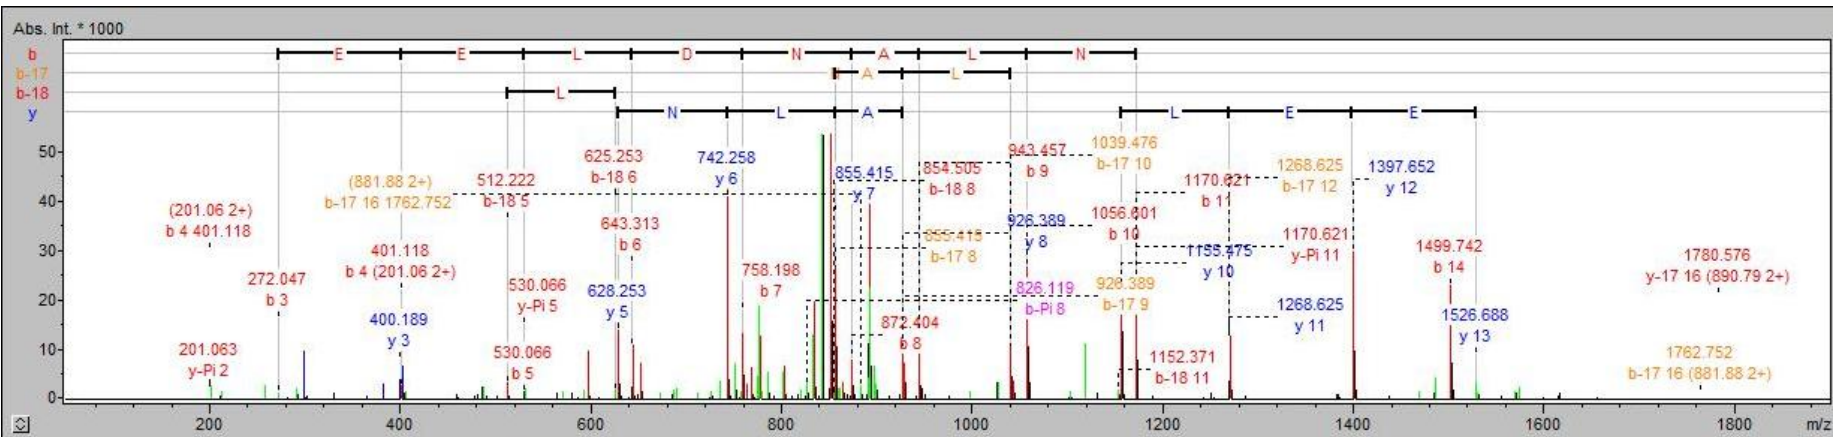

Protein View | Match Errors | MS/MS Fragments | MSMS Analysis

Sequence: AISEELDNDITSL (Peptide Mods: 15: Phospho (ST))

MH+(mono): 1797.815    MH+(avg): 1798.817    MS/MS Tol: 0.500 Da    Peaks: 79    Above Threshold: 79    Zoom to m/z for 2+    Zoom +/-: 5 Da

Masses:  Monoisotopic     Average    Calculate: Masses    Threshold: 0.000    Assigned: 33    Not Assigned: 46    1+, m/z: 0.000

|      | A  | I  | S  | E  | E  | L  | D  | N | A | L  | N  | D  | I  | T  | S  | L  | Ala     | Ile     | Ser     | Glu     | Glu     | Leu     | Asp     | Asn     | Ala      | Leu      | Asn      | Asp      | Ile      | Thr      |
|------|----|----|----|----|----|----|----|---|---|----|----|----|----|----|----|----|---------|---------|---------|---------|---------|---------|---------|---------|----------|----------|----------|----------|----------|----------|
| Ion  | 1  | 2  | 3  | 4  | 5  | 6  | 7  | 8 | 9 | 10 | 11 | 12 | 13 | 14 | 15 | 16 | 1       | 2       | 3       | 4       | 5       | 6       | 7       | 8       | 9        | 10       | 11       | 12       | 13       | 14       |
| b    | A  | I  | S  | E  | E  | L  | D  | N | A | L  | N  | D  | I  | T  | S* | L  | 72.044  | 185.128 | 272.160 | 401.203 | 530.246 | 643.330 | 758.357 | 872.400 | 943.437  | 1056.521 | 1170.564 | 1285.591 | 1398.675 | 1499.742 |
| b-17 | A  | I  | S  | E  | E  | L  | D  | N | A | L  | N  | D  | I  | T  | S* | L  | -       | -       | -       | -       | -       | -       | -       | 855.373 | 926.410  | 1039.494 | 1153.537 | 1268.564 | 1381.648 | 1482.681 |
| b-18 | A  | I  | S  | E  | E  | L  | D  | N | A | L  | N  | D  | I  | T  | S* | L  | -       | -       | 254.150 | 383.193 | 512.235 | 625.319 | 740.346 | 854.389 | 925.426  | 1038.510 | 1152.553 | 1267.580 | 1380.664 | 1481.697 |
| b-Pi | A  | I  | S  | E  | E  | L  | D  | N | A | L  | N  | D  | I  | T  | S* | L  | 25.933  | -       | 226.049 | 355.091 | 484.134 | 597.218 | 712.245 | 826.288 | 897.325  | 1010.409 | 1124.452 | 1239.479 | 1352.563 | 1453.596 |
| y    | A  | I  | S  | E  | E  | L  | D  | N | A | L  | N  | D  | I  | T  | S* | L  | 132.102 | 299.100 | 400.148 | 513.232 | 628.259 | 742.302 | 855.388 | 926.423 | 1040.466 | 1155.493 | 1268.577 | 1397.620 | 1528.662 | 1613.699 |
| y-17 | A  | I  | S  | E  | E  | L  | D  | N | A | L  | N  | D  | I  | T  | S* | L  | -       | -       | -       | -       | -       | 725.275 | 838.359 | 909.397 | 1023.439 | 1138.466 | 1251.550 | 1380.593 | 1509.636 | 1596.673 |
| y-18 | A  | I  | S  | E  | E  | L  | D  | N | A | L  | N  | D  | I  | T  | S* | L  | -       | 281.090 | 382.137 | 495.221 | 610.248 | 724.291 | 837.375 | 908.412 | 1022.455 | 1137.482 | 1250.566 | 1379.609 | 1508.652 | 1595.689 |
| y-Pi | A  | I  | S  | E  | E  | L  | D  | N | A | L  | N  | D  | I  | T  | S* | L  | -       | 201.123 | 302.171 | 415.255 | 530.282 | 644.325 | 757.409 | 828.446 | 942.489  | 1057.516 | 1170.600 | 1299.643 | 1428.685 | 1515.722 |
|      | 16 | 15 | 14 | 13 | 12 | 11 | 10 | 9 | 8 | 7  | 6  | 5  | 4  | 3  | 2  | 1  | Leu     | Ser     | Thr     | Ile     | Asp     | Asn     | Leu     | Ala     | Asn      | Asp      | Leu      | Glu      | Glu      | Ser      |

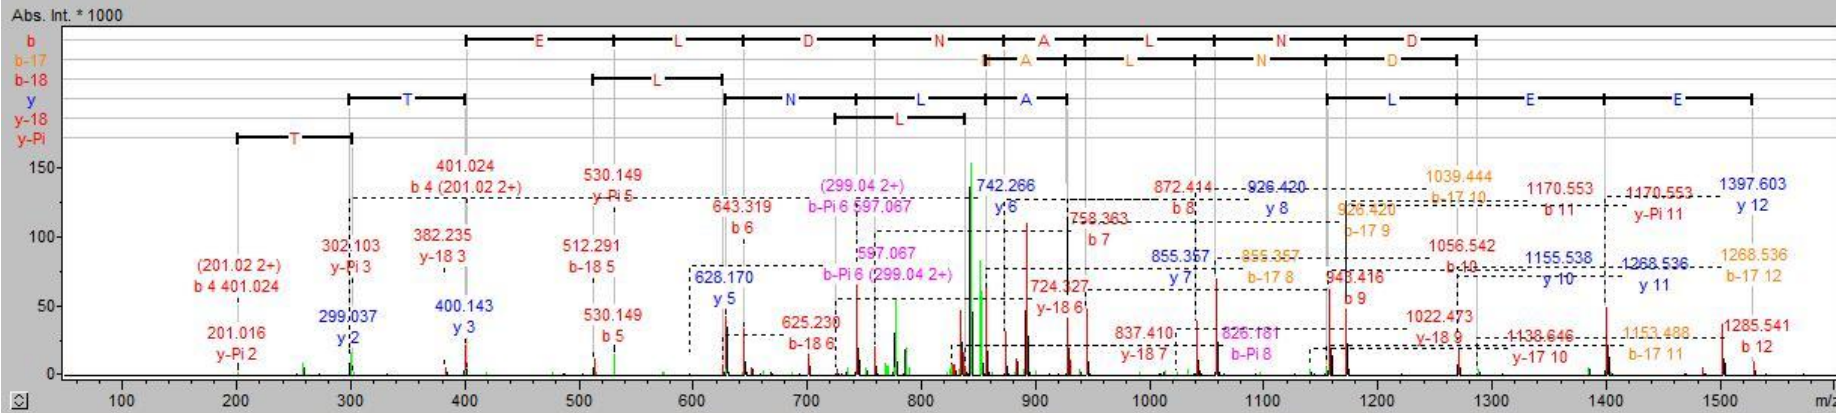

Protein View | Match Errors | MS/MS Fragments | MSMS Analysis

Sequence: AISEELDNALNDITSL (Peptide Mods: 15: Phospho (ST))

MH+(mono): 1797.815    MH+(avg): 1798.817    MS/MS To: 0.500    Da    Peaks: 82    Above Threshold: 82    Zoom to m/z for 2+    Zoom +/-: 5    Da

Masses:  Monoisotopic     Average    Calculate: Masses    Threshold: 0.000    Assigned: 41    Not Assigned: 41    1+, m/z: 0.000

|      | A  | I  | S  | E  | E  | L  | D  | N | A | L  | N  | D  | I  | T  | S  | L  | Ala     | Ile     | Ser     | Glu     | Glu     | Leu     | Asp     | Asn     | Ala      | Leu      | Asn      | Asp      | Ile      | Thr   |
|------|----|----|----|----|----|----|----|---|---|----|----|----|----|----|----|----|---------|---------|---------|---------|---------|---------|---------|---------|----------|----------|----------|----------|----------|-------|
| Ion  | 1  | 2  | 3  | 4  | 5  | 6  | 7  | 8 | 9 | 10 | 11 | 12 | 13 | 14 | 15 | 16 | 1       | 2       | 3       | 4       | 5       | 6       | 7       | 8       | 9        | 10       | 11       | 12       | 13       | 14    |
| b    | A  | I  | S  | E  | E  | L  | D  | N | A | L  | N  | D  | I  | T  | S* | L  | 72.044  | 185.128 | 272.160 | 401.203 | 530.246 | 643.330 | 758.357 | 872.400 | 943.437  | 1056.521 | 1170.564 | 1285.591 | 1398.675 | 1499. |
| b-17 | A  | I  | S  | E  | E  | L  | D  | N | A | L  | N  | D  | I  | T  | S* | L  | -       | -       | -       | -       | -       | -       | -       | 855.373 | 926.410  | 1039.494 | 1153.537 | 1268.564 | 1381.648 | 1482. |
| b-18 | A  | I  | S  | E  | E  | L  | D  | N | A | L  | N  | D  | I  | T  | S* | L  | -       | -       | 254.150 | 383.193 | 512.235 | 625.319 | 740.346 | 854.389 | 925.426  | 1038.510 | 1152.553 | 1267.580 | 1380.664 | 1481. |
| b-Pi | A  | I  | S  | E  | E  | L  | D  | N | A | L  | N  | D  | I  | T  | S* | L  | 25.933  | -       | 226.049 | 355.091 | 484.134 | 597.218 | 712.245 | 826.288 | 897.325  | 1010.409 | 1124.452 | 1239.479 | 1352.563 | 1453. |
| y    | A  | I  | S  | E  | E  | L  | D  | N | A | L  | N  | D  | I  | T  | S* | L  | 132.102 | 299.100 | 400.148 | 513.232 | 628.259 | 742.302 | 855.386 | 926.423 | 1040.466 | 1155.493 | 1268.577 | 1397.620 | 1526.662 | 1613. |
| y-17 | A  | I  | S  | E  | E  | L  | D  | N | A | L  | N  | D  | I  | T  | S* | L  | -       | -       | -       | -       | -       | 725.275 | 838.359 | 909.397 | 1023.439 | 1138.466 | 1251.550 | 1380.593 | 1509.636 | 1596. |
| y-18 | A  | I  | S  | E  | E  | L  | D  | N | A | L  | N  | D  | I  | T  | S* | L  | -       | 281.090 | 382.137 | 495.221 | 610.248 | 724.291 | 837.375 | 908.412 | 1022.455 | 1137.482 | 1250.566 | 1379.609 | 1508.652 | 1595. |
| y-Pi | A  | I  | S  | E  | E  | L  | D  | N | A | L  | N  | D  | I  | T  | S* | L  | -       | 201.123 | 302.171 | 415.255 | 530.282 | 644.325 | 757.409 | 828.446 | 942.489  | 1057.516 | 1170.600 | 1299.643 | 1428.685 | 1515. |
|      | 16 | 15 | 14 | 13 | 12 | 11 | 10 | 9 | 8 | 7  | 6  | 5  | 4  | 3  | 2  | 1  | Leu     | Ser     | Thr     | Ile     | Asp     | Asn     | Leu     | Ala     | Asn      | Asp      | Leu      | Glu      | Glu      | Ser   |



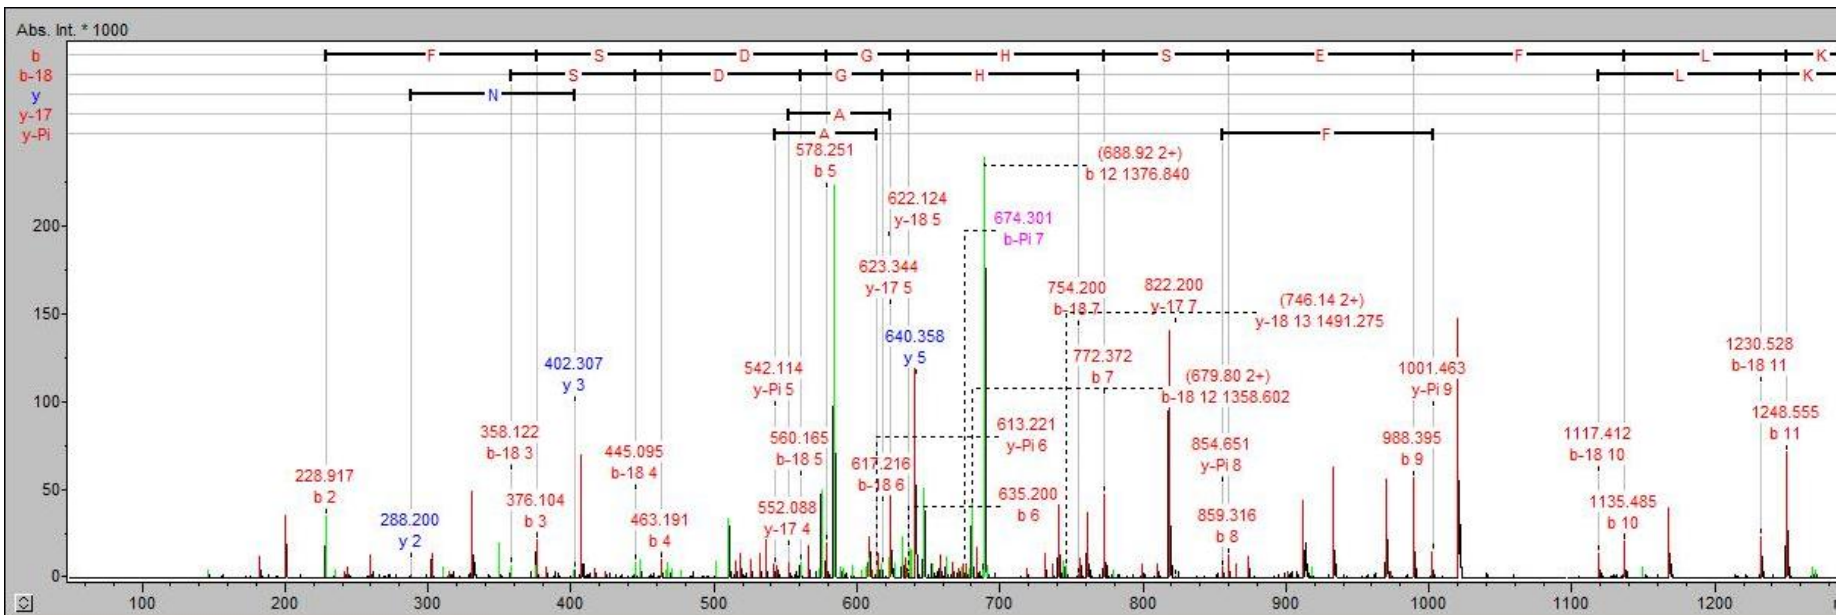

Protein View | Match Errors | MS/MS Fragments | MSMS Analysis

Sequence: **DLFSDGHSEFLKAASNLK** (Peptide Mods: 15: Phospho (ST))

MH+(mono): 2086.959    MH+(avg): 2088.155    MS/MS Tol: 0.500 Da    Peaks: 119    Above Threshold: 119    Zoom to m/z for 2+    Zoom +/-: 5 Da

Masses:  Monoisotopic     Average    Calculate: Masses    Threshold: 0.000    Assigned: 32    Not Assigned: 87    1+, m/z: 741.437

|      | D  | L  | F  | S  | D  | G  | H  | S  | E  | F  | L  | K  | A  | A  | S  | N  | L  | R  | Asp     | Leu     | Phe     | Ser     | Asp     | Gly     | His     | Ser     | Glu      | Phe      | Leu      | Lys      | Ala      |
|------|----|----|----|----|----|----|----|----|----|----|----|----|----|----|----|----|----|----|---------|---------|---------|---------|---------|---------|---------|---------|----------|----------|----------|----------|----------|
| Ion  | 1  | 2  | 3  | 4  | 5  | 6  | 7  | 8  | 9  | 10 | 11 | 12 | 13 | 14 | 15 | 16 | 17 | 18 | 1       | 2       | 3       | 4       | 5       | 6       | 7       | 8       | 9        | 10       | 11       | 12       | 13       |
| b    | D  | L  | F  | S  | D  | G  | H  | S  | E  | F  | L  | K  | A  | A  | S* | N  | L  | R  | 116.034 | 229.118 | 376.187 | 463.219 | 578.246 | 635.267 | 772.326 | 859.358 | 988.401  | 1135.469 | 1248.553 | 1376.648 | 1447.685 |
| b-17 | D  | L  | F  | S  | D  | G  | H  | S  | E  | F  | L  | K  | A  | A  | S* | N  | L  | R  | -       | -       | -       | -       | -       | -       | -       | -       | -        | -        | -        | 1359.622 | 1430.659 |
| b-18 | D  | L  | F  | S  | D  | G  | H  | S  | E  | F  | L  | K  | A  | A  | S* | N  | L  | R  | 98.024  | 211.108 | 358.176 | 445.208 | 560.235 | 617.257 | 754.315 | 841.348 | 970.390  | 1117.459 | 1230.543 | 1358.638 | 1429.675 |
| b-Pi | D  | L  | F  | S  | D  | G  | H  | S  | E  | F  | L  | K  | A  | A  | S* | N  | L  | R  | -       | -       | -       | 365.242 | 480.269 | 537.290 | 674.349 | 761.381 | 890.424  | 1037.492 | 1150.576 | 1278.671 | 1349.708 |
| y    | D  | L  | F  | S  | D  | G  | H  | S  | E  | F  | L  | K  | A  | A  | S* | N  | L  | R  | 175.119 | 288.203 | 402.246 | 569.244 | 640.281 | 711.319 | 839.413 | 952.498 | 1099.566 | 1228.609 | 1315.641 | 1452.700 | 1509.721 |
| y-17 | D  | L  | F  | S  | D  | G  | H  | S  | E  | F  | L  | K  | A  | A  | S* | N  | L  | R  | 158.092 | 271.176 | 385.219 | 552.218 | 623.255 | 694.292 | 822.387 | 935.471 | 1082.539 | 1211.582 | 1298.614 | 1435.673 | 1492.694 |
| y-18 | D  | L  | F  | S  | D  | G  | H  | S  | E  | F  | L  | K  | A  | A  | S* | N  | L  | R  | -       | -       | -       | 551.234 | 622.271 | 693.308 | 821.403 | 934.487 | 1081.555 | 1210.598 | 1297.630 | 1434.689 | 1491.710 |
| y-Pi | D  | L  | F  | S  | D  | G  | H  | S  | E  | F  | L  | K  | A  | A  | S* | N  | L  | R  | -       | -       | -       | 471.267 | 542.305 | 613.342 | 741.437 | 854.521 | 1001.589 | 1130.632 | 1217.664 | 1354.723 | 1411.744 |
|      | 18 | 17 | 16 | 15 | 14 | 13 | 12 | 11 | 10 | 9  | 8  | 7  | 6  | 5  | 4  | 3  | 2  | 1  | Arg     | Leu     | Asn     | Ser     | Ala     | Ala     | Lys     | Leu     | Phe      | Glu      | Ser      | His      | Gly      |

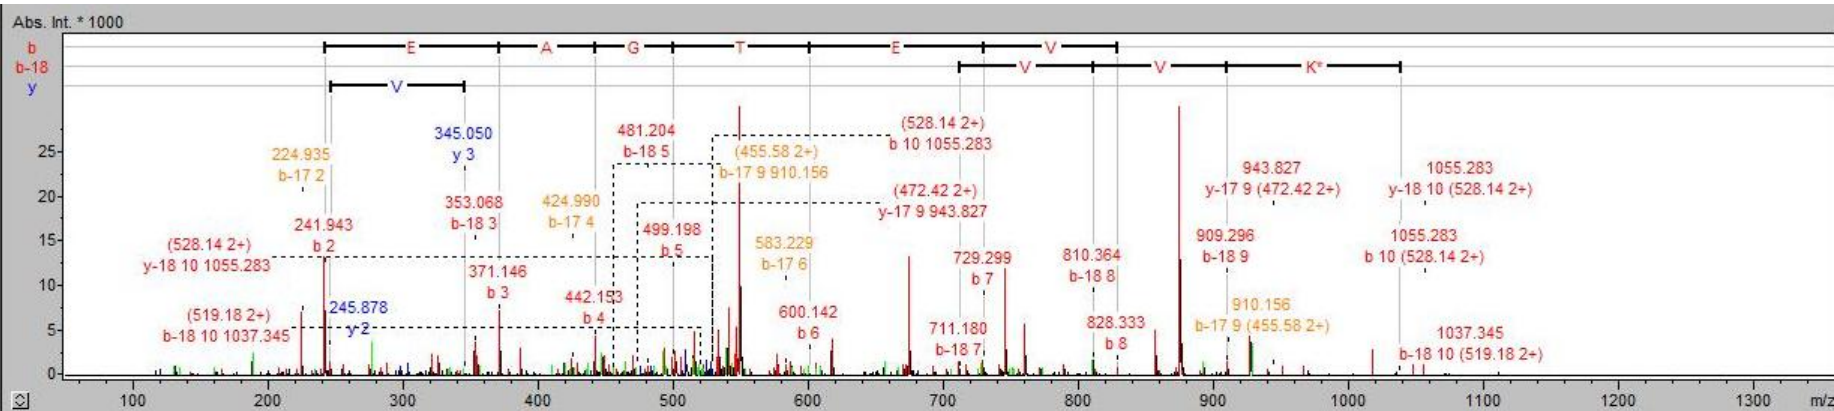

Protein View | Match Errors | MS/MS Fragments | MSMS Analysis

Sequence: **IQEAGTEVVV** (Peptide Mods: 10: Acetyl (K))

MH+(mono): 1073.584    MH+(avg): 1074.207    MS/MS To: 0.500 Da    Peaks: 138    Above Threshold: 138    Zoom to m/z for 2+    Zoom +/-: 5 Da

Masses:  Monoisotopic     Average    Calculate: Masses    Threshold: 0.000    Assigned: 22    Not Assigned: 116    1+, m/z: 0.000

|      | I | Q | E | A | G | T | E | V | V | K  | Ile     | Gln     | Glu     | Ala     | Gly     | Thr     | Glu     | Val     | Val     | Lys      |
|------|---|---|---|---|---|---|---|---|---|----|---------|---------|---------|---------|---------|---------|---------|---------|---------|----------|
| Ion  | 1 | 2 | 3 | 4 | 5 | 6 | 7 | 8 | 9 | 10 | 1       | 2       | 3       | 4       | 5       | 6       | 7       | 8       | 9       | 10       |
| b    | I | Q | E | A | G | T | E | V | V | K* | 114.091 | 242.150 | 371.193 | 442.230 | 499.251 | 600.299 | 729.341 | 828.410 | 927.478 | 1055.573 |
| b-17 | I | Q | E | A | G | T | E | V | V | K* | -       | 225.123 | 354.166 | 425.203 | 482.225 | 583.272 | 712.315 | 811.383 | 910.452 | 1038.547 |
| b-18 | I | Q | E | A | G | T | E | V | V | K* | -       | -       | 353.182 | 424.219 | 481.241 | 582.288 | 711.331 | 810.399 | 909.468 | 1037.563 |
| y    | I | Q | E | A | G | T | E | V | V | K* | 147.113 | 246.181 | 345.250 | 474.292 | 575.340 | 632.361 | 703.398 | 832.441 | 960.500 | 1073.584 |
| y-17 | I | Q | E | A | G | T | E | V | V | K* | 130.086 | 229.155 | 328.223 | 457.266 | 558.313 | 615.335 | 686.372 | 815.415 | 943.473 | 1056.557 |
| y-18 | I | Q | E | A | G | T | E | V | V | K* | -       | -       | -       | 456.282 | 557.329 | 614.351 | 685.388 | 814.431 | 942.489 | 1055.573 |
| 10   | 9 | 8 | 7 | 6 | 5 | 4 | 3 | 2 | 1 |    | Lys     | Val     | Val     | Glu     | Thr     | Gly     | Ala     | Glu     | Gln     | Ile      |



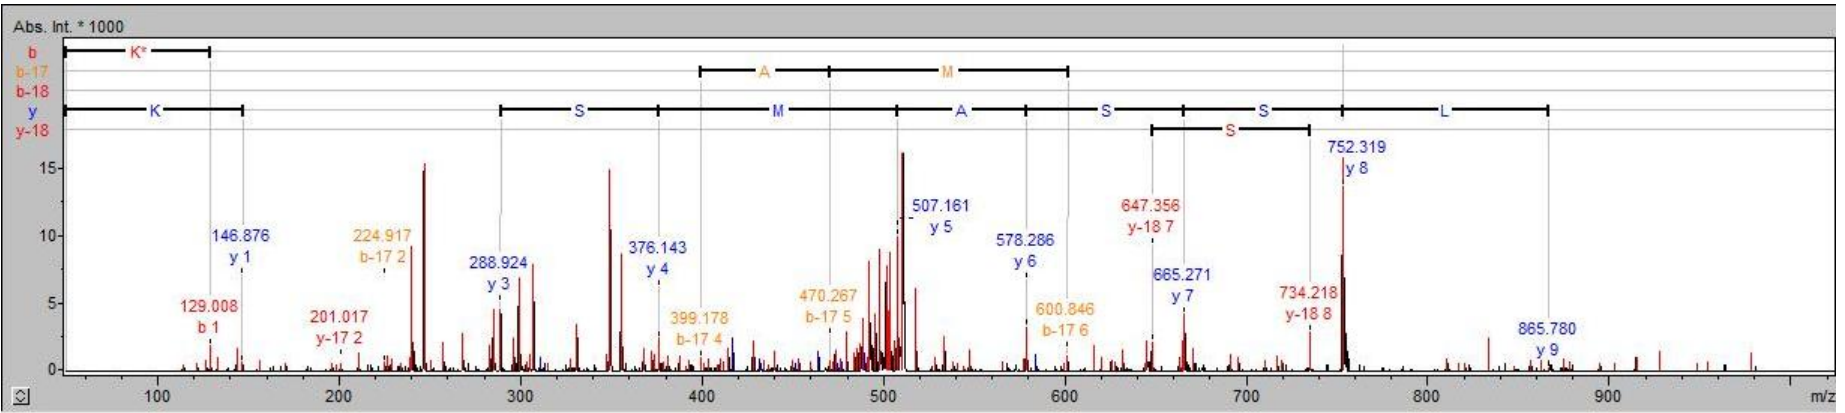

Protein View | Match Errors | MS/MS Fragments | MSMS Analysis

Sequence: KLSSAMSAAK (Peptide Mods: 1: Acetyl (K))

MH+(mono): 993.540    MH+(avg): 994.190    MS/MS To: 0.500    Da    Peaks: 128    Above Threshold: 128    Zoom to m/z for 2+    Zoom +/-: 5    Da

Masses:  Monoisotopic     Average    Calculate: Masses    Threshold: 0.000    Assigned: 21    Not Assigned: 107    1+, m/z: 0.000

|      | K  | L | S | S | A | M | S | A | A | K  | Lys     | Leu     | Ser     | Ser     | Ala     | Met     | Ser     | Ala     | Ala     | Lys     |
|------|----|---|---|---|---|---|---|---|---|----|---------|---------|---------|---------|---------|---------|---------|---------|---------|---------|
| Ion  | 1  | 2 | 3 | 4 | 5 | 6 | 7 | 8 | 9 | 10 | 1       | 2       | 3       | 4       | 5       | 6       | 7       | 8       | 9       | 10      |
| b    | K* | L | S | S | A | M | S | A | A | K  | 129.102 | 242.186 | 329.218 | 416.250 | 487.287 | 618.328 | 705.360 | 776.397 | 847.434 | 975.529 |
| b-17 | K* | L | S | S | A | M | S | A | A | K  | 112.076 | 225.160 | 312.192 | 399.224 | 470.261 | 601.301 | 688.333 | 759.371 | 830.408 | 958.503 |
| b-18 | K* | L | S | S | A | M | S | A | A | K  | -       | -       | 311.208 | 398.240 | 469.277 | 600.317 | 687.349 | 758.387 | 829.424 | 957.519 |
| y    | K* | L | S | S | A | M | S | A | A | K  | 147.113 | 218.150 | 289.187 | 376.219 | 507.260 | 578.297 | 665.329 | 752.361 | 865.445 | 993.540 |
| y-17 | K* | L | S | S | A | M | S | A | A | K  | 130.086 | 201.123 | 272.160 | 359.193 | 490.233 | 561.270 | 648.302 | 735.334 | 848.418 | 976.513 |
| y-18 | K* | L | S | S | A | M | S | A | A | K  | -       | -       | -       | 358.208 | 489.249 | 560.286 | 647.318 | 734.350 | 847.434 | 975.529 |
|      | 10 | 9 | 8 | 7 | 6 | 5 | 4 | 3 | 2 | 1  | Lys     | Ala     | Ala     | Ser     | Met     | Ala     | Ser     | Ser     | Leu     | Lys     |

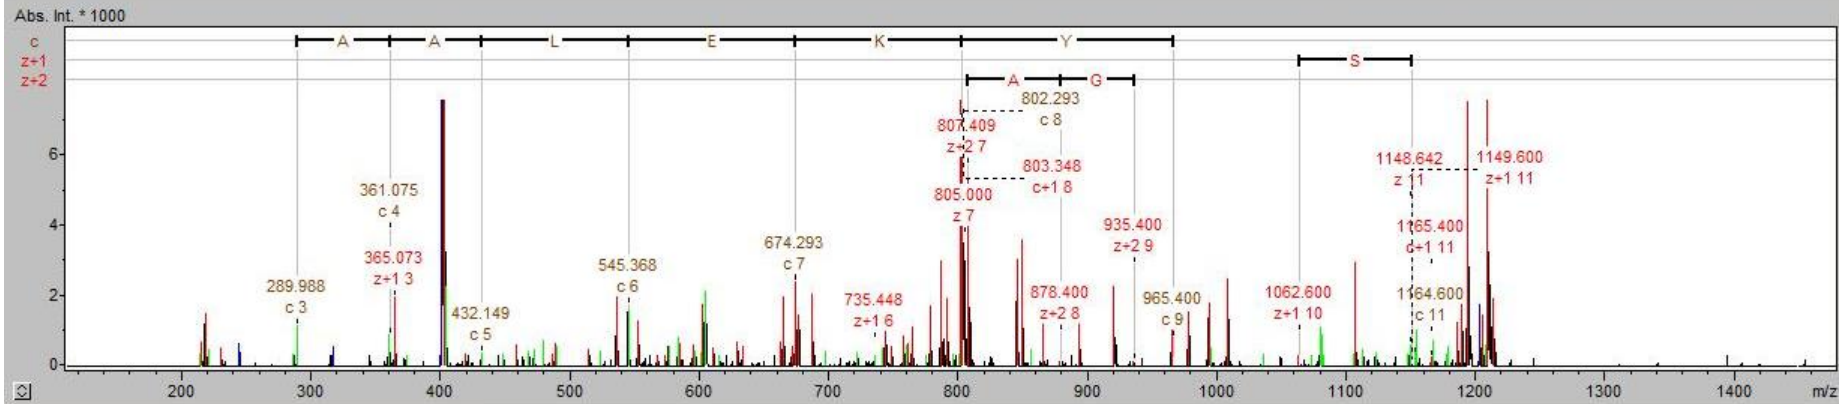

Protein View | Match Errors | MS/MS Fragments | MSMS Analysis

Sequence: SQGAALEKYAK (Peptide Mods: 11: Acetyl (K))

MH+(mono): 1165.621    MH+(avg): 1166.306    MS/MS To: 0.500    Da    Peaks: 113    Above Threshold: 113    Zoom to m/z for 2+    Zoom +/-: 5    Da

Masses:  Monoisotopic     Average    Calculate: Masses    Threshold: 0.000    Assigned: 19    Not Assigned: 94    1+, m/z: 734.408

|     | S  | Q  | G | A | A | L | E | K | Y | A  | K  | Ser     | Gln     | Gly     | Ala     | Ala     | Leu     | Glu     | Lys     | Tyr     | Ala      | Lys      |
|-----|----|----|---|---|---|---|---|---|---|----|----|---------|---------|---------|---------|---------|---------|---------|---------|---------|----------|----------|
| Ion | 1  | 2  | 3 | 4 | 5 | 6 | 7 | 8 | 9 | 10 | 11 | 1       | 2       | 3       | 4       | 5       | 6       | 7       | 8       | 9       | 10       | 11       |
| c   | S  | Q  | G | A | A | L | E | K | Y | A  | K* | 105.066 | 233.124 | 290.146 | 361.183 | 432.220 | 545.304 | 674.347 | 802.442 | 965.505 | 1036.542 | 1164.637 |
| c+1 | S  | Q  | G | A | A | L | E | K | Y | A  | K* | 106.074 | 234.132 | 291.154 | 362.191 | 433.228 | 546.312 | 675.355 | 803.450 | 966.513 | 1037.550 | 1165.645 |
| z   | S  | Q  | G | A | A | L | E | K | Y | A  | K* | 130.086 | 201.123 | 364.187 | 492.282 | 621.324 | 734.408 | 805.445 | 876.483 | 933.504 | 1061.563 | 1148.595 |
| z+1 | S  | Q  | G | A | A | L | E | K | Y | A  | K* | 131.094 | 202.131 | 365.195 | 493.289 | 622.332 | 735.416 | 806.453 | 877.490 | 934.512 | 1062.570 | 1149.602 |
| z+2 | S  | Q  | G | A | A | L | E | K | Y | A  | K* | 132.102 | 203.139 | 366.202 | 494.297 | 623.340 | 736.424 | 807.461 | 878.498 | 935.520 | 1063.578 | 1150.610 |
|     | 11 | 10 | 9 | 8 | 7 | 6 | 5 | 4 | 3 | 2  | 1  | Lys     | Ala     | Tyr     | Lys     | Glu     | Leu     | Ala     | Ala     | Gly     | Gln      | Ser      |



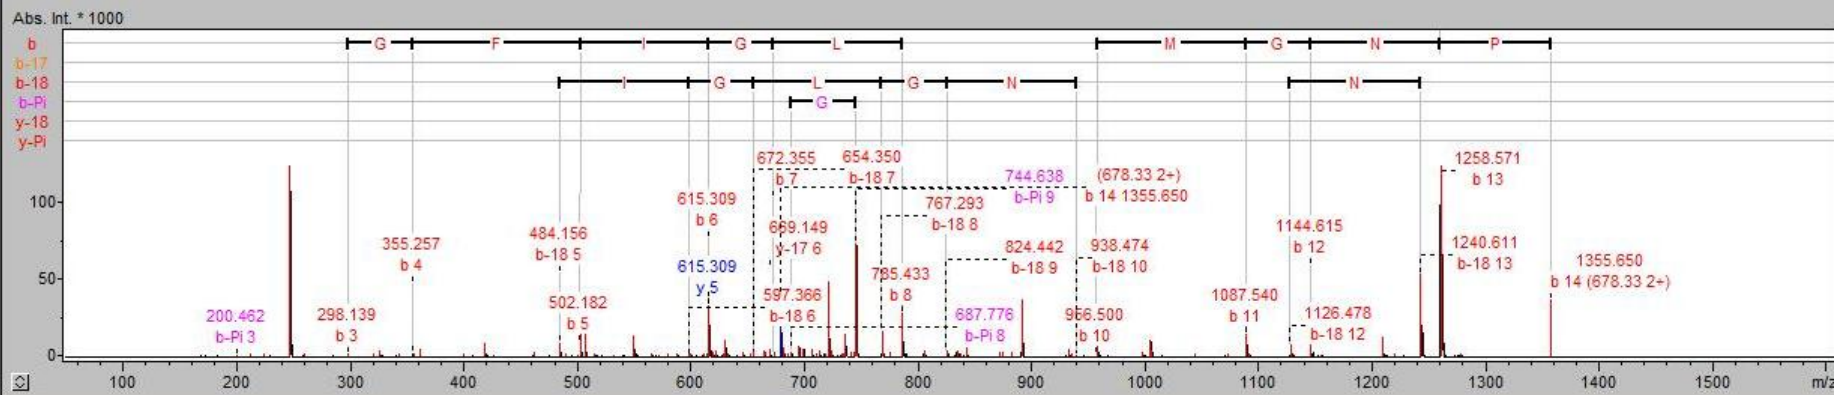

Protein View | Match Errors | MS/MS Fragments | MSMS Analysis

Sequence: TPVGFILGNMGNPMAKNIK (Peptide Mods: 17: Acetyl (K) 21: Acetyl (K))

MH+(mono): 2172.167 MH+(avg): 2173.627 MS/MS To: 0.500 Da Peaks: 97 Above Threshold: 97 Zoom to m/z for 2+ Zoom +/-: 5 Da

Masses:  Monoisotopic  Average Calculate: Masses Threshold: 0.000 Assigned: 73 Not Assigned: 24 1+, m/z: 0.000

|      | T  | P  | V  | G  | F  | I  | G  | L  | G  | N  | M  | G  | N  | P  | M  | A  | K  | N  | L  | I  | K  | Thr     | Pro     | Val     | Gly     | Phe     | Ile     | Gly     | Leu     | Gly      | Asn      | Met      | Gly      |    |  |
|------|----|----|----|----|----|----|----|----|----|----|----|----|----|----|----|----|----|----|----|----|----|---------|---------|---------|---------|---------|---------|---------|---------|----------|----------|----------|----------|----|--|
| Ion  | 1  | 2  | 3  | 4  | 5  | 6  | 7  | 8  | 9  | 10 | 11 | 12 | 13 | 14 | 15 | 16 | 17 | 18 | 19 | 20 | 21 | 1       | 2       | 3       | 4       | 5       | 6       | 7       | 8       | 9        | 10       | 11       | 12       | 13 |  |
| b    | T  | P  | V  | G  | F  | I  | G  | L  | G  | N  | M  | G  | N  | P  | M  | A  | K* | N  | L  | I  | K* | 102.055 | 199.108 | 298.176 | 355.198 | 502.286 | 615.350 | 672.372 | 785.456 | 842.477  | 956.520  | 1087.560 | 1144.582 | 1: |  |
| b-17 | T  | P  | V  | G  | F  | I  | G  | L  | G  | N  | M  | G  | N  | P  | M  | A  | K* | N  | L  | I  | K* | -       | -       | -       | -       | -       | -       | -       | -       | -        | 939.493  | 1070.534 | 1127.555 | 1: |  |
| b-18 | T  | P  | V  | G  | F  | I  | G  | L  | G  | N  | M  | G  | N  | P  | M  | A  | K* | N  | L  | I  | K* | 84.044  | 181.097 | 280.166 | 337.187 | 484.255 | 597.340 | 654.361 | 767.445 | 824.466  | 938.509  | 1069.550 | 1126.571 | 1: |  |
| b-Pi | T  | P  | V  | G  | F  | I  | G  | L  | G  | N  | M  | G  | N  | P  | M  | A  | K* | N  | L  | I  | K* | 4.078   | 101.131 | 200.199 | 257.221 | 404.289 | 517.373 | 574.395 | 687.479 | 744.500  | 858.543  | 989.584  | 1046.605 | 1: |  |
| y    | T  | P  | V  | G  | F  | I  | G  | L  | G  | N  | M  | G  | N  | P  | M  | A  | K* | N  | L  | I  | K* | 147.113 | 260.197 | 373.281 | 487.324 | 615.419 | 686.456 | 817.496 | 914.549 | 1028.592 | 1085.614 | 1216.654 | 1330.697 | 1: |  |
| y-17 | T  | P  | V  | G  | F  | I  | G  | L  | G  | N  | M  | G  | N  | P  | M  | A  | K* | N  | L  | I  | K* | 130.086 | 243.170 | 356.254 | 470.297 | 598.392 | 689.429 | 800.470 | 897.523 | 1011.566 | 1068.587 | 1199.628 | 1313.670 | 1: |  |
| y-18 | T  | P  | V  | G  | F  | I  | G  | L  | G  | N  | M  | G  | N  | P  | M  | A  | K* | N  | L  | I  | K* | -       | -       | -       | -       | -       | -       | -       | -       | -        | -        | -        | -        | -  |  |
| y-Pi | T  | P  | V  | G  | F  | I  | G  | L  | G  | N  | M  | G  | N  | P  | M  | A  | K* | N  | L  | I  | K* | -       | -       | -       | -       | -       | -       | -       | -       | -        | -        | -        | -        | -  |  |
|      | 21 | 20 | 19 | 18 | 17 | 16 | 15 | 14 | 13 | 12 | 11 | 10 | 9  | 8  | 7  | 6  | 5  | 4  | 3  | 2  | 1  | Lys     | Ile     | Leu     | Asn     | Lys     | Ala     | Met     | Pro     | Asn      | Gly      | Met      | Asn      |    |  |

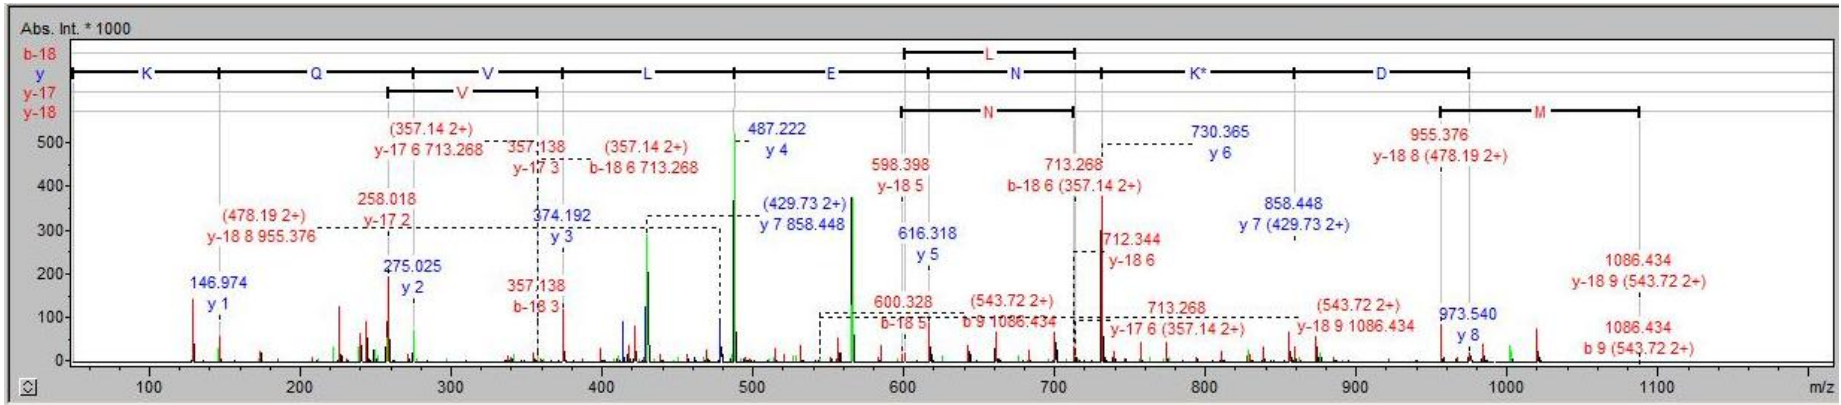

Protein View | Match Errors | MS/MS Fragments | MSMS Analysis

Sequence: MDKNELVQK (Peptide Mods: 3: Acetyl (K))

MH+(mono): 1104.572    MH+(avg): 1105.289    MS/MS Toj: 0.500    Da    Peaks: 115    Above Threshold: 115    Zoom to m/z for 2+    Zoom +/-: 5    Da

Masses:  Monoisotopic     Average    Calculate: Masses    Threshold: 0.000    Assigned: 19    Not Assigned: 96    1+, m/z: 0.000

|      | M | D | K  | N | E | L | V | Q | K | Met     | Asp     | Lys     | Asn     | Glu     | Leu     | Val     | Gln     | Lys      |
|------|---|---|----|---|---|---|---|---|---|---------|---------|---------|---------|---------|---------|---------|---------|----------|
| Ion  | 1 | 2 | 3  | 4 | 5 | 6 | 7 | 8 | 9 | 1       | 2       | 3       | 4       | 5       | 6       | 7       | 8       | 9        |
| b    | M | D | K* | N | E | L | V | Q | K | 132.048 | 247.075 | 375.170 | 489.213 | 618.255 | 731.339 | 830.408 | 958.466 | 1086.561 |
| b-17 | M | D | K* | N | E | L | V | Q | K | -       | -       | 358.143 | 472.186 | 601.229 | 714.313 | 813.381 | 941.440 | 1069.535 |
| b-18 | M | D | K* | N | E | L | V | Q | K | -       | 229.064 | 357.159 | 471.202 | 600.245 | 713.329 | 812.397 | 940.456 | 1068.551 |
| y    | M | D | K* | N | E | L | V | Q | K | 147.113 | 275.171 | 374.240 | 487.324 | 616.366 | 730.409 | 858.504 | 973.531 | 1104.572 |
| y-17 | M | D | K* | N | E | L | V | Q | K | 130.086 | 258.145 | 357.213 | 470.297 | 599.340 | 713.383 | 841.478 | 956.505 | 1087.545 |
| y-18 | M | D | K* | N | E | L | V | Q | K | -       | -       | -       | -       | 598.356 | 712.399 | 840.494 | 955.521 | 1086.561 |
|      | 9 | 8 | 7  | 6 | 5 | 4 | 3 | 2 | 1 | Lys     | Gln     | Val     | Leu     | Glu     | Asn     | Lys     | Asp     | Met      |



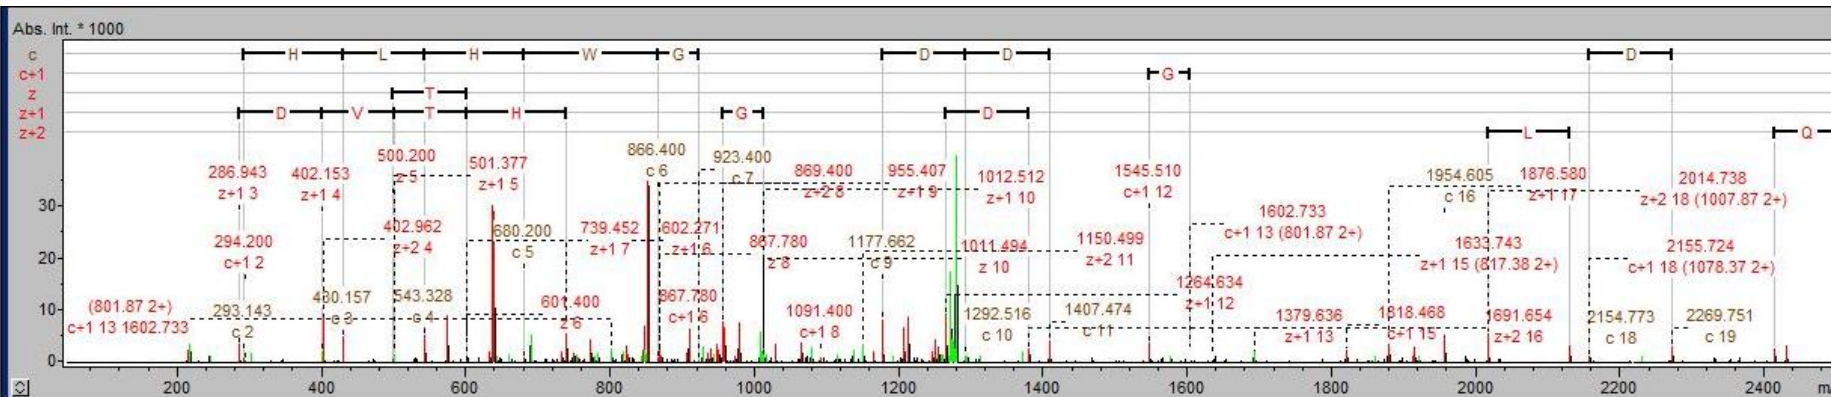

Protein View | Match Errors | MS/MS Fragments | MSMS Analysis

Sequence: QFHLHWGSSDDHGSEHTVDGVK (Peptide Mods: 8: Phospho (ST))

MH+(mono): 2555.074    MH+(avg): 2556.536    MS/MS Tot: 0.500    Da    Peaks: 119    Above Threshold: 119    Zoom to m/z for 2+    Zoom +/-: 5    Da

Masses:  Monoisotopic     Average    Calculate: Masses    Threshold: 0.000    Assigned: 44    Not Assigned: 75    1+, m/z: 131.094

|     | Q  | F  | H  | L  | H  | W  | G  | S  | S  | D  | H  | G  | S  | E  | H  | T  | V  | D  | G  | V  | K  | Gln     | Phe     | His     | Leu     | His     | Trp     | Gly     | Ser      | Ser      | Asp      | Asp      | His      |     |   |
|-----|----|----|----|----|----|----|----|----|----|----|----|----|----|----|----|----|----|----|----|----|----|---------|---------|---------|---------|---------|---------|---------|----------|----------|----------|----------|----------|-----|---|
| Ion | 1  | 2  | 3  | 4  | 5  | 6  | 7  | 8  | 9  | 10 | 11 | 12 | 13 | 14 | 15 | 16 | 17 | 18 | 19 | 20 | 21 | 22      | 1       | 2       | 3       | 4       | 5       | 6       | 7        | 8        | 9        | 10       | 11       | 12  | 1 |
| c   | Q  | F  | H  | L  | H  | W  | G  | S* | S  | D  | H  | G  | S  | E  | H  | T  | V  | D  | G  | V  | K  | 146.092 | 293.161 | 430.220 | 543.304 | 680.363 | 866.442 | 923.463 | 1090.462 | 1177.494 | 1292.521 | 1407.548 | 1544.607 |     |   |
| c+1 | Q  | F  | H  | L  | H  | W  | G  | S* | S  | D  | H  | G  | S  | E  | H  | T  | V  | D  | G  | V  | K  | 147.100 | 294.169 | 431.228 | 544.312 | 681.371 | 867.450 | 924.471 | 1091.470 | 1178.502 | 1293.529 | 1408.556 | 1545.614 |     |   |
| z   | Q  | F  | H  | L  | H  | W  | G  | S* | S  | D  | H  | G  | S  | E  | H  | T  | V  | D  | G  | V  | K  | 130.086 | 229.155 | 286.176 | 401.203 | 500.271 | 601.319 | 738.378 | 867.421  | 954.453  | 1011.474 | 1148.533 | 1263.560 |     |   |
| z+1 | Q  | F  | H  | L  | H  | W  | G  | S* | S  | D  | H  | G  | S  | E  | H  | T  | V  | D  | G  | V  | K  | 131.094 | 230.162 | 287.184 | 402.211 | 501.279 | 602.327 | 739.386 | 868.428  | 955.461  | 1012.482 | 1149.541 | 1264.568 |     |   |
| z+2 | Q  | F  | H  | L  | H  | W  | G  | S* | S  | D  | H  | G  | S  | E  | H  | T  | V  | D  | G  | V  | K  | 132.102 | 231.170 | 288.192 | 403.219 | 502.287 | 603.335 | 740.394 | 869.436  | 956.468  | 1013.490 | 1150.549 | 1265.576 |     |   |
|     | 22 | 21 | 20 | 19 | 18 | 17 | 16 | 15 | 14 | 13 | 12 | 11 | 10 | 9  | 8  | 7  | 6  | 5  | 4  | 3  | 2  | 1       | Lys     | Val     | Gly     | Asp     | Val     | Thr     | His      | Glu      | Ser      | Gly      | His      | Asp |   |

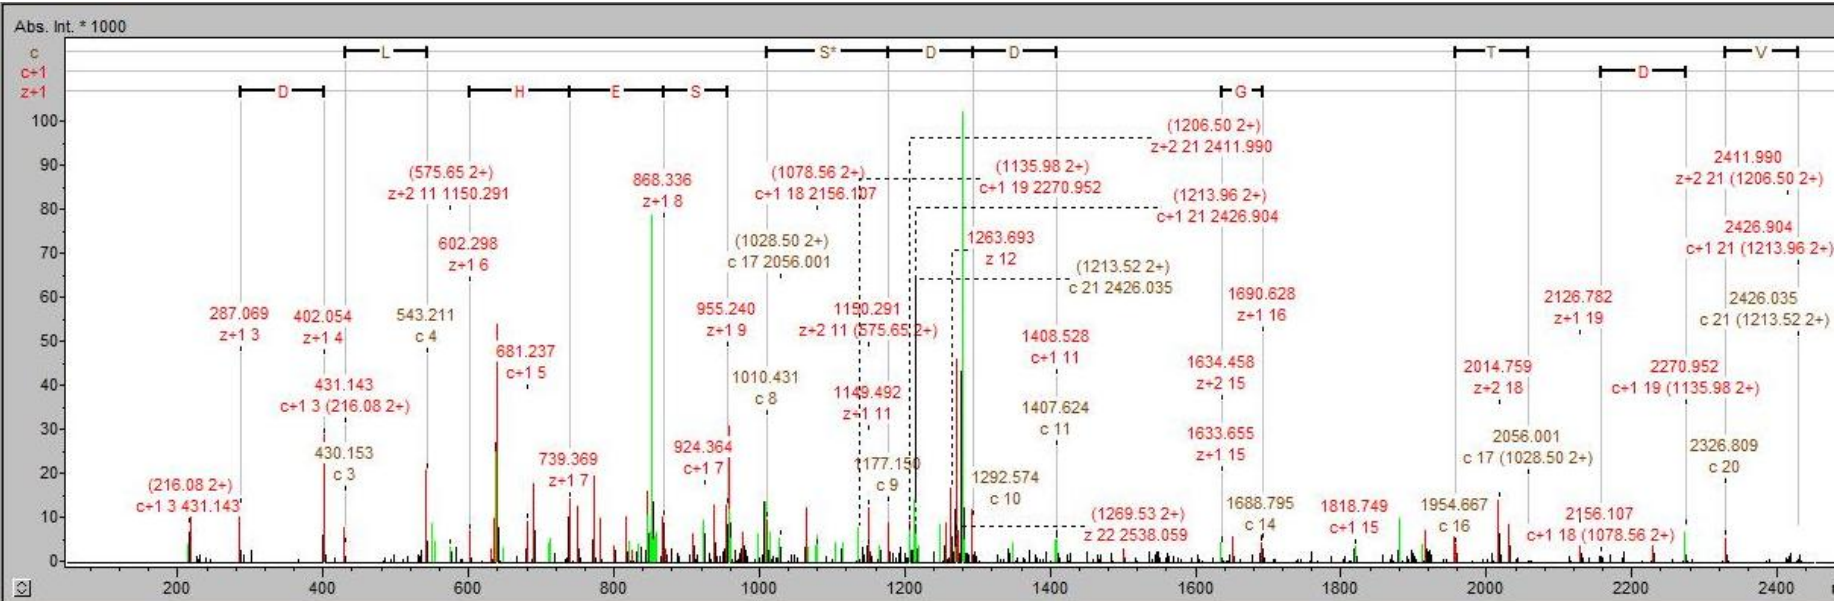

Protein View | Match Errors | MS/MS Fragments | MSMS Analysis

Sequence: QFHLHWGSSDDHGSEHTVDGVK (Peptide Mods: 9: Phospho (ST))

MH+(mono): 2555.074    MH+(avg): 2556.536    MS/MS Tol: 0.500 Da    Peaks: 98    Above Threshold: 98    Zoom to m/z for 2+    Zoom +/-: 5 Da  
 Masses:  Monoisotopic     Average    Calculate: Masses    Threshold: 0.000    Assigned: 35    Not Assigned: 63    1+, m/z: 0.000

|     | Q  | F  | H  | L  | H  | W  | G  | S  | S  | D  | D  | H  | G  | S  | E  | H  | T  | V  | D  | G  | V  | K  | Gln     | Phe     | His     | Leu     | His     | Trp     | Gly     | Ser      | Ser      | Asp      | Asp      | His      |
|-----|----|----|----|----|----|----|----|----|----|----|----|----|----|----|----|----|----|----|----|----|----|----|---------|---------|---------|---------|---------|---------|---------|----------|----------|----------|----------|----------|
| Ion | 1  | 2  | 3  | 4  | 5  | 6  | 7  | 8  | 9  | 10 | 11 | 12 | 13 | 14 | 15 | 16 | 17 | 18 | 19 | 20 | 21 | 22 | 1       | 2       | 3       | 4       | 5       | 6       | 7       | 8        | 9        | 10       | 11       | 12       |
| c   | Q  | F  | H  | L  | H  | W  | G  | S  | S* | D  | D  | H  | G  | S  | E  | H  | T  | V  | D  | G  | V  | K  | 146.092 | 293.161 | 430.220 | 543.304 | 680.363 | 866.442 | 923.463 | 1010.496 | 1177.494 | 1292.521 | 1407.548 | 1544.607 |
| c+1 | Q  | F  | H  | L  | H  | W  | G  | S  | S* | D  | D  | H  | G  | S  | E  | H  | T  | V  | D  | G  | V  | K  | 147.100 | 294.169 | 431.228 | 544.312 | 681.371 | 867.450 | 924.471 | 1011.503 | 1178.502 | 1293.529 | 1408.556 | 1545.614 |
| z   | Q  | F  | H  | L  | H  | W  | G  | S  | S* | D  | D  | H  | G  | S  | E  | H  | T  | V  | D  | G  | V  | K  | 130.086 | 229.155 | 286.176 | 401.203 | 500.271 | 601.319 | 738.378 | 867.421  | 954.453  | 1011.474 | 1148.533 | 1263.560 |
| z+1 | Q  | F  | H  | L  | H  | W  | G  | S  | S* | D  | D  | H  | G  | S  | E  | H  | T  | V  | D  | G  | V  | K  | 131.094 | 230.162 | 287.184 | 402.211 | 501.279 | 602.327 | 739.386 | 868.428  | 955.461  | 1012.482 | 1149.541 | 1264.568 |
| z+2 | Q  | F  | H  | L  | H  | W  | G  | S  | S* | D  | D  | H  | G  | S  | E  | H  | T  | V  | D  | G  | V  | K  | 132.102 | 231.170 | 288.192 | 403.219 | 502.287 | 603.335 | 740.394 | 869.436  | 956.468  | 1013.490 | 1150.549 | 1265.576 |
|     | 22 | 21 | 20 | 19 | 18 | 17 | 16 | 15 | 14 | 13 | 12 | 11 | 10 | 9  | 8  | 7  | 6  | 5  | 4  | 3  | 2  | 1  | Lys     | Val     | Gly     | Asp     | Val     | Thr     | His     | Glu      | Ser      | Gly      | His      | Asp      |



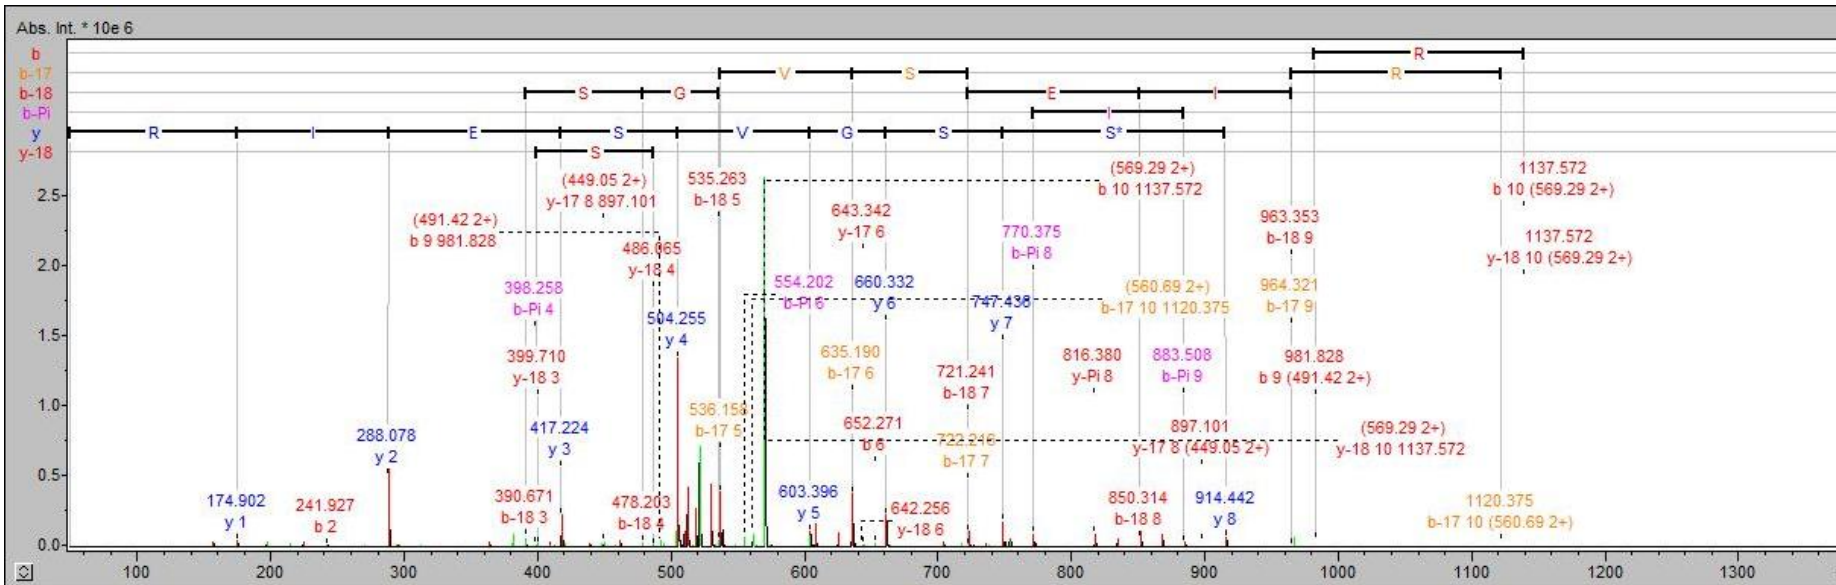

Protein View | Match Errors | MS/MS Fragments | MSMS Analysis

Sequence: QLSSGVSEIR (Peptide Mods: 3: Phospho (ST))

MH+(mono): 1155.541    MH+(avg): 1156.163    MS/MS To: 0.500 Da    Peaks: 82    Above Threshold: 82    Zoom to m/z for 2+    Zoom +/-: 5 Da

Masses:  Monoisotopic     Average    Calculate: Masses    Threshold: 0.000    Assigned: 34    Not Assigned: 48    1+, m/z: 0.000

| Ion  | Q  | L | S  | S | G | V | S | E | I | R  | Gln     | Leu     | Ser     | Ser     | Gly     | Val     | Ser     | Glu     | Ile      | Arg      |
|------|----|---|----|---|---|---|---|---|---|----|---------|---------|---------|---------|---------|---------|---------|---------|----------|----------|
|      | 1  | 2 | 3  | 4 | 5 | 6 | 7 | 8 | 9 | 10 | 1       | 2       | 3       | 4       | 5       | 6       | 7       | 8       | 9        | 10       |
| b    | Q  | L | S* | S | G | V | S | E | I | R  | 129.066 | 242.150 | 409.148 | 496.180 | 553.202 | 652.270 | 739.302 | 868.345 | 981.429  | 1137.530 |
| b-17 | Q  | L | S* | S | G | V | S | E | I | R  | 112.039 | 225.123 | 392.122 | 479.154 | 536.175 | 635.244 | 722.276 | 851.318 | 964.402  | 1120.503 |
| b-18 | Q  | L | S* | S | G | V | S | E | I | R  | -       | -       | 391.138 | 478.170 | 535.191 | 634.260 | 721.292 | 850.334 | 963.418  | 1119.519 |
| b-Pi | Q  | L | S* | S | G | V | S | E | I | R  | -       | -       | 311.171 | 398.203 | 455.225 | 554.293 | 641.325 | 770.368 | 883.452  | 1039.553 |
| y    | Q  | L | S* | S | G | V | S | E | I | R  | 175.119 | 288.203 | 417.246 | 504.278 | 603.346 | 660.368 | 747.400 | 914.398 | 1027.482 | 1155.541 |
| y-17 | Q  | L | S* | S | G | V | S | E | I | R  | 158.092 | 271.176 | 400.219 | 487.251 | 586.320 | 643.341 | 730.373 | 897.371 | 1010.455 | 1138.514 |
| y-18 | Q  | L | S* | S | G | V | S | E | I | R  | -       | -       | 399.235 | 486.267 | 585.335 | 642.357 | 729.389 | 896.387 | 1009.471 | 1137.530 |
| y-Pi | Q  | L | S* | S | G | V | S | E | I | R  | -       | -       | -       | 406.301 | 505.369 | 562.391 | 649.423 | 816.421 | 929.505  | 1057.564 |
|      | 10 | 9 | 8  | 7 | 6 | 5 | 4 | 3 | 2 | 1  | Arg     | Ile     | Glu     | Ser     | Val     | Gly     | Ser     | Ser     | Leu      | Gln      |

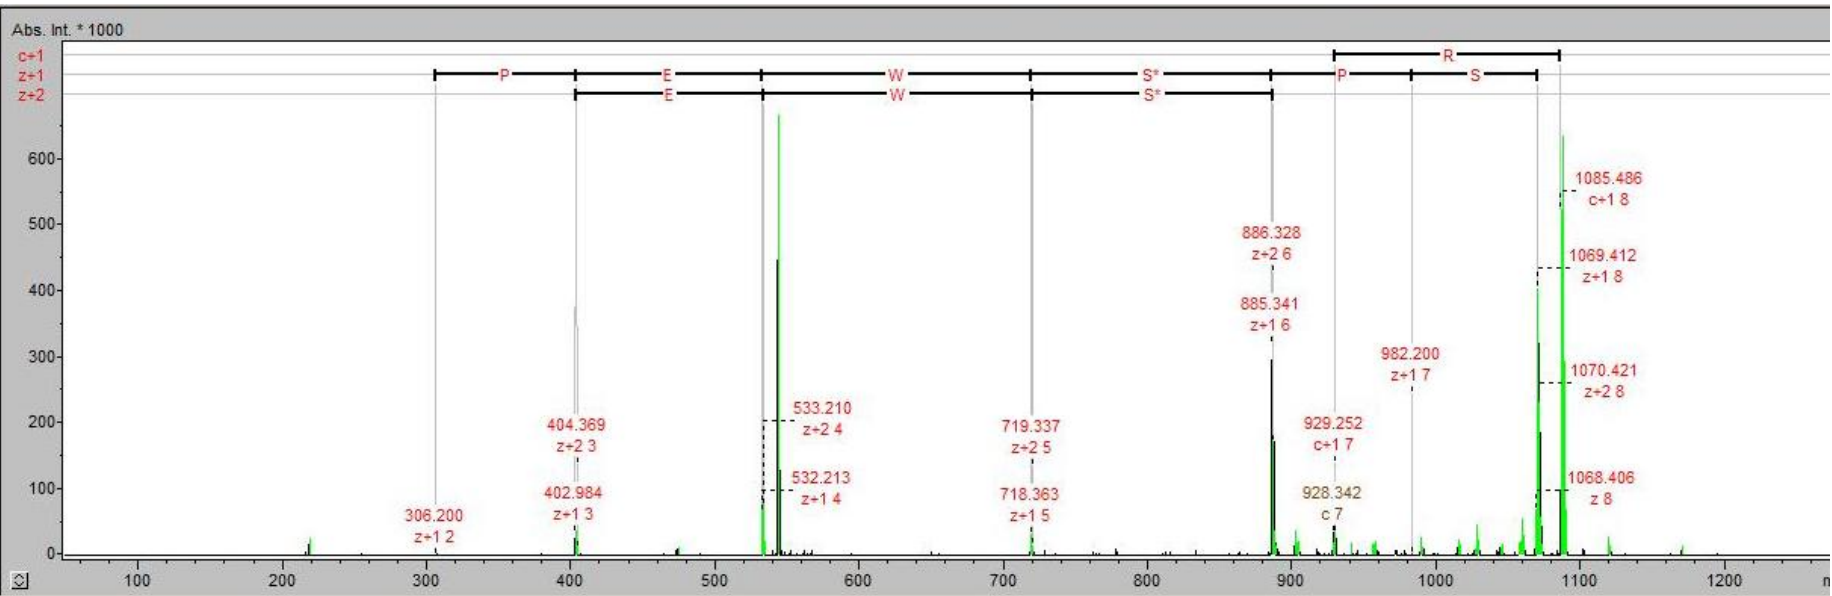

Protein View | Match Errors | MS/MS Fragments | MSMS Analysis

Sequence: SPSWEFPR (Peptide Mods: 3: Phospho (ST))

MH+(mono): 1085.445    MH+(avg): 1086.073    MS/MS Tol: 0.500 Da    Peaks: 52    Above Threshold: 52    Zoom to m/z for 2+    Zoom +/-: 5 Da

Masses:  Monoisotopic     Average    Calculate: Masses    Threshold: 0.000    Assigned: 16    Not Assigned: 36    1+, m/z: 1084.461

|     | S | P | S  | W | E | P | F | R | Ser     | Pro     | Ser     | Trp     | Glu     | Pro     | Phe     | Arg      |
|-----|---|---|----|---|---|---|---|---|---------|---------|---------|---------|---------|---------|---------|----------|
| Ion | 1 | 2 | 3  | 4 | 5 | 6 | 7 | 8 | 1       | 2       | 3       | 4       | 5       | 6       | 7       | 8        |
| c   | S | P | S* | W | E | P | F | R | 105.066 | 202.119 | 369.117 | 555.196 | 684.239 | 781.292 | 928.360 | 1084.461 |
| c+1 | S | P | S* | W | E | P | F | R | 106.074 | 203.126 | 370.125 | 556.204 | 685.247 | 782.299 | 929.368 | 1085.469 |
| z   | S | P | S* | W | E | P | F | R | 158.092 | 305.161 | 402.214 | 531.256 | 717.335 | 884.334 | 981.387 | 1068.419 |
| z+1 | S | P | S* | W | E | P | F | R | 159.100 | 306.169 | 403.221 | 532.264 | 718.343 | 885.342 | 982.394 | 1069.426 |
| z+2 | S | P | S* | W | E | P | F | R | 160.108 | 307.176 | 404.229 | 533.272 | 719.351 | 886.349 | 983.402 | 1070.434 |
|     | 8 | 7 | 6  | 5 | 4 | 3 | 2 | 1 | Arg     | Phe     | Pro     | Glu     | Trp     | Ser     | Pro     | Ser      |



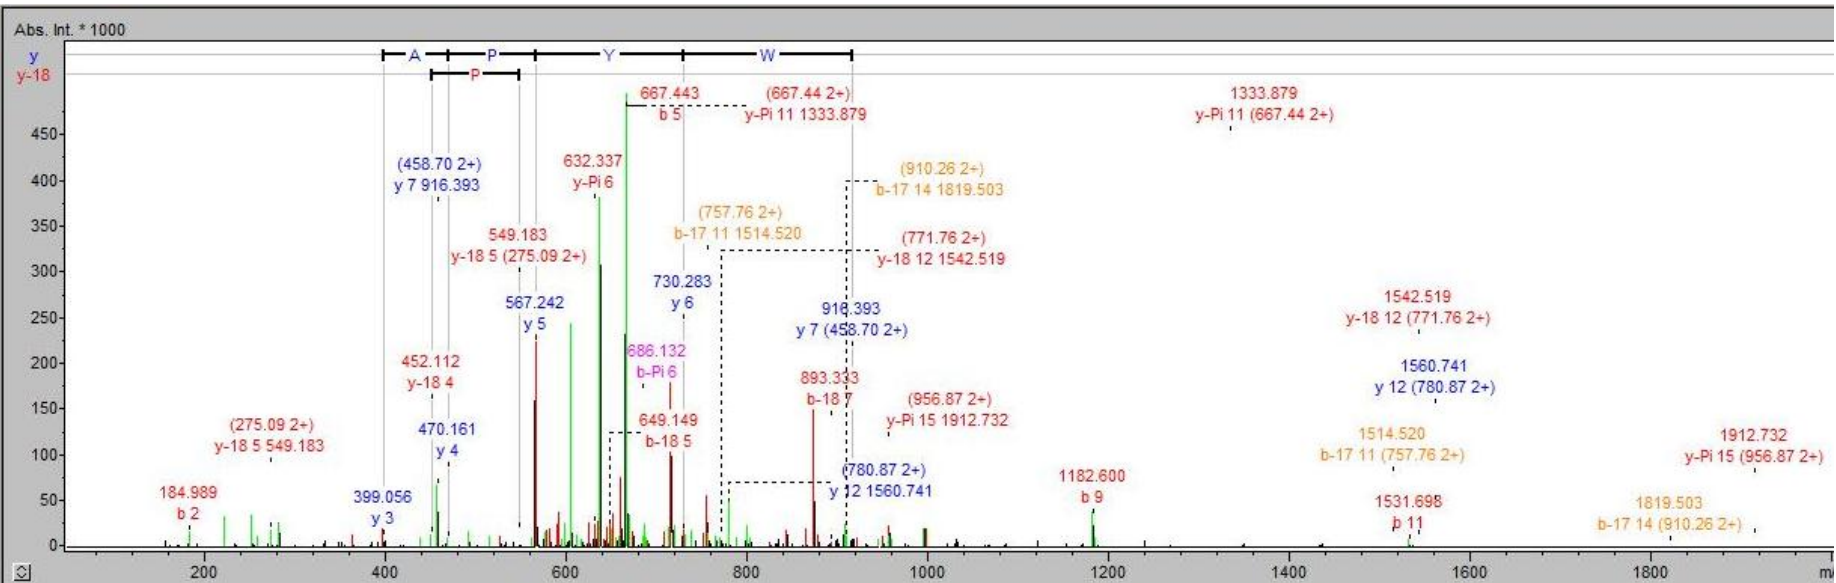

Protein View | Match Errors | MS/MS Fragments | MSMS Analysis

Sequence: SPSWEFPRDWYPAHSR (Peptide Mods: 3: Phospho (ST))

MH+(mono): 2097.897    MH+(avg): 2099.142    MS/MS Tol: 0.500    Da    Peaks: 84    Above Threshold: 84    Zoom to m/z for 2+    Zoom +/-: 5    Da

Masses:  Monoisotopic     Average    Calculate: Masses    Threshold: 0.000    Assigned: 21    Not Assigned: 63    1+, m/z: 0.000

|      | S  | P  | S  | W  | E  | P  | F  | R | D | W  | Y  | P  | A  | H  | S  | R  | Ser     | Pro     | Ser     | Trp     | Glu     | Pro     | Phe      | Arg      | Asp      | Trp      | Tyr      | Pro      | Ala      | H  |
|------|----|----|----|----|----|----|----|---|---|----|----|----|----|----|----|----|---------|---------|---------|---------|---------|---------|----------|----------|----------|----------|----------|----------|----------|----|
| Ion  | 1  | 2  | 3  | 4  | 5  | 6  | 7  | 8 | 9 | 10 | 11 | 12 | 13 | 14 | 15 | 16 | 1       | 2       | 3       | 4       | 5       | 6       | 7        | 8        | 9        | 10       | 11       | 12       | 13       | 14 |
| b    | S  | P  | S* | W  | E  | P  | F  | R | D | W  | Y  | P  | A  | H  | S  | R  | 88.039  | 185.092 | 352.090 | 538.170 | 667.212 | 764.265 | 911.334  | 1067.435 | 1182.462 | 1368.541 | 1531.604 | 1628.657 | 1699.694 | 18 |
| b-17 | S  | P  | S* | W  | E  | P  | F  | R | D | W  | Y  | P  | A  | H  | S  | R  | -       | -       | -       | -       | -       | -       | 1050.408 | 1165.435 | 1351.514 | 1514.578 | 1611.630 | 1682.668 | 18       |    |
| b-18 | S  | P  | S* | W  | E  | P  | F  | R | D | W  | Y  | P  | A  | H  | S  | R  | 70.029  | 167.082 | 334.080 | 520.159 | 649.202 | 746.255 | 893.323  | 1049.424 | 1164.451 | 1350.530 | 1513.594 | 1610.646 | 1681.684 | 18 |
| b-Pi | S  | P  | S* | W  | E  | P  | F  | R | D | W  | Y  | P  | A  | H  | S  | R  | -       | 106.990 | 273.989 | 460.068 | 589.111 | 686.163 | 833.232  | 989.333  | 1104.360 | 1290.439 | 1453.502 | 1550.555 | 1621.592 | 17 |
| y    | S  | P  | S* | W  | E  | P  | F  | R | D | W  | Y  | P  | A  | H  | S  | R  | 175.119 | 262.151 | 399.210 | 470.247 | 567.300 | 730.363 | 916.442  | 1031.469 | 1187.570 | 1334.639 | 1431.692 | 1560.734 | 1746.814 | 19 |
| y-17 | S  | P  | S* | W  | E  | P  | F  | R | D | W  | Y  | P  | A  | H  | S  | R  | 158.092 | 245.124 | 382.183 | 453.220 | 550.273 | 713.337 | 899.416  | 1014.443 | 1170.544 | 1317.612 | 1414.665 | 1543.708 | 1729.787 | 18 |
| y-18 | S  | P  | S* | W  | E  | P  | F  | R | D | W  | Y  | P  | A  | H  | S  | R  | -       | 244.140 | 381.199 | 452.236 | 549.289 | 712.353 | 898.432  | 1013.459 | 1169.560 | 1316.628 | 1413.681 | 1542.724 | 1728.803 | 18 |
| y-Pi | S  | P  | S* | W  | E  | P  | F  | R | D | W  | Y  | P  | A  | H  | S  | R  | -       | 164.174 | 301.233 | 372.270 | 469.323 | 632.386 | 818.466  | 933.492  | 1089.594 | 1236.662 | 1333.715 | 1462.757 | 1648.837 | 18 |
|      | 16 | 15 | 14 | 13 | 12 | 11 | 10 | 9 | 8 | 7  | 6  | 5  | 4  | 3  | 2  | 1  | Arg     | Ser     | His     | Ala     | Pro     | Tyr     | Trp      | Asp      | Arg      | Phe      | Pro      | Glu      | Trp      | S  |

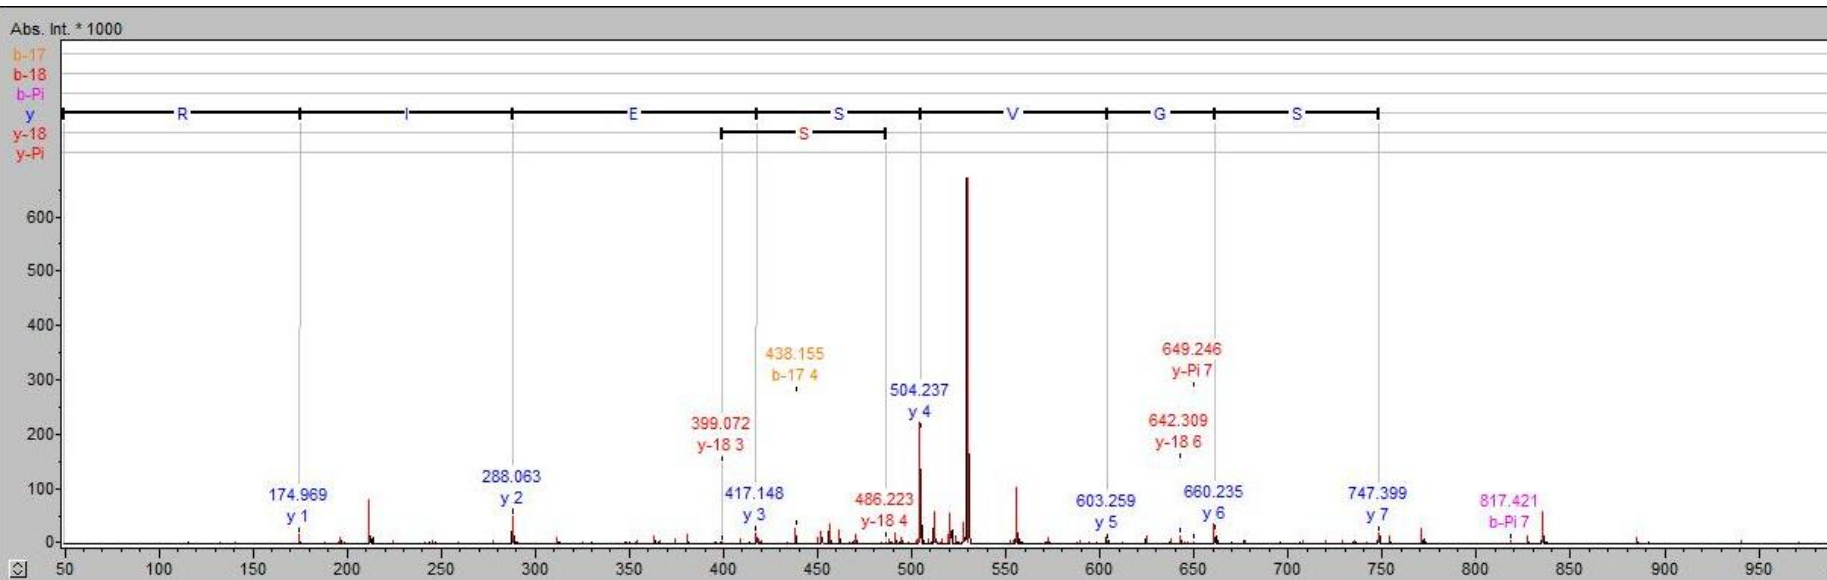

Protein View | Match Errors | MS/MS Fragments | MSMS Analysis

Sequence: ALNRQLSSGVSEIR (Peptide Mods: 7: Phospho (ST))

MH+(mono): 1609.806    MH+(avg): 1610.688    MS/MS Tol: 0.500 Da    Peaks: 93    Above Threshold: 93    Zoom to m/z for 2+    Zoom +/-: 5 Da

Masses:  Monoisotopic     Average    Calculate: Masses    Threshold: 0.000    Assigned: 31    Not Assigned: 62    1+, m/z: 990.440

|      | A  | L  | N  | R  | Q  | L | S  | S | G | V  | S  | E  | I  | R  | Ala     | Leu     | Asn     | Arg     | Gln     | Leu     | Ser     | Ser     | Gly      | Val      | Ser      | Glu      | Ile      | Arg      |
|------|----|----|----|----|----|---|----|---|---|----|----|----|----|----|---------|---------|---------|---------|---------|---------|---------|---------|----------|----------|----------|----------|----------|----------|
| Ion  | 1  | 2  | 3  | 4  | 5  | 6 | 7  | 8 | 9 | 10 | 11 | 12 | 13 | 14 | 1       | 2       | 3       | 4       | 5       | 6       | 7       | 8       | 9        | 10       | 11       | 12       | 13       | 14       |
| b    | A  | L  | N  | R  | Q  | L | S* | S | G | V  | S  | E  | I  | R  | 72.044  | 185.128 | 299.171 | 455.272 | 583.331 | 696.415 | 863.413 | 950.446 | 1007.467 | 1106.535 | 1193.567 | 1322.610 | 1435.694 | 1591.795 |
| b-17 | A  | L  | N  | R  | Q  | L | S* | S | G | V  | S  | E  | I  | R  | -       | -       | 282.145 | 438.246 | 566.305 | 679.389 | 846.387 | 933.419 | 990.440  | 1089.509 | 1176.541 | 1305.583 | 1418.668 | 1574.769 |
| b-18 | A  | L  | N  | R  | Q  | L | S* | S | G | V  | S  | E  | I  | R  | -       | -       | -       | -       | -       | -       | 845.403 | 932.435 | 989.456  | 1088.525 | 1175.557 | 1304.599 | 1417.684 | 1573.785 |
| b-Pi | A  | L  | N  | R  | Q  | L | S* | S | G | V  | S  | E  | I  | R  | 25.933  | -       | -       | -       | -       | -       | 817.302 | 904.334 | 961.355  | 1060.424 | 1147.456 | 1276.498 | 1389.582 | 1545.683 |
| y    | A  | L  | N  | R  | Q  | L | S* | S | G | V  | S  | E  | I  | R  | 175.119 | 288.203 | 417.246 | 504.278 | 603.346 | 660.368 | 747.400 | 914.398 | 1027.482 | 1155.541 | 1311.642 | 1425.685 | 1538.769 | 1609.806 |
| y-17 | A  | L  | N  | R  | Q  | L | S* | S | G | V  | S  | E  | I  | R  | 158.092 | 271.176 | 400.219 | 487.251 | 586.320 | 643.341 | 730.373 | 897.371 | 1010.455 | 1138.514 | 1294.615 | 1408.658 | 1521.742 | 1592.779 |
| y-18 | A  | L  | N  | R  | Q  | L | S* | S | G | V  | S  | E  | I  | R  | -       | -       | 399.235 | 486.267 | 585.335 | 642.357 | 729.389 | 896.387 | 1009.471 | 1137.530 | 1293.631 | 1407.674 | 1520.758 | 1591.795 |
| y-Pi | A  | L  | N  | R  | Q  | L | S* | S | G | V  | S  | E  | I  | R  | -       | -       | -       | 406.301 | 505.369 | 562.391 | 649.423 | 816.421 | 929.505  | 1057.564 | 1213.665 | 1327.708 | 1440.792 | 1511.829 |
|      | 14 | 13 | 12 | 11 | 10 | 9 | 8  | 7 | 6 | 5  | 4  | 3  | 2  | 1  | Arg     | Ile     | Glu     | Ser     | Val     | Gly     | Ser     | Ser     | Leu      | Gln      | Arg      | Asn      | Leu      | Ala      |



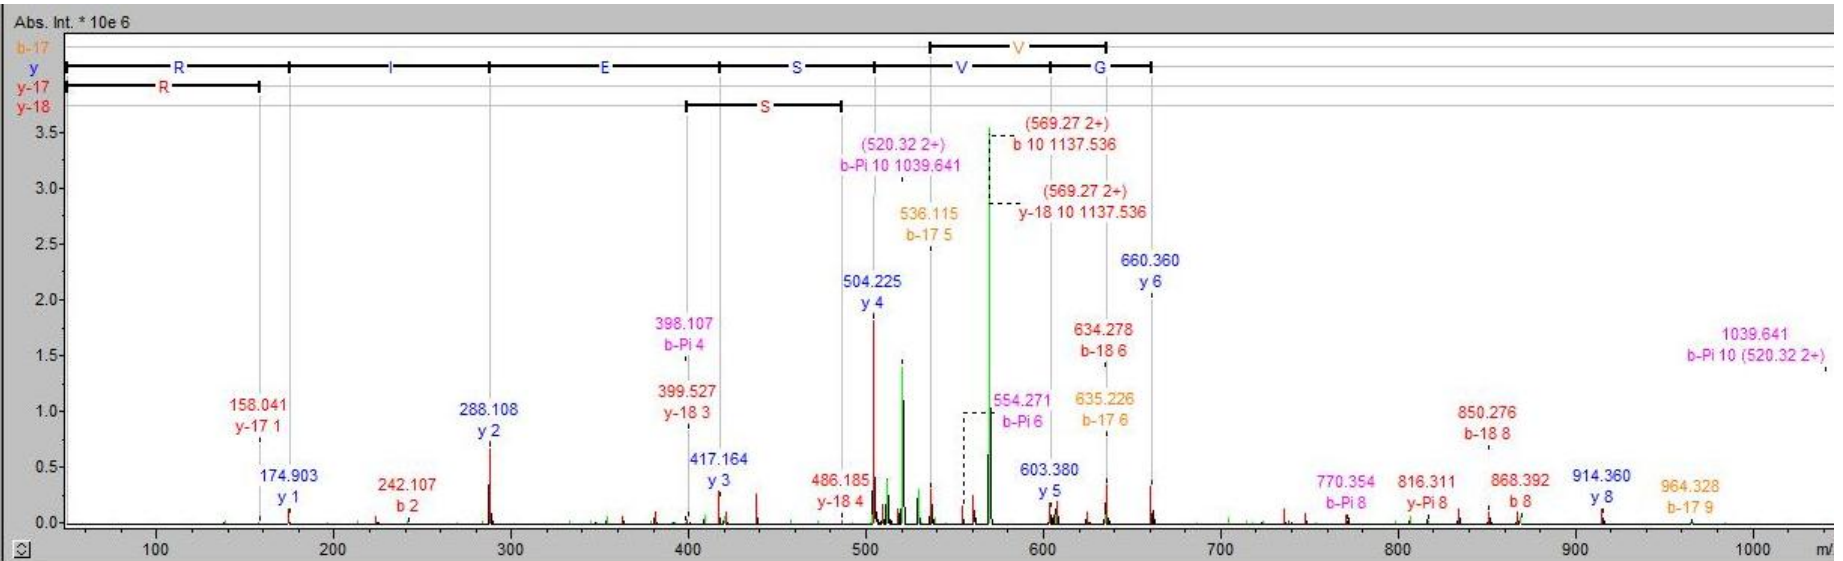

Protein View | Match Errors | MS/MS Fragments | MSMS Analysis

Sequence: QLSSGVSEIR (Peptide Mods: 4: Phospho (ST))

MH+(mono): 1155.541 MH+(avg): 1156.163 MS/MS Tol: 0.500 Da Peaks: 80 Above Threshold: 80 Zoom to m/z for 2+ Zoom +/-: 5 Da  
 Masses:  Monoisotopic  Average Calculate: Masses Threshold: 0.000 Assigned: 24 Not Assigned: 56 1+, m/z: 0.000

|      | Q  | L | S | S  | G | V | S | E | I | R  | Gln     | Leu     | Ser     | Ser     | Gly     | Val     | Ser     | Glu     | Ile      | Arg      |
|------|----|---|---|----|---|---|---|---|---|----|---------|---------|---------|---------|---------|---------|---------|---------|----------|----------|
| Ion  | 1  | 2 | 3 | 4  | 5 | 6 | 7 | 8 | 9 | 10 | 1       | 2       | 3       | 4       | 5       | 6       | 7       | 8       | 9        | 10       |
| b    | Q  | L | S | S* | G | V | S | E | I | R  | 129.066 | 242.150 | 329.182 | 496.180 | 553.202 | 652.270 | 739.302 | 868.345 | 981.429  | 1137.530 |
| b-17 | Q  | L | S | S* | G | V | S | E | I | R  | 112.039 | 225.123 | 312.155 | 479.154 | 536.175 | 635.244 | 722.276 | 851.318 | 964.402  | 1120.503 |
| b-18 | Q  | L | S | S* | G | V | S | E | I | R  | -       | -       | 311.171 | 478.170 | 535.191 | 634.260 | 721.292 | 850.334 | 963.418  | 1119.519 |
| b-Pi | Q  | L | S | S* | G | V | S | E | I | R  | -       | -       | 231.205 | 398.203 | 455.225 | 554.293 | 641.325 | 770.368 | 883.452  | 1039.553 |
| y    | Q  | L | S | S* | G | V | S | E | I | R  | 175.119 | 288.203 | 417.246 | 504.278 | 603.346 | 660.368 | 827.366 | 914.398 | 1027.482 | 1155.541 |
| y-17 | Q  | L | S | S* | G | V | S | E | I | R  | 158.092 | 271.176 | 400.219 | 487.251 | 586.320 | 643.341 | 810.339 | 897.371 | 1010.455 | 1138.514 |
| y-18 | Q  | L | S | S* | G | V | S | E | I | R  | -       | -       | 399.235 | 486.267 | 585.335 | 642.357 | 809.355 | 896.387 | 1009.471 | 1137.530 |
| y-Pi | Q  | L | S | S* | G | V | S | E | I | R  | -       | -       | -       | 406.301 | 505.369 | 562.391 | 729.389 | 816.421 | 929.505  | 1057.564 |
|      | 10 | 9 | 8 | 7  | 6 | 5 | 4 | 3 | 2 | 1  | Arg     | Ile     | Glu     | Ser     | Val     | Gly     | Ser     | Ser     | Leu      | Gln      |

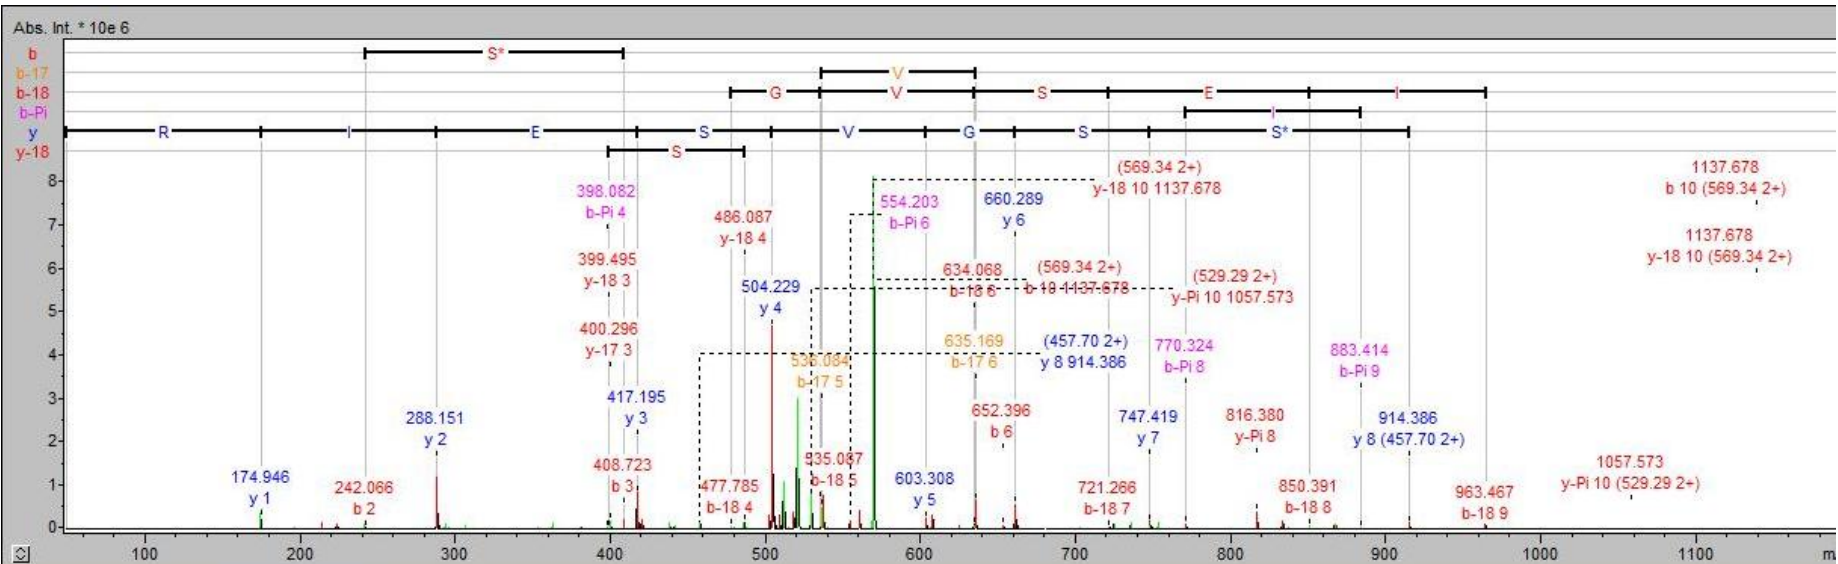

Protein View | Match Errors | MS/MS Fragments | MSMS Analysis

Sequence: QLSSGVSEIR (Peptide Mods: 3: Phospho (ST))

MH+(mono): 1155.541    MH+(avg): 1156.163    MS/MS Tol: 0.500    Da    Peaks: 78    Above Threshold: 78    Zoom to m/z for 2+    Zoom +/-: 5    Da

Masses:  Monoisotopic     Average    Calculate: Masses    Threshold: 0.000    Assigned: 30    Not Assigned: 48    1+, m/z: 0.000

|      | Q  | L | S  | S | G | V | S | E | I | R  | Gln     | Leu     | Ser     | Ser     | Gly     | Val     | Ser     | Glu     | Ile      | Arg      |
|------|----|---|----|---|---|---|---|---|---|----|---------|---------|---------|---------|---------|---------|---------|---------|----------|----------|
| Ion  | 1  | 2 | 3  | 4 | 5 | 6 | 7 | 8 | 9 | 10 | 1       | 2       | 3       | 4       | 5       | 6       | 7       | 8       | 9        | 10       |
| b    | Q  | L | S* | S | G | V | S | E | I | R  | 129.066 | 242.150 | 409.148 | 496.180 | 553.202 | 652.270 | 739.302 | 868.345 | 981.429  | 1137.530 |
| b-17 | Q  | L | S* | S | G | V | S | E | I | R  | 112.039 | 225.123 | 392.122 | 479.154 | 536.175 | 635.244 | 722.276 | 851.318 | 964.402  | 1120.503 |
| b-18 | Q  | L | S* | S | G | V | S | E | I | R  | -       | -       | 391.138 | 478.170 | 535.191 | 634.260 | 721.292 | 850.334 | 963.418  | 1119.519 |
| b-Pi | Q  | L | S* | S | G | V | S | E | I | R  | -       | -       | 311.171 | 398.203 | 455.225 | 554.293 | 641.325 | 770.368 | 883.452  | 1039.553 |
| y    | Q  | L | S* | S | G | V | S | E | I | R  | 175.119 | 288.203 | 417.246 | 504.278 | 603.346 | 660.368 | 747.400 | 914.398 | 1027.482 | 1155.541 |
| y-17 | Q  | L | S* | S | G | V | S | E | I | R  | 158.092 | 271.176 | 400.219 | 487.251 | 586.320 | 643.341 | 730.373 | 897.371 | 1010.455 | 1138.514 |
| y-18 | Q  | L | S* | S | G | V | S | E | I | R  | -       | -       | 399.235 | 486.267 | 585.335 | 642.357 | 729.389 | 896.387 | 1009.471 | 1137.530 |
| y-Pi | Q  | L | S* | S | G | V | S | E | I | R  | -       | -       | -       | 406.301 | 505.369 | 562.391 | 649.423 | 816.421 | 929.505  | 1057.564 |
|      | 10 | 9 | 8  | 7 | 6 | 5 | 4 | 3 | 2 | 1  | Arg     | Ile     | Glu     | Ser     | Val     | Gly     | Ser     | Ser     | Leu      | Gln      |



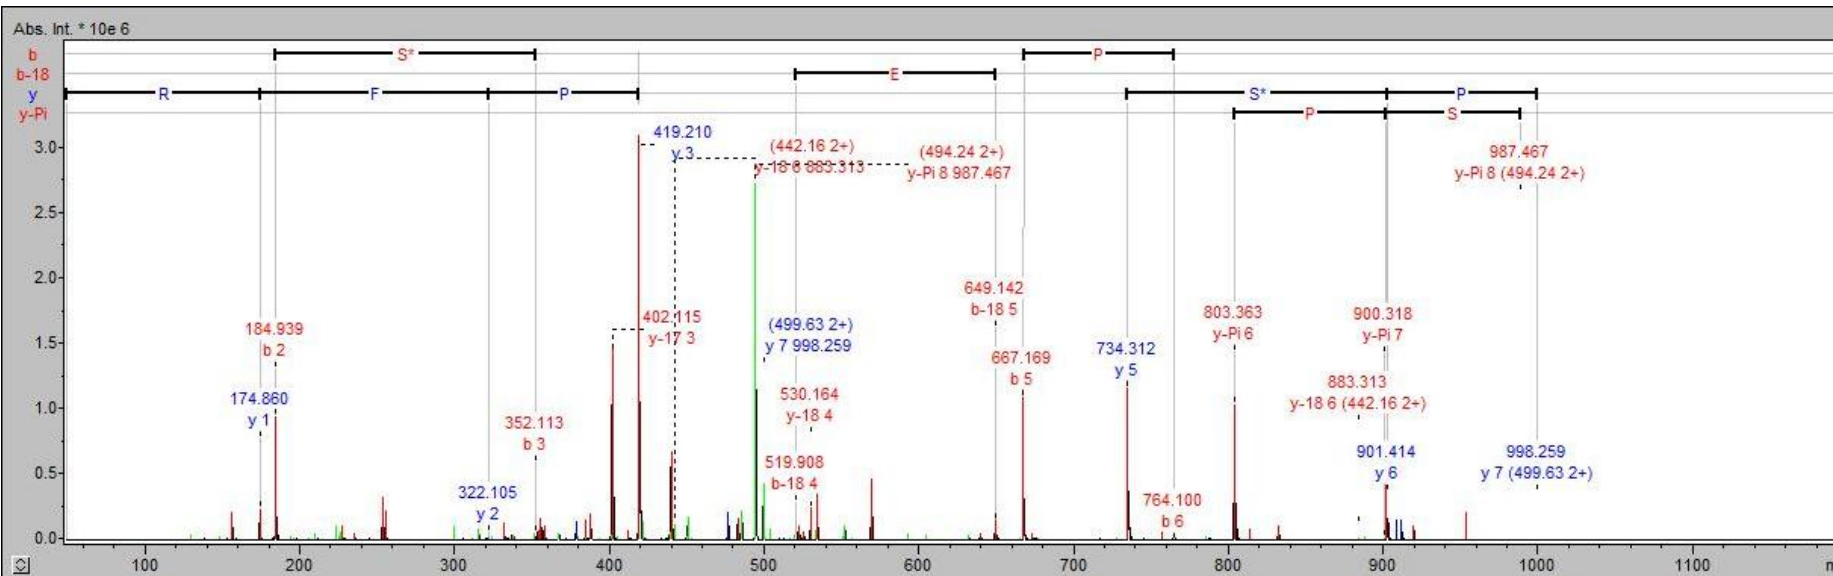

Protein View | Match Errors | MS/MS Fragments | MSMS Analysis

Sequence: SPSWEPFR (Peptide Mods: 3: Phospho (ST))

MH+(mono): 1085.445    MH+(avg): 1086.073    MS/MS Tol: 0.500 Da    Peaks: 88    Above Threshold: 88    Zoom to m/z for 2+    Zoom +/-: 5 Da

Masses:  Monoisotopic  Average    Calculate: Masses    Threshold: 0.000    Assigned: 18    Not Assigned: 70    1+, m/z: 0.000

|      | S | P | S  | W | E | P | F | R | Ser     | Pro     | Ser     | Trp     | Glu     | Pro     | Phe     | Arg      |
|------|---|---|----|---|---|---|---|---|---------|---------|---------|---------|---------|---------|---------|----------|
| Ion  | 1 | 2 | 3  | 4 | 5 | 6 | 7 | 8 | 1       | 2       | 3       | 4       | 5       | 6       | 7       | 8        |
| b    | S | P | S* | W | E | P | F | R | 88.039  | 185.092 | 352.090 | 538.170 | 667.212 | 764.265 | 911.334 | 1067.435 |
| b-17 | S | P | S* | W | E | P | F | R | -       | -       | -       | -       | -       | -       | -       | 1050.408 |
| b-18 | S | P | S* | W | E | P | F | R | 70.029  | 167.082 | 334.080 | 520.159 | 649.202 | 746.255 | 893.323 | 1049.424 |
| b-Pi | S | P | S* | W | E | P | F | R | -       | 106.990 | 273.989 | 460.068 | 589.111 | 686.163 | 833.232 | 989.333  |
| y    | S | P | S* | W | E | P | F | R | 175.119 | 322.187 | 419.240 | 548.283 | 734.362 | 901.360 | 998.413 | 1085.445 |
| y-17 | S | P | S* | W | E | P | F | R | 158.092 | 305.161 | 402.214 | 531.256 | 717.335 | 884.334 | 981.387 | 1068.419 |
| y-18 | S | P | S* | W | E | P | F | R | -       | -       | -       | 530.272 | 716.351 | 883.350 | 980.403 | 1067.435 |
| y-Pi | S | P | S* | W | E | P | F | R | -       | -       | -       | -       | -       | 803.383 | 900.436 | 987.468  |
|      | 8 | 7 | 6  | 5 | 4 | 3 | 2 | 1 | Arg     | Phe     | Pro     | Glu     | Trp     | Ser     | Pro     | Ser      |

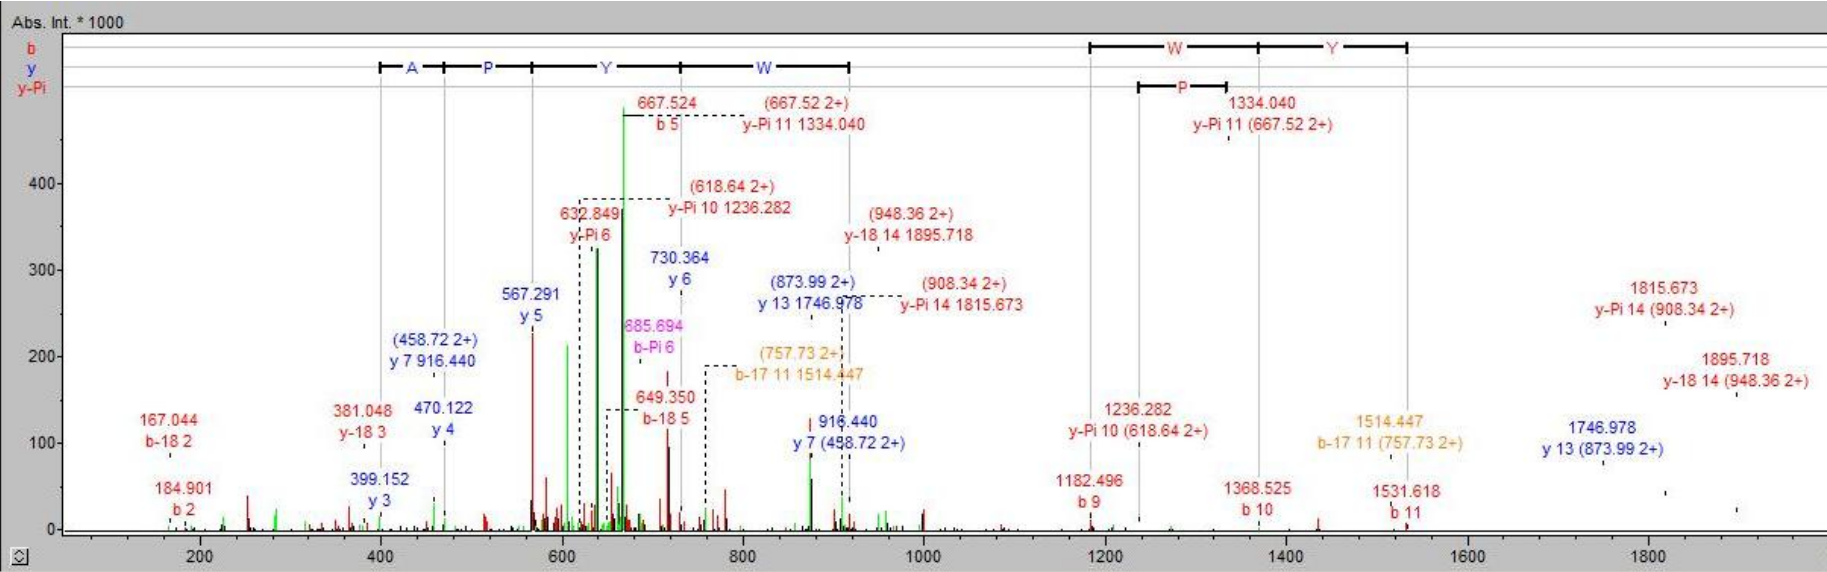

Protein View | Match Errors | MS/MS Fragments | MSMS Analysis

Sequence: SPSWEPFRDWPYPAHSR (Peptide Mods: 3: Phospho (ST))

MH+(mono): 2097.897 | MH+(avg): 2099.142 | MS/MS Tol: 0.500 Da | Peaks: 98 | Above Threshold: 98 | Zoom to m/z for 2+ | Zoom +/-: 5 Da

Masses:  Monoisotopic  Average | Calculate: Masses | Threshold: 0.000 | Assigned: 21 | Not Assigned: 77 | 1+, m/z: 0.000

|      | S  | P  | S              | W  | E  | P  | F  | R | D | W  | Y  | P  | A  | H  | S  | R  | Ser     | Pro     | Ser     | Trp     | Glu     | Pro     | Phe     | Arg      | Asp      | Trp      | Tyr      | Pro      | Ala      | H        |    |
|------|----|----|----------------|----|----|----|----|---|---|----|----|----|----|----|----|----|---------|---------|---------|---------|---------|---------|---------|----------|----------|----------|----------|----------|----------|----------|----|
| Ion  | 1  | 2  | 3              | 4  | 5  | 6  | 7  | 8 | 9 | 10 | 11 | 12 | 13 | 14 | 15 | 16 | 1       | 2       | 3       | 4       | 5       | 6       | 7       | 8        | 9        | 10       | 11       | 12       | 13       | 14       |    |
| b    | S  | P  | S <sup>+</sup> | W  | E  | P  | F  | R | D | W  | Y  | P  | A  | H  | S  | R  | 88.039  | 185.092 | 352.090 | 538.170 | 667.212 | 764.265 | 911.334 | 1067.435 | 1182.462 | 1368.541 | 1531.604 | 1628.657 | 1699.694 | 18       |    |
| b-17 | S  | P  | S <sup>+</sup> | W  | E  | P  | F  | R | D | W  | Y  | P  | A  | H  | S  | R  | -       | -       | -       | -       | -       | -       | -       | -        | 1050.408 | 1165.435 | 1351.514 | 1514.578 | 1611.630 | 1682.668 | 18 |
| b-18 | S  | P  | S <sup>+</sup> | W  | E  | P  | F  | R | D | W  | Y  | P  | A  | H  | S  | R  | 70.029  | 167.082 | 334.080 | 520.159 | 649.202 | 746.255 | 893.323 | 1049.424 | 1164.451 | 1350.530 | 1513.594 | 1610.646 | 1681.684 | 18       |    |
| b-Pi | S  | P  | S <sup>+</sup> | W  | E  | P  | F  | R | D | W  | Y  | P  | A  | H  | S  | R  | -       | 106.990 | 273.989 | 460.068 | 589.111 | 686.163 | 833.232 | 989.333  | 1104.360 | 1290.439 | 1453.502 | 1550.555 | 1621.592 | 17       |    |
| y    | S  | P  | S <sup>+</sup> | W  | E  | P  | F  | R | D | W  | Y  | P  | A  | H  | S  | R  | 175.119 | 262.151 | 399.210 | 470.247 | 567.300 | 730.363 | 916.442 | 1031.469 | 1187.570 | 1334.639 | 1431.692 | 1560.734 | 1746.814 | 19       |    |
| y-17 | S  | P  | S <sup>+</sup> | W  | E  | P  | F  | R | D | W  | Y  | P  | A  | H  | S  | R  | 158.092 | 245.124 | 382.183 | 453.220 | 550.273 | 713.337 | 899.416 | 1014.443 | 1170.544 | 1317.612 | 1414.665 | 1543.708 | 1729.787 | 18       |    |
| y-18 | S  | P  | S <sup>+</sup> | W  | E  | P  | F  | R | D | W  | Y  | P  | A  | H  | S  | R  | -       | 244.140 | 381.199 | 452.236 | 549.289 | 712.353 | 898.432 | 1013.459 | 1169.560 | 1316.628 | 1413.681 | 1542.724 | 1728.803 | 18       |    |
| y-Pi | S  | P  | S <sup>+</sup> | W  | E  | P  | F  | R | D | W  | Y  | P  | A  | H  | S  | R  | -       | 164.174 | 301.233 | 372.270 | 469.323 | 632.386 | 818.466 | 933.492  | 1089.594 | 1236.662 | 1333.715 | 1462.757 | 1648.837 | 18       |    |
|      | 16 | 15 | 14             | 13 | 12 | 11 | 10 | 9 | 8 | 7  | 6  | 5  | 4  | 3  | 2  | 1  | Arg     | Ser     | His     | Ala     | Pro     | Tyr     | Trp     | Asp      | Arg      | Phe      | Pro      | Glu      | Trp      | S        |    |



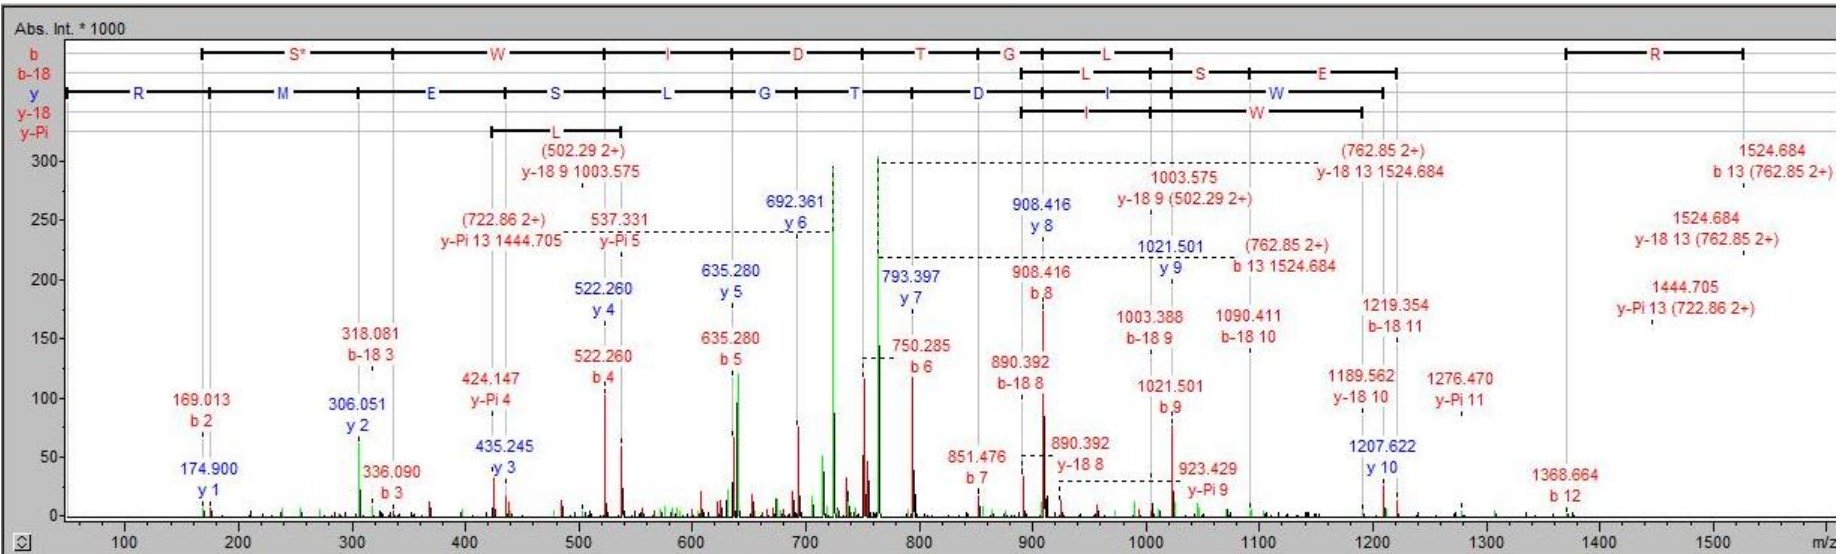

Protein View | Match Errors | MS/MS Fragments | MSMS Analysis

Sequence: APSWIDTGLSEMR (Peptide Mods: 3: Phospho (ST))

MH+(mono): 1542.666    MH+(avg): 1543.618    MS/MS Tol: 0.500 Da    Peaks: 90    Above Threshold: 90    Zoom to m/z for 2+    Zoom +/-: 5 Da

Masses:  Monoisotopic     Average    Calculate: Masses    Threshold: 0.000    Assigned: 34    Not Assigned: 56    1+, m/z: 0.000

|      | A  | P  | S  | W  | I | D | T | G | L | S  | E  | M  | R  | Ala     | Pro     | Ser     | Trp     | Ile     | Asp     | Thr     | Gly     | Leu      | Ser      | Glu      | Met      | Arg      |          |
|------|----|----|----|----|---|---|---|---|---|----|----|----|----|---------|---------|---------|---------|---------|---------|---------|---------|----------|----------|----------|----------|----------|----------|
| Ion  | 1  | 2  | 3  | 4  | 5 | 6 | 7 | 8 | 9 | 10 | 11 | 12 | 13 | 1       | 2       | 3       | 4       | 5       | 6       | 7       | 8       | 9        | 10       | 11       | 12       | 13       |          |
| b    | A  | P  | S* | W  | I | D | T | G | L | S  | E  | M  | R  | -       | 72.044  | 169.097 | 336.096 | 522.175 | 635.259 | 750.286 | 851.334 | 908.355  | 1021.439 | 1108.471 | 1237.514 | 1368.554 | 1524.655 |
| b-17 | A  | P  | S* | W  | I | D | T | G | L | S  | E  | M  | R  | -       | -       | -       | -       | -       | -       | -       | -       | -        | -        | -        | -        | -        | 1507.629 |
| b-18 | A  | P  | S* | W  | I | D | T | G | L | S  | E  | M  | R  | -       | -       | 318.085 | 504.164 | 617.248 | 732.275 | 833.323 | 890.344 | 1003.428 | 1090.461 | 1219.503 | 1350.544 | 1506.645 |          |
| b-PI | A  | P  | S* | W  | I | D | T | G | L | S  | E  | M  | R  | 25.933  | -       | 289.984 | 476.063 | 589.147 | 704.174 | 805.222 | 862.243 | 975.327  | 1062.359 | 1191.402 | 1322.442 | 1478.543 |          |
| y    | A  | P  | S* | W  | I | D | T | G | L | S  | E  | M  | R  | 175.119 | 306.159 | 435.202 | 522.234 | 635.318 | 692.340 | 793.387 | 908.414 | 1021.498 | 1207.578 | 1374.576 | 1471.629 | 1542.666 |          |
| y-17 | A  | P  | S* | W  | I | D | T | G | L | S  | E  | M  | R  | 158.092 | 289.133 | 418.175 | 505.208 | 618.292 | 675.313 | 776.361 | 891.388 | 1004.472 | 1190.551 | 1357.549 | 1454.602 | 1525.639 |          |
| y-18 | A  | P  | S* | W  | I | D | T | G | L | S  | E  | M  | R  | -       | -       | 417.191 | 504.223 | 617.308 | 674.329 | 775.377 | 890.404 | 1003.488 | 1189.567 | 1356.565 | 1453.618 | 1524.655 |          |
| y-PI | A  | P  | S* | W  | I | D | T | G | L | S  | E  | M  | R  | -       | -       | -       | 424.257 | 537.341 | 594.363 | 695.410 | 810.437 | 923.521  | 1109.601 | 1276.599 | 1373.652 | 1444.689 |          |
|      | 13 | 12 | 11 | 10 | 9 | 8 | 7 | 6 | 5 | 4  | 3  | 2  | 1  | Arg     | Met     | Glu     | Ser     | Leu     | Gly     | Thr     | Asp     | Ile      | Trp      | Ser      | Pro      | Ala      |          |

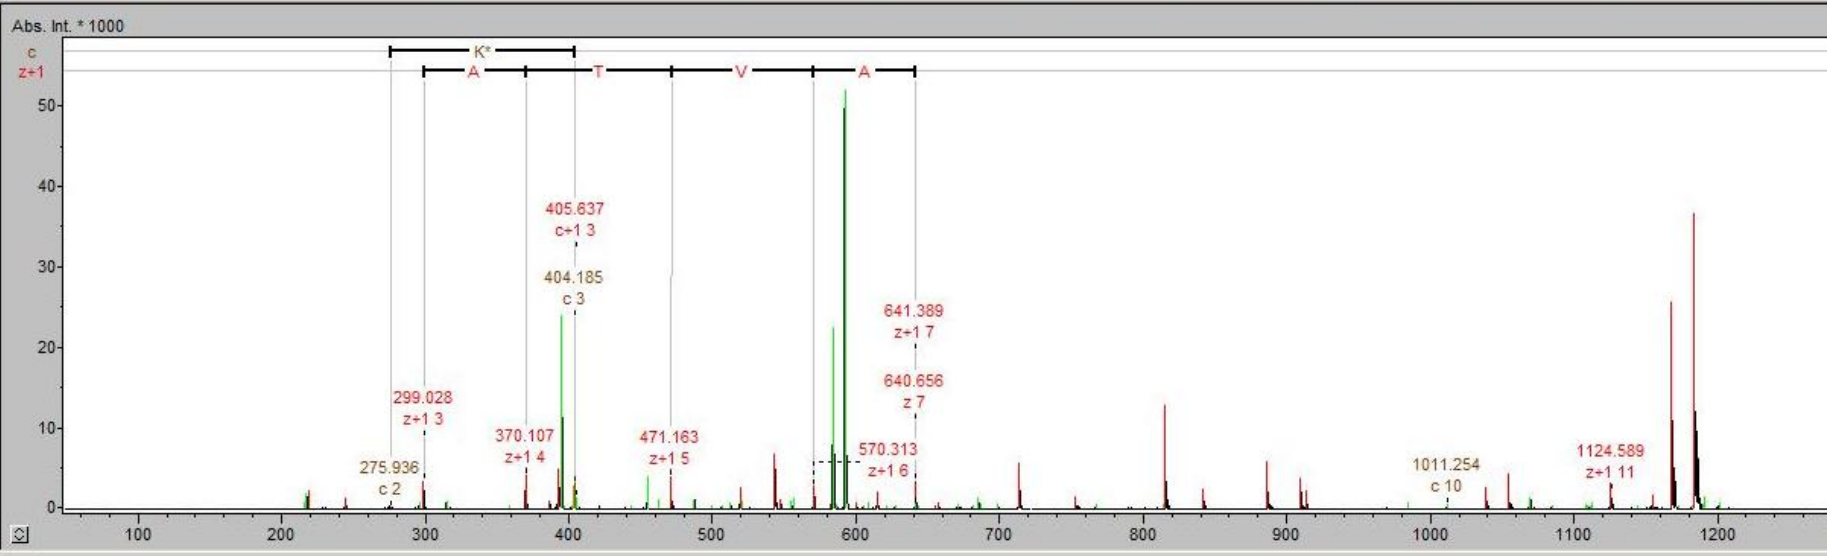

Protein View | Match Errors | MS/MS Fragments | MSMS Analysis

Sequence: EEKPAVTAAPK (Peptide Mods: 3: Acetyl (K) )

MH+(mono): 1140.626    MH+(avg): 1141.297    MS/MS To: 0.500 Da    Peaks: 82    Above Threshold: 82    Zoom to m/z for 2+:    Zoom +/-: 5 Da  
 Masses:  Monoisotopic     Average    Calculate: Masses    Threshold: 0.000    Assigned: 11    Not Assigned: 71    1+, m/z: 0.000

|     | E  | E  | K  | P | A | V | T | A | A | P  | K  | Glu     | Glu     | Lys     | Pro     | Ala     | Val     | Thr     | Ala     | Ala     | Pro      | Lys      |
|-----|----|----|----|---|---|---|---|---|---|----|----|---------|---------|---------|---------|---------|---------|---------|---------|---------|----------|----------|
| Ion | 1  | 2  | 3  | 4 | 5 | 6 | 7 | 8 | 9 | 10 | 11 | 1       | 2       | 3       | 4       | 5       | 6       | 7       | 8       | 9       | 10       | 11       |
| c   | E  | E  | K* | P | A | V | T | A | A | P  | K  | 147.076 | 276.119 | 404.214 | 501.267 | 572.304 | 671.372 | 772.420 | 843.457 | 914.494 | 1011.547 | 1139.642 |
| c+1 | E  | E  | K* | P | A | V | T | A | A | P  | K  | 148.084 | 277.127 | 405.222 | 502.275 | 573.312 | 672.380 | 773.428 | 844.465 | 915.502 | 1012.555 | 1140.650 |
| z   | E  | E  | K* | P | A | V | T | A | A | P  | K  | 130.086 | 227.139 | 298.176 | 369.213 | 470.261 | 569.329 | 640.368 | 737.419 | 865.514 | 994.557  | 1123.599 |
| z+1 | E  | E  | K* | P | A | V | T | A | A | P  | K  | 131.094 | 228.147 | 299.184 | 370.221 | 471.269 | 570.337 | 641.374 | 738.427 | 866.522 | 995.565  | 1124.607 |
| z+2 | E  | E  | K* | P | A | V | T | A | A | P  | K  | 132.102 | 229.155 | 300.192 | 371.229 | 472.277 | 571.345 | 642.382 | 739.435 | 867.530 | 996.572  | 1125.615 |
|     | 11 | 10 | 9  | 8 | 7 | 6 | 5 | 4 | 3 | 2  | 1  | Lys     | Pro     | Ala     | Ala     | Thr     | Val     | Ala     | Pro     | Lys     | Glu      | Glu      |



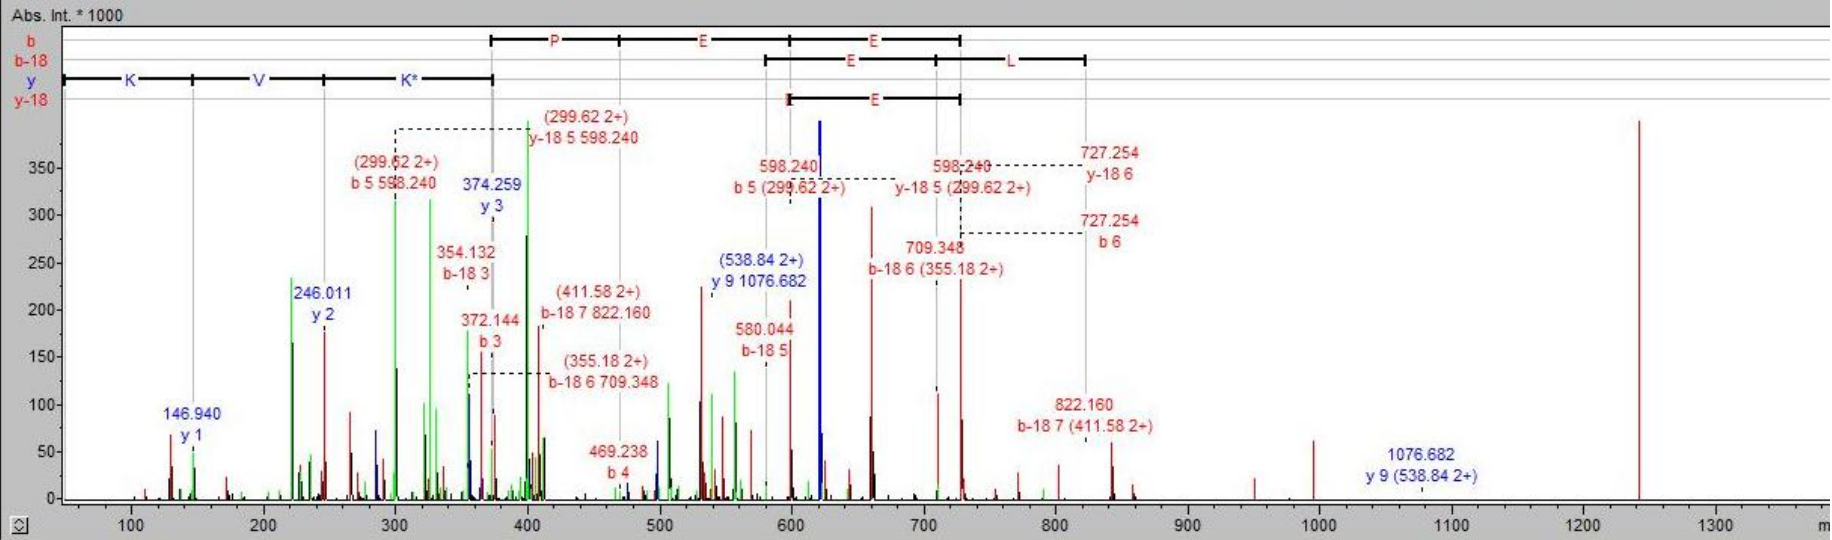

Protein View | Match Errors | MS/MS Fragments | MSMS Analysis

Sequence: HFSPEELKVK (Peptide Mods: 8: Acetyl (K))

MH+(mono): 1213.658    MH+(avg): 1214.392    MS/MS Tol: 0.500 Da    Peaks: 88    Above Threshold: 88    Zoom to m/z for 2+    Zoom +/-: 5 Da

Masses:  Monoisotopic     Average    Calculate: Masses    Threshold: 0.000    Assigned: 14    Not Assigned: 74    1+, m/z: 0.000

|      | H  | F | S | P | E | E | L | K  | V | K  | His     | Phe     | Ser     | Pro     | Glu     | Glu     | Leu     | Lys     | Val      | Lys      |
|------|----|---|---|---|---|---|---|----|---|----|---------|---------|---------|---------|---------|---------|---------|---------|----------|----------|
| Ion  | 1  | 2 | 3 | 4 | 5 | 6 | 7 | 8  | 9 | 10 | 1       | 2       | 3       | 4       | 5       | 6       | 7       | 8       | 9        | 10       |
| b    | H  | F | S | P | E | E | L | K* | V | K  | 138.066 | 285.135 | 372.167 | 469.219 | 598.262 | 727.305 | 840.389 | 968.484 | 1067.552 | 1195.647 |
| b-17 | H  | F | S | P | E | E | L | K* | V | K  | -       | -       | -       | -       | -       | -       | -       | 951.457 | 1050.525 | 1178.620 |
| b-18 | H  | F | S | P | E | E | L | K* | V | K  | -       | -       | 354.156 | 451.209 | 580.251 | 709.294 | 822.378 | 950.473 | 1049.541 | 1177.636 |
| y    | H  | F | S | P | E | E | L | K* | V | K  | 147.113 | 246.181 | 374.276 | 487.360 | 616.403 | 745.445 | 842.498 | 929.530 | 1076.599 | 1213.658 |
| y-17 | H  | F | S | P | E | E | L | K* | V | K  | 130.086 | 229.155 | 357.250 | 470.334 | 599.376 | 728.419 | 825.472 | 912.504 | 1059.572 | 1196.631 |
| y-18 | H  | F | S | P | E | E | L | K* | V | K  | -       | -       | -       | -       | 598.392 | 727.435 | 824.488 | 911.520 | 1058.588 | 1195.647 |
|      | 10 | 9 | 8 | 7 | 6 | 5 | 4 | 3  | 2 | 1  | Lys     | Val     | Lys     | Leu     | Glu     | Glu     | Pro     | Ser     | Phe      | His      |

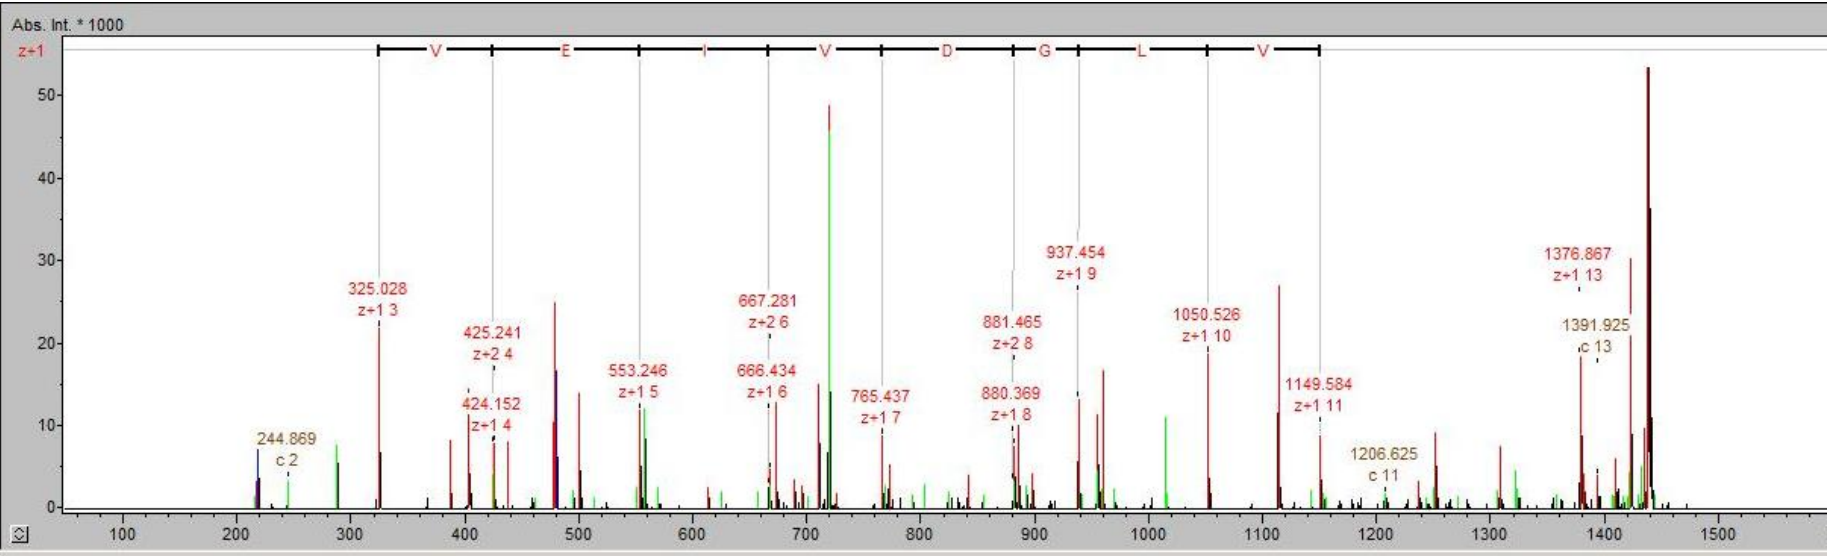

Protein View | Match Errors | MS/MS Fragments | MSMS Analysis

Sequence: VKVLGDVIEVHGK (Peptide Mods: 2: Acetyl (K))

MH+(mono): 1392.821    MH+(avg): 1393.653    MS/MS Toj: 0.500    Da    Peaks: 91    Above Threshold: 91    Zoom to m/z for 2+    Zoom +/-: 5    Da

Masses:  Monoisotopic     Average    Calculate: Masses    Threshold: 0.000    Assigned: 16    Not Assigned: 75    1+, m/z: 326.182

|     | V  | K  | V  | L  | G | D | V | I | E | V  | H  | G  | K  | Val     | Lys     | Val     | Leu     | Gly     | Asp     | Val     | Ile     | Glu     | Val      | His      | Gly      | Lys      |
|-----|----|----|----|----|---|---|---|---|---|----|----|----|----|---------|---------|---------|---------|---------|---------|---------|---------|---------|----------|----------|----------|----------|
| Ion | 1  | 2  | 3  | 4  | 5 | 6 | 7 | 8 | 9 | 10 | 11 | 12 | 13 | 1       | 2       | 3       | 4       | 5       | 6       | 7       | 8       | 9       | 10       | 11       | 12       | 13       |
| c   | V  | K* | V  | L  | G | D | V | I | E | V  | H  | G  | K  | 117.102 | 245.197 | 344.266 | 457.350 | 514.371 | 629.398 | 728.466 | 841.551 | 970.593 | 1069.662 | 1206.720 | 1263.742 | 1391.837 |
| c+1 | V  | K* | V  | L  | G | D | V | I | E | V  | H  | G  | K  | 118.110 | 246.205 | 345.273 | 458.358 | 515.379 | 630.406 | 729.474 | 842.558 | 971.601 | 1070.669 | 1207.728 | 1264.750 | 1392.845 |
| z   | V  | K* | V  | L  | G | D | V | I | E | V  | H  | G  | K  | 130.086 | 187.108 | 324.167 | 423.235 | 552.278 | 665.362 | 764.430 | 879.457 | 936.479 | 1049.563 | 1148.631 | 1276.726 | 1375.794 |
| z+1 | V  | K* | V  | L  | G | D | V | I | E | V  | H  | G  | K  | 131.094 | 188.116 | 325.174 | 424.243 | 553.285 | 666.370 | 765.438 | 880.465 | 937.486 | 1050.570 | 1149.639 | 1277.734 | 1376.802 |
| z+2 | V  | K* | V  | L  | G | D | V | I | E | V  | H  | G  | K  | 132.102 | 189.123 | 326.182 | 425.251 | 554.293 | 667.377 | 766.446 | 881.473 | 938.494 | 1051.578 | 1150.647 | 1278.742 | 1377.810 |
|     | 13 | 12 | 11 | 10 | 9 | 8 | 7 | 6 | 5 | 4  | 3  | 2  | 1  | Lys     | Gly     | His     | Val     | Glu     | Ile     | Val     | Asp     | Gly     | Leu      | Val      | Lys      | Val      |



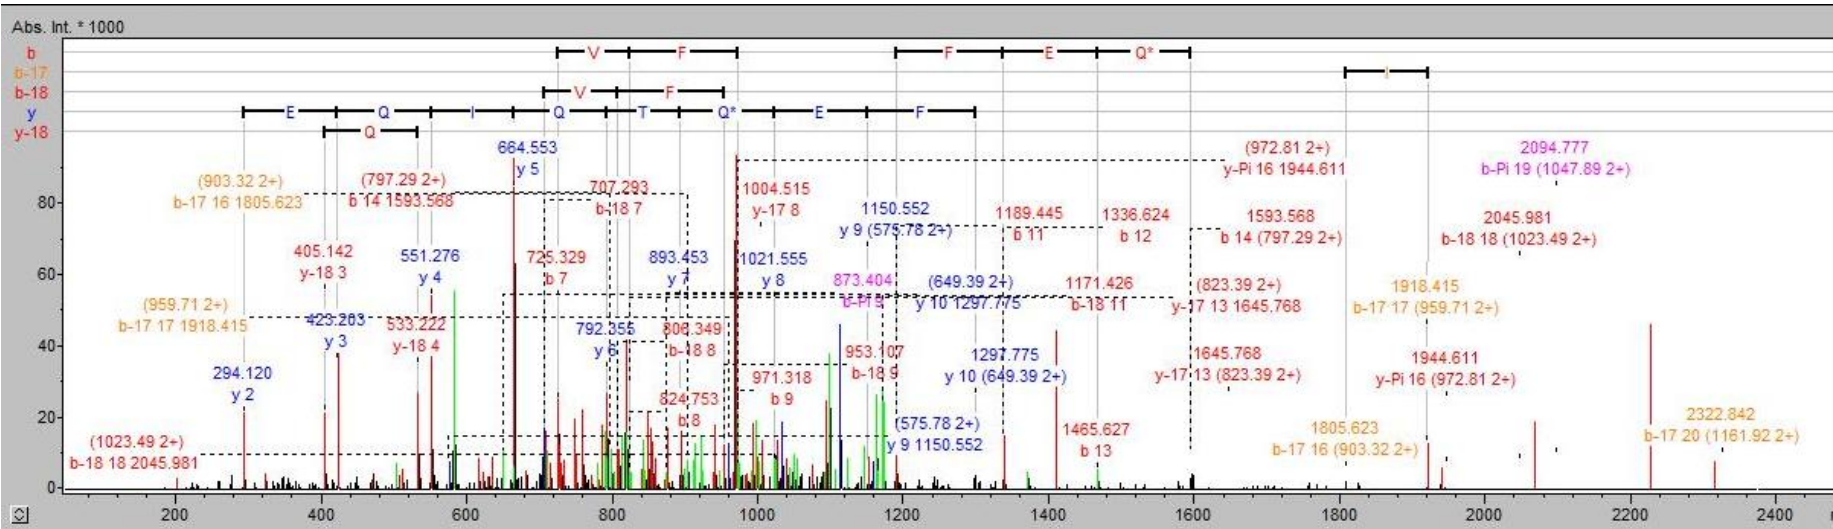

Protein View | Match Errors | MS/MS Fragments | MSMS Analysis

Sequence: LEGGSSNVFSMFETQIQEFK (Peptide Mods: 14: Deamidated (NQ) 6: Phospho (ST))

MH+(mono): 2486.095 MH+(avg): 2487.616 MS/MS Tol: 0.500 Da Peaks: 115 Above Threshold: 115 Zoom to m/z for 2+ Zoom +/-: 5 Da  
 Masses:  Monoisotopic  Average Calculate: Masses Threshold: 0.000 Assigned: 31 Not Assigned: 84 1+, m/z: 0.000

|      | L  | E  | G  | G  | S  | S  | N  | V  | F  | S  | M  | F  | E  | Q  | T  | Q  | I  | Q  | E  | F  | K  | Leu     | Glu     | Gly     | Gly     | Ser     | Ser     | Asn     | Val      | Phe      | Ser      | Met      | Phe      |
|------|----|----|----|----|----|----|----|----|----|----|----|----|----|----|----|----|----|----|----|----|----|---------|---------|---------|---------|---------|---------|---------|----------|----------|----------|----------|----------|
| Ion  | 1  | 2  | 3  | 4  | 5  | 6  | 7  | 8  | 9  | 10 | 11 | 12 | 13 | 14 | 15 | 16 | 17 | 18 | 19 | 20 | 21 | 1       | 2       | 3       | 4       | 5       | 6       | 7       | 8        | 9        | 10       | 11       | 12       |
| b    | L  | E  | G  | G  | S  | S* | N  | V  | F  | S  | M  | F  | E  | Q* | T  | Q  | I  | Q  | E  | F  | K  | 114.091 | 243.134 | 300.155 | 357.177 | 444.209 | 611.207 | 725.250 | 824.319  | 971.387  | 1058.419 | 1189.460 | 1336.528 |
| b-17 | L  | E  | G  | G  | S  | S* | N  | V  | F  | S  | M  | F  | E  | Q* | T  | Q  | I  | Q  | E  | F  | K  | -       | -       | -       | -       | -       | -       | 708.224 | 807.292  | 954.360  | 1041.392 | 1172.433 | 1319.501 |
| b-18 | L  | E  | G  | G  | S  | S* | N  | V  | F  | S  | M  | F  | E  | Q* | T  | Q  | I  | Q  | E  | F  | K  | -       | 225.123 | 282.145 | 339.166 | 426.198 | 593.197 | 707.240 | 806.308  | 953.376  | 1040.408 | 1171.449 | 1318.517 |
| b-Pi | L  | E  | G  | G  | S  | S* | N  | V  | F  | S  | M  | F  | E  | Q* | T  | Q  | I  | Q  | E  | F  | K  | -       | -       | -       | -       | 346.232 | 513.230 | 627.273 | 726.342  | 873.410  | 960.442  | 1091.483 | 1238.551 |
| y    | L  | E  | G  | G  | S  | S* | N  | V  | F  | S  | M  | F  | E  | Q* | T  | Q  | I  | Q  | E  | F  | K  | 147.113 | 294.181 | 423.224 | 551.282 | 664.366 | 792.425 | 893.473 | 1021.531 | 1150.574 | 1297.642 | 1428.683 | 1515.715 |
| y-17 | L  | E  | G  | G  | S  | S* | N  | V  | F  | S  | M  | F  | E  | Q* | T  | Q  | I  | Q  | E  | F  | K  | 130.086 | 277.155 | 406.197 | 534.256 | 647.340 | 775.398 | 876.446 | 1004.505 | 1133.547 | 1280.616 | 1411.656 | 1498.688 |
| y-18 | L  | E  | G  | G  | S  | S* | N  | V  | F  | S  | M  | F  | E  | Q* | T  | Q  | I  | Q  | E  | F  | K  | -       | -       | 405.213 | 533.272 | 646.356 | 774.414 | 875.462 | 1003.521 | 1132.563 | 1279.632 | 1410.672 | 1497.704 |
| y-Pi | L  | E  | G  | G  | S  | S* | N  | V  | F  | S  | M  | F  | E  | Q* | T  | Q  | I  | Q  | E  | F  | K  | -       | -       | -       | -       | -       | -       | 795.496 | 923.554  | 1052.597 | 1199.665 | 1330.706 | 1417.738 |
|      | 21 | 20 | 19 | 18 | 17 | 16 | 15 | 14 | 13 | 12 | 11 | 10 | 9  | 8  | 7  | 6  | 5  | 4  | 3  | 2  | 1  | Lys     | Phe     | Glu     | Gln     | Ile     | Gln     | Thr     | Gln      | Glu      | Phe      | Met      | Ser      |

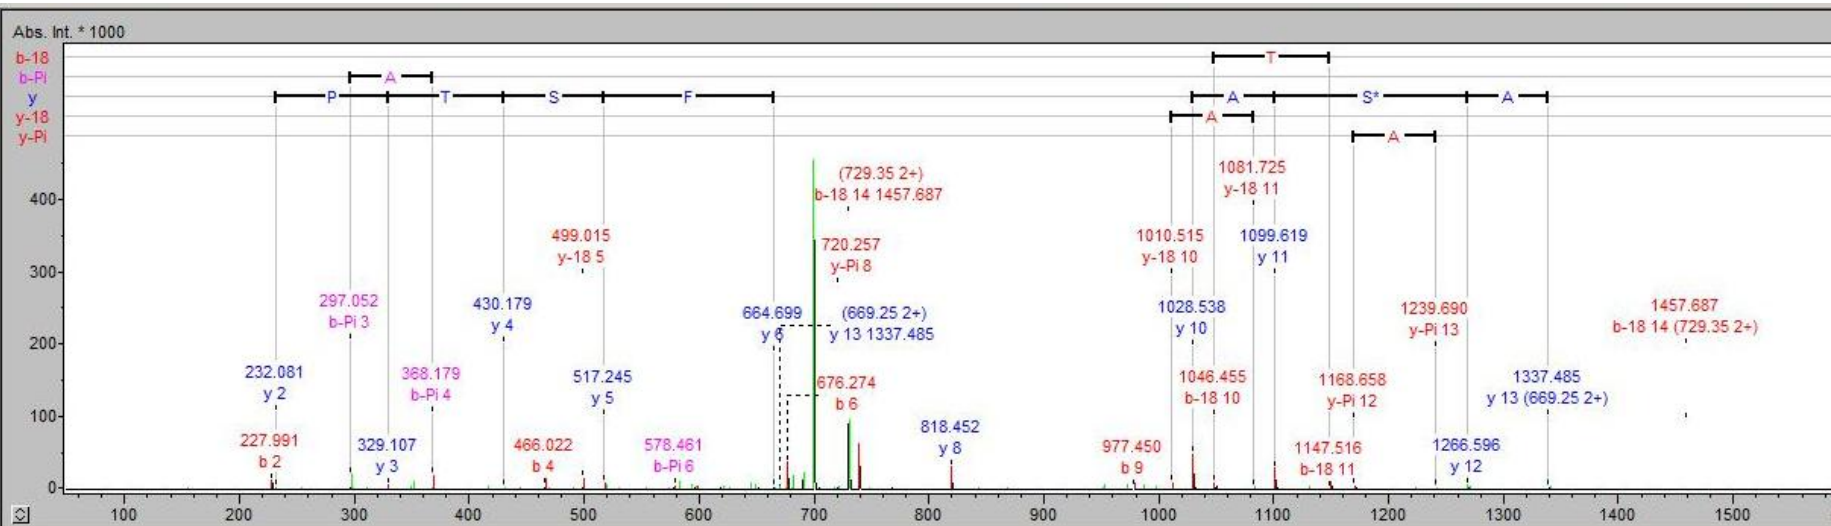

Protein View | Match Errors | MS/MS Fragments | MSMS Analysis

Sequence: RA<sup>S</sup>APLPGFSTPGR (Peptide Mods: 3: Phospho (ST))

MH+(mono): 1493.726    MH+(avg): 1494.571    MS/MS Tol: 0.500 Da    Peaks: 68    Above Threshold: 68    Zoom to m/z for 2+    Zoom +/-: 5 Da

Masses:  Monoisotopic     Average    Calculate: Masses    Threshold: 0.000    Assigned: 26    Not Assigned: 42    1+, m/z: 0.000

|      | R  | A  | S  | A  | P  | L | P | G | F | S  | T  | P  | G  | R  | Arg     | Ala     | Ser     | Ala     | Pro     | Leu     | Pro     | Gly     | Phe     | Ser      | Thr      | Pro      | Gly      | Arg      |
|------|----|----|----|----|----|---|---|---|---|----|----|----|----|----|---------|---------|---------|---------|---------|---------|---------|---------|---------|----------|----------|----------|----------|----------|
| Ion  | 1  | 2  | 3  | 4  | 5  | 6 | 7 | 8 | 9 | 10 | 11 | 12 | 13 | 14 | 1       | 2       | 3       | 4       | 5       | 6       | 7       | 8       | 9       | 10       | 11       | 12       | 13       | 14       |
| b    | R  | A  | S* | A  | P  | L | P | G | F | S  | T  | P  | G  | R  | 157.108 | 228.145 | 395.144 | 466.181 | 563.234 | 676.318 | 773.371 | 830.392 | 977.460 | 1064.492 | 1165.540 | 1262.593 | 1319.614 | 1475.715 |
| b-17 | R  | A  | S* | A  | P  | L | P | G | F | S  | T  | P  | G  | R  | 140.082 | 211.119 | 378.117 | 449.154 | 546.207 | 659.291 | 756.344 | 813.365 | 960.434 | 1047.466 | 1148.514 | 1245.566 | 1302.588 | 1458.689 |
| b-18 | R  | A  | S* | A  | P  | L | P | G | F | S  | T  | P  | G  | R  | -       | -       | 377.133 | 448.170 | 545.223 | 658.307 | 755.360 | 812.381 | 959.450 | 1046.482 | 1147.530 | 1244.582 | 1301.604 | 1457.705 |
| b-Pi | R  | A  | S* | A  | P  | L | P | G | F | S  | T  | P  | G  | R  | -       | -       | 297.167 | 368.204 | 465.257 | 578.341 | 675.394 | 732.415 | 879.484 | 966.516  | 1067.563 | 1164.616 | 1221.637 | 1377.739 |
| y    | R  | A  | S* | A  | P  | L | P | G | F | S  | T  | P  | G  | R  | 175.119 | 232.140 | 329.193 | 430.241 | 517.273 | 684.341 | 721.363 | 818.416 | 931.500 | 1028.552 | 1099.589 | 1266.588 | 1337.625 | 1493.726 |
| y-17 | R  | A  | S* | A  | P  | L | P | G | F | S  | T  | P  | G  | R  | 158.092 | 215.114 | 312.167 | 413.214 | 500.246 | 647.315 | 704.336 | 801.389 | 914.473 | 1011.526 | 1082.563 | 1249.561 | 1320.598 | 1476.700 |
| y-18 | R  | A  | S* | A  | P  | L | P | G | F | S  | T  | P  | G  | R  | -       | -       | -       | 412.230 | 499.262 | 646.331 | 703.352 | 800.405 | 913.489 | 1010.542 | 1081.579 | 1248.577 | 1319.614 | 1475.715 |
| y-Pi | R  | A  | S* | A  | P  | L | P | G | F | S  | T  | P  | G  | R  | -       | -       | -       | 332.264 | 419.296 | 566.364 | 623.386 | 720.439 | 833.523 | 930.575  | 1001.613 | 1168.611 | 1239.648 | 1395.749 |
|      | 14 | 13 | 12 | 11 | 10 | 9 | 8 | 7 | 6 | 5  | 4  | 3  | 2  | 1  | Arg     | Gly     | Pro     | Thr     | Ser     | Phe     | Gly     | Pro     | Leu     | Pro      | Ala      | Ser      | Ala      | Arg      |
