# Supplementary material for: Conditional independence mapping of DIGE data reveals PDIA3 protein species as key nodes associated with muscle aerobic capacity
Source: PubMed Central journal article supplement — J Proteomics. Author manuscript; Available in PMC 2015 Jun 25. (PMC4150023; doi:10.1016/j.jprot.2014.04.015), 2014-04-24
Supplement: NIHMS600477-supplement-03.pdf [file NIHMS600477-supplement-03.pdf]

We have no conflicts of interest to disclose.
